# Supplementary material for: Human Myometrial Cell Fate under Chronic Oxidative Stress for Leiomyomagenesis
Source: Research Square preprint supplement (doi:10.21203/rs.3.rs-9323630/v1), 2026-07-20
Supplement: Supplementary file 1 [file ffb382e586cb1c9f09590ffd.xlsx]

## Sheet: Table S1 68K vs 68Q in vitro
ID	log2FoldChange	pvalue	padj	WSPQ-35	WSPQ-34	WSPQ-33	WSPQ-32	WSPQ-31	WSPQ-4	WSPQ-3	WSPQ-2	Gene.name
ENSG00000000971	2.31219	0.00013494	0.00163419	1257.52	1284.13	506.06	160.478	114.014	747.927	796.985	41.3827	CFH
ENSG00000001561	-3.86456	3.70658e-17	8.18443e-15	15.4353	11.7877	163.725	193.644	232.225	9.40788	7.78812	64.8329	ENPP4
ENSG00000001630	1.17461	0.00466319	0.0294307	87.1641	106.826	105.94	46.0037	37.0721	202.269	168.743	60.6947	CYP51A1
ENSG00000003096	3.70002	0.000610326	0.00579381	71.7288	1.47347	3.50215	1.06985	3.49737	48.2154	5.19208	1.37942	KLHL13
ENSG00000004059	1.14385	0.00556639	0.0338839	889.8	904.708	657.528	456.828	479.839	2003.88	2181.97	1113.2	ARF5
ENSG00000004468	-2.56782	3.24963e-11	2.2974e-09	11.8035	13.9979	126.953	101.636	85.3358	22.3437	14.2782	51.0387	CD38
ENSG00000005249	-1.40613	4.43182e-06	9.00838e-05	178.868	212.916	384.361	578.791	484.036	112.895	141.484	268.988	PRKAR2B
ENSG00000005379	2.55631	5.61828e-13	6.07792e-11	161.617	164.292	53.4077	27.8162	36.3726	308.108	334.889	46.9004	TSPOAP1
ENSG00000006432	-2.82593	1.40761e-06	3.26934e-05	5.44776	2.94693	62.1631	80.239	102.823	22.3437	23.3644	126.907	MAP3K9
ENSG00000006740	-1.40662	5.13143e-08	1.77497e-06	46.3059	45.6775	100.687	165.827	136.397	65.8552	55.8149	161.393	ARHGAP44
ENSG00000007350	-3.83308	3.65154e-06	7.60454e-05	0.907959	0	25.3906	14.978	20.9842	2.35197	2.59604	11.0354	TKTL1
ENSG00000008196	-1.91826	1.38291e-06	3.22591e-05	93.5198	84.7243	212.755	236.438	428.777	108.191	129.802	693.85	TFAP2B
ENSG00000009694	2.14727	0.00880385	0.0481073	33.5945	6.6306	7.00429	1.06985	2.7979	21.1677	5.19208	4.13827	TENM1
ENSG00000010310	1.89272	0.00457821	0.0290422	15.4353	20.6285	7.87983	2.13971	2.7979	38.8075	35.0466	17.9325	GIPR
ENSG00000010438	-2.31525	2.06273e-05	0.000334499	37.2263	23.5755	120.824	178.666	188.158	72.9111	76.5832	554.529	PRSS3
ENSG00000011201	-1.68226	1.87945e-08	7.33532e-07	448.532	506.872	1235.38	1775.96	1461.2	305.756	364.744	749.027	ANOS1
ENSG00000011465	1.89519	0.000852372	0.00761766	1916.7	2732.54	1207.37	404.405	295.877	1021.93	1987.27	150.357	DCN
ENSG00000011677	-1.03014	1.27549e-08	5.19184e-07	653.731	601.911	1309.8	1316.99	1163.92	602.104	464.691	954.562	GABRA3
ENSG00000013297	-1.40334	0.00655646	0.0383328	196.119	431.726	585.734	871.931	757.53	56.4473	427.049	725.577	CLDN11
ENSG00000014914	1.24434	8.94431e-25	4.97149e-22	816.255	844.296	328.326	342.353	361.628	872.581	863.184	404.171	MTMR11
ENSG00000018236	-3.58456	0.000270211	0.00294492	0	0	32.3949	40.6544	30.0774	4.70394	5.19208	5.5177	CNTN1
ENSG00000019991	1.63098	0.0061095	0.0364267	78.0845	47.8877	34.1459	4.27942	9.09316	59.9753	28.5565	22.0708	HGF
ENSG00000020181	1.48862	0.000547986	0.00533071	1101.35	1082.26	689.047	513.53	490.331	2740.05	3010.11	1135.27	ADGRA2
ENSG00000022556	1.85706	4.97567e-05	0.000715459	79.9004	63.3591	46.4034	14.978	21.6837	109.367	89.5634	9.65597	NLRP2
ENSG00000023608	-1.9826	3.62182e-08	1.31487e-06	1014.19	912.076	2856	3954.18	3311.31	508.026	508.824	1515.99	SNAPC1
ENSG00000023909	-1.03159	0.000610328	0.00579381	1064.13	1332.01	1807.11	2078.73	2271.89	603.28	686.653	1382.18	GCLM
ENSG00000025772	-1.06255	7.74768e-07	1.9213e-05	483.034	461.932	930.696	1004.59	1193.3	579.761	672.375	1456.67	TOMM34
ENSG00000026751	-6.74109	1.28106e-36	1.58842e-33	3.63184	0.736733	259.159	332.725	283.986	3.52796	2.59604	184.843	SLAMF7
ENSG00000027075	-1.67234	2.15282e-08	8.23547e-07	53.5696	72.9366	189.991	221.46	170.672	37.6315	53.2188	114.492	PRKCH
ENSG00000033122	-1.38409	0.000737859	0.00677309	230.622	131.139	325.7	420.453	462.352	129.358	57.1129	224.846	LRRC7
ENSG00000035115	1.0852	6.10105e-05	0.000846324	353.196	415.518	138.335	112.335	187.459	225.789	262.2	154.496	SH3YL1
ENSG00000037241	1.98818	2.94297e-24	1.43751e-21	443.084	492.138	119.949	103.776	119.61	529.193	554.255	168.29	RPL26L1
ENSG00000038295	-1.71528	3.69593e-05	0.000555012	360.46	161.345	890.421	909.376	896.026	372.787	99.9476	569.702	TLL1
ENSG00000038945	-2.34735	0.000111232	0.00139215	3.63184	1.47347	24.515	32.0956	21.6837	7.05591	6.4901	11.0354	MSR1
ENSG00000043462	-2.79871	0.00153777	0.0122649	0.907959	3.68367	25.3906	21.3971	25.1811	4.70394	1.29802	1.37942	LCP2
ENSG00000044524	-1.9236	2.13883e-07	6.28001e-06	9.98755	19.1551	49.9056	43.864	77.6416	14.1118	14.2782	46.9004	EPHA3
ENSG00000046604	-1.46081	0.00695875	0.0399744	1532.64	402.993	2805.22	3204.21	2669.89	1446.46	271.286	1376.67	DSG2
ENSG00000046774	-3.86984	1.59281e-57	6.41861e-54	554.763	380.154	7796.65	8288.16	7755.07	729.111	407.578	6426.74	MAGEC2
ENSG00000047597	-4.85485	2.40563e-11	1.75144e-09	3.63184	0	48.1545	56.7023	40.5695	1.17599	1.29802	26.2091	XK
ENSG00000047936	-2.35529	2.901e-10	1.67603e-08	17.2512	16.9449	60.412	113.405	97.2269	21.1677	9.08614	60.6947	ROS1
ENSG00000049540	2.25306	0.00038256	0.00394782	3365.8	3379.4	1076.03	264.254	730.251	8796.37	8630.54	3001.63	ELN
ENSG00000053702	1.09591	0.000658467	0.00617801	63.5571	59.6754	28.8927	21.3971	33.5747	67.0312	93.4575	49.6593	NRIP2
ENSG00000055163	-1.79693	2.89169e-05	0.000451658	27.2388	30.2061	149.717	170.107	180.464	78.791	88.2654	273.126	CYFIP2
ENSG00000055732	-1.4091	7.29291e-08	2.4593e-06	96.2437	75.8835	178.609	156.199	270.696	78.791	58.4109	217.949	MCOLN3
ENSG00000057294	-2.11318	3.6633e-24	1.71336e-21	114.403	102.406	439.519	440.78	445.565	92.9028	71.3911	331.062	PKP2
ENSG00000058335	-2.39428	9.52138e-13	9.83814e-11	21.791	16.2081	63.9142	117.684	118.911	22.3437	23.3644	136.563	RASGRF1
ENSG00000058866	-1.66819	4.04805e-10	2.22698e-08	21.791	27.2591	72.6695	90.9376	65.7505	21.1677	27.2584	82.7655	DGKG
ENSG00000060140	-1.99514	2.67018e-17	6.06207e-15	73.5447	76.6203	203.125	286.721	299.375	47.0394	63.603	257.952	STYK1
ENSG00000060718	-2.55799	1.5114e-07	4.72136e-06	10.8955	4.4204	104.189	114.474	79.74	24.6957	23.3644	63.4535	COL11A1
ENSG00000062716	1.13895	3.11441e-08	1.15405e-06	8295.12	8018.6	2871.76	2713.15	3668.74	5814.07	5454.28	3271.99	VMP1
ENSG00000063438	1.24426	7.44215e-05	0.000993047	1671.55	1940.56	1033.13	705.034	815.587	2608.34	3335.91	1481.5	AHRR
ENSG00000064692	-1.08927	7.65156e-10	3.99144e-08	204.291	198.181	346.713	414.033	483.336	163.462	216.769	420.724	SNCAIP
ENSG00000065618	-2.32733	4.96152e-11	3.37446e-09	14.5273	20.6285	127.828	177.596	116.812	31.7516	40.2386	104.836	COL17A1
ENSG00000065833	-1.04894	0.000383636	0.00395639	1268.42	910.602	2191.47	2337.63	2208.94	918.445	693.143	1104.92	ME1
ENSG00000066056	-1.21747	0.00531916	0.0327607	141.642	96.5121	478.919	546.695	456.057	446.874	234.942	653.847	TIE1
ENSG00000066230	2.13038	0.00016007	0.00187286	77.1765	128.928	33.2704	13.9081	25.8805	129.358	311.525	75.8683	SLC9A3
ENSG00000066405	1.65277	0.000208388	0.00235977	31.7786	43.4673	7.87983	5.34927	17.4868	28.2236	45.4307	16.5531	CLDN18
ENSG00000066923	1.86966	2.01953e-10	1.21921e-08	140.734	112.72	42.9013	23.5368	24.4816	134.062	114.226	48.2798	STAG3
ENSG00000067992	-1.17059	1.54203e-08	6.12215e-07	89.888	82.5141	215.382	182.945	203.547	71.7351	88.2654	143.46	PDK3
ENSG00000069011	-2.52513	0.00236145	0.0173255	0.907959	2.2102	47.279	84.5185	44.0669	28.2236	23.3644	133.804	PITX1
ENSG00000069122	-1.49713	2.07578e-07	6.15063e-06	805.36	1024.06	2341.19	2840.46	2522.3	537.425	852.8	1386.32	ADGRF5
ENSG00000069399	1.58336	0.00349182	0.0234715	283.283	227.651	158.472	164.757	123.107	1027.81	899.528	368.306	BCL3
ENSG00000069493	1.29708	4.18112e-05	0.00061774	445.808	545.919	133.957	127.313	198.651	264.597	249.22	153.116	CLEC2D
ENSG00000069667	-1.21745	0.00329631	0.022495	122.574	145.136	311.691	304.908	252.51	81.143	64.901	95.1803	RORA
ENSG00000070182	-2.15693	8.84219e-08	2.88517e-06	33.5945	31.6795	178.609	158.338	143.392	56.4473	68.7951	364.168	SPTB
ENSG00000071242	1.92162	2.6947e-10	1.57376e-08	611.964	589.387	265.288	130.522	128.703	770.27	900.826	234.502	RPS6KA2
ENSG00000071575	1.27977	9.48687e-07	2.30995e-05	1291.12	1130.15	761.717	422.592	401.498	1186.57	1140.96	368.306	TRIB2
ENSG00000072041	-1.08244	0.00820552	0.0455614	522.984	528.974	981.477	1187.54	861.052	261.069	279.074	343.477	SLC6A15
ENSG00000072071	1.267	0.00638467	0.0376562	93.5198	81.7774	41.1502	25.6765	46.1653	168.166	177.829	104.836	ADGRL1
ENSG00000072310	1.56003	0.000792144	0.00719356	1191.24	1088.89	869.408	786.343	556.082	3921.91	3779.84	1173.89	SREBF1
ENSG00000072952	1.02977	0.00558944	0.0339986	838.954	1041	824.756	366.96	302.173	720.879	1000.77	268.988	MRVI1
ENSG00000073146	1.14441	0.00843566	0.0465459	71.7288	24.3122	28.8927	28.8861	16.7874	76.439	44.1327	23.4502	MOV10L1
ENSG00000073754	-2.91138	0.000124962	0.00154019	1.81592	13.2612	72.6695	54.5625	35.6732	1.17599	6.4901	12.4148	CD5L
ENSG00000073756	2.27477	1.32995e-14	2.06129e-12	1120.42	1105.84	218.884	207.552	152.485	679.72	569.831	139.322	PTGS2
ENSG00000075826	1.06419	1.35898e-05	0.000235541	374.079	402.993	148.841	146.57	202.847	422.179	425.751	281.403	SEC31B
ENSG00000076356	-1.03256	0.00692079	0.0398273	211.554	234.281	367.725	478.225	559.579	375.139	398.492	1088.37	PLXNA2
ENSG00000076554	-5.8107	3.46493e-18	8.4623e-16	21.791	0.736733	472.79	756.387	703.671	16.4638	2.59604	395.895	TPD52
ENSG00000076944	-2.55968	1.41522e-06	3.2823e-05	8.17163	4.4204	77.9228	96.2868	99.3253	29.3996	27.2584	124.148	STXBP2
ENSG00000077063	-1.09544	4.29533e-06	8.74198e-05	67.189	83.2509	124.326	180.805	133.6	55.2713	58.4109	131.045	CTTNBP2
ENSG00000078401	-2.45482	1.18672e-23	4.90481e-21	453.98	369.103	1468.28	2339.77	2157.18	291.644	272.584	1652.55	EDN1
ENSG00000078487	1.1112	0.00247711	0.0179773	57.2014	59.6754	29.7682	21.3971	29.3779	35.2796	49.3248	11.0354	ZCWPW1
ENSG00000079102	1.09198	0.00042188	0.00430627	236.977	251.963	176.858	89.8677	77.6416	210.501	203.789	78.6272	RUNX1T1
ENSG00000079263	-1.69264	5.03157e-08	1.7517e-06	15.4353	30.2061	63.0386	80.239	61.5537	18.8158	18.1723	67.5918	SP140
ENSG00000080031	1.19714	0.00631734	0.0373339	24.5149	22.8387	17.5107	19.2574	18.1863	59.9753	53.2188	13.7942	PTPRH
ENSG00000080166	-3.09025	7.30235e-05	0.000979256	2.72388	1.47347	50.7811	28.8861	30.0774	5.87993	3.89406	4.13827	DCT
ENSG00000080573	3.35596	2.91356e-11	2.06888e-09	483.034	469.299	117.322	39.5846	16.7874	797.318	758.044	71.7301	COL5A3
ENSG00000081041	1.51068	1.96604e-11	1.48782e-09	581.094	615.172	155.846	209.691	237.821	403.363	637.328	180.705	CXCL2
ENSG00000081052	-1.37482	1.33669e-05	0.000232429	473.047	255.646	935.949	1223.91	1003.75	489.21	250.518	642.812	COL4A4
ENSG00000081665	-1.55055	1.92175e-13	2.29457e-11	40.8582	44.9407	126.953	146.57	151.086	56.4473	46.7287	124.148	ZNF506
ENSG00000082014	1.42036	4.56703e-07	1.22286e-05	403.134	409.624	161.099	115.544	154.584	497.442	554.255	267.608	SMARCD3
ENSG00000082397	4.80689	1.93234e-28	1.48321e-25	3747.15	1372.53	105.064	114.474	88.1337	4177.1	1220.14	67.5918	EPB41L3
ENSG00000084636	1.6932	1.50621e-09	7.35716e-08	5230.75	5310.37	2383.21	1486.03	1601.8	7806.19	8306.03	2772.64	COL16A1
ENSG00000084734	1.07778	0.00311216	0.0215392	63.5571	111.247	27.1416	39.5846	33.5747	78.791	103.842	71.7301	GCKR
ENSG00000086300	-6.88915	4.20676e-14	5.79562e-12	1.81592	0	162.85	171.177	106.32	2.35197	0	33.1062	SNX10
ENSG00000086619	-1.17463	0.0068064	0.0393516	242.425	304.271	467.537	655.82	509.217	99.9588	162.253	195.878	ERO1B
ENSG00000087258	-2.16253	1.23117e-07	3.90656e-06	52.6616	64.8325	292.429	389.427	423.182	155.23	128.504	684.194	GNAO1
ENSG00000088726	-3.37798	6.37957e-10	3.41636e-08	5.44776	0.736733	27.1416	40.6544	39.1705	4.70394	5.19208	52.4181	TMEM40
ENSG00000089127	-2.25927	1.88126e-07	5.66804e-06	78.0845	64.8325	428.137	525.298	316.862	71.7351	72.6892	103.457	OAS1
ENSG00000090006	1.73942	0.00114893	0.0096708	1227.56	1328.33	800.241	583.07	530.901	4465.22	4806.57	1629.1	LTBP4
ENSG00000090238	1.61009	1.57439e-05	0.000267132	332.313	322.689	161.099	159.408	131.501	776.15	720.401	253.814	YPEL3
ENSG00000090266	1.05789	0.0037284	0.0247725	791.74	723.472	423.76	421.522	431.575	1484.09	1494.02	882.831	NDUFB2
ENSG00000090339	1.28533	3.45477e-09	1.56365e-07	1746.91	1684.91	949.957	957.519	740.043	2277.88	2185.87	589.014	ICAM1
ENSG00000090554	1.05459	0.00501351	0.0312222	56.2935	31.6795	15.7597	31.0258	25.1811	64.6792	67.4971	34.4856	FLT3LG
ENSG00000091409	-1.19057	4.84007e-07	1.28741e-05	6780.64	8147.53	13852.7	15287.1	15792.7	4165.34	5719.08	11705.8	ITGA6
ENSG00000092096	-2.81696	1.22569e-06	2.90542e-05	9.07959	9.57753	42.9013	90.9376	104.921	28.2236	22.0664	241.399	SLC22A17
ENSG00000092529	1.53904	0.000929914	0.0081571	22.699	16.9449	3.50215	8.55883	7.69421	17.6398	23.3644	8.27655	CAPN3
ENSG00000092969	-1.49056	3.75634e-06	7.80264e-05	940.646	772.833	2230.87	2819.06	2353.73	745.575	546.467	1042.84	TGFB2
ENSG00000095203	-2.12548	3.18167e-10	1.82001e-08	13.6194	16.9449	52.5322	68.4706	80.4395	17.6398	22.0664	103.457	EPB41L4B
ENSG00000095303	1.91303	2.52468e-19	6.45957e-17	3732.62	3050.81	1300.17	991.755	850.56	4515.78	3648.74	824.896	PTGS1
ENSG00000095539	1.58319	5.73287e-06	0.000112419	89.888	52.3081	18.3863	17.1177	28.6784	89.3749	70.0931	37.2445	SEMA4G
ENSG00000099139	-2.20719	1.07981e-12	1.08784e-10	13.6194	13.9979	77.9228	88.7979	63.6521	17.6398	18.1723	57.9358	PCSK5
ENSG00000099204	-1.63896	6.59153e-12	5.53379e-10	115.311	124.508	366.85	366.96	331.551	103.487	73.9872	240.02	ABLIM1
ENSG00000099308	1.02318	0.00891296	0.0485365	177.052	184.183	105.064	109.125	93.03	366.907	355.658	227.605	MAST3
ENSG00000099326	1.24679	0.00668671	0.0388552	370.447	413.307	113.82	133.732	159.48	649.144	624.348	462.107	MZF1
ENSG00000099330	1.22083	0.00461991	0.0292722	113.495	94.3019	87.5537	70.6104	55.2584	298.7	257.008	114.492	OCEL1
ENSG00000099377	1.3297	1.17146e-06	2.79331e-05	99.8755	123.034	70.0429	47.0736	51.7611	166.99	176.531	55.177	HSD3B7
ENSG00000099822	3.68358	1.37241e-08	5.51873e-07	29.9627	42.7305	3.50215	4.27942	1.39895	94.0788	92.1595	12.4148	HCN2
ENSG00000100055	-1.99885	6.53577e-06	0.000125716	5.44776	7.36733	43.7768	27.8162	39.87	17.6398	11.6822	52.4181	CYTH4
ENSG00000100079	1.64915	0.00173073	0.0134842	17.2512	12.5245	4.37768	4.27942	6.29526	25.8717	12.9802	6.89712	LGALS2
ENSG00000100206	-2.37009	5.98385e-07	1.53344e-05	3.63184	9.57753	26.2661	55.6324	48.2637	10.5839	14.2782	63.4535	DMC1
ENSG00000100234	1.00113	2.92777e-21	9.25349e-19	20607.9	20676.4	10067.8	9096.97	9562.51	17994.9	18826.5	10298.8	TIMP3
ENSG00000100288	1.1348	9.79528e-09	4.05887e-07	150.721	167.238	74.4206	55.6324	86.0353	159.934	158.359	71.7301	CHKB
ENSG00000100311	1.2618	9.89326e-06	0.000178978	96.2437	142.19	60.412	75.9596	51.7611	162.286	202.491	63.4535	PDGFB
ENSG00000100344	1.72821	8.02114e-09	3.367e-07	64.4651	71.4631	31.5193	23.5368	16.0879	77.615	83.0733	17.9325	PNPLA3
ENSG00000100583	-1.09924	0.000870118	0.0077403	26.3308	33.8897	47.279	64.1912	58.7558	27.0477	12.9802	48.2798	SAMD15
ENSG00000100767	1.35595	6.52624e-05	0.000895289	108.955	95.0386	39.3992	35.3052	30.0774	149.35	98.6496	74.4889	PAPLN
ENSG00000100842	-6.6247	4.10389e-20	1.20274e-17	0.907959	0.736733	172.481	266.394	251.811	10.5839	2.59604	685.574	EFS
ENSG00000100968	1.17317	0.00315544	0.0217547	2108.28	2029.7	1156.58	790.622	919.109	3793.73	3831.76	2351.92	NFATC4
ENSG00000100979	1.34102	0.00150898	0.0121039	180.684	187.13	164.601	125.173	90.9316	511.554	511.42	168.29	PLTP
ENSG00000101162	1.56184	0.007571	0.0426702	15.4353	19.8918	2.62661	6.41912	2.7979	11.7599	15.5762	11.0354	TUBB1
ENSG00000101265	-1.50881	4.57565e-05	0.000665732	17.2512	8.8408	45.5279	39.5846	60.1548	22.3437	22.0664	49.6593	RASSF2
ENSG00000101276	-2.01489	3.27696e-05	0.000502582	4.5398	8.8408	55.1588	42.7942	41.9684	25.8717	10.3842	56.5564	SLC52A3
ENSG00000101333	-1.23046	6.44155e-07	1.63257e-05	2384.3	2108.53	3958.3	4500.88	5199.19	1806.31	1170.81	3874.8	PLCB4
ENSG00000101347	-1.02039	1.34891e-11	1.05549e-09	968.792	940.072	1889.41	2142.92	1878.79	913.741	837.223	1513.23	SAMHD1
ENSG00000101670	-3.38795	0.000137439	0.00165822	9.07959	0.736733	246.901	52.4228	39.87	19.9918	5.19208	22.0708	LIPG
ENSG00000101680	1.00394	7.35294e-08	2.47437e-06	1129.5	1250.97	507.811	516.739	594.553	1205.38	1255.19	798.687	LAMA1
ENSG00000101695	-4.49254	2.11187e-14	3.12304e-12	6.35571	0.736733	69.1674	119.824	99.3253	7.05591	1.29802	51.0387	RNF125
ENSG00000101825	-3.22565	2.1723e-08	8.27785e-07	19.0671	29.4693	204.876	241.787	188.158	7.05591	15.5762	38.6239	MXRA5
ENSG00000101898	-1.03097	0.00426693	0.0274128	62.6492	47.8877	86.6781	86.6582	93.03	25.8717	23.3644	63.4535	MCTS2P
ENSG00000101938	-1.42494	5.05691e-08	1.75673e-06	120.759	100.196	268.79	346.633	286.085	119.951	68.7951	200.017	CHRDL1
ENSG00000102048	-1.097	0.00085107	0.00761287	37.2263	25.0489	63.9142	80.239	53.8595	39.9835	16.8743	57.9358	ASB9
ENSG00000102287	1.62044	3.55192e-07	9.83734e-06	434.912	436.146	85.8026	94.1471	174.169	439.819	451.711	220.708	GABRE
ENSG00000102409	-2.90685	1.16853e-15	2.02532e-13	19.9751	11.051	94.558	161.548	101.424	17.6398	10.3842	85.5243	BEX4
ENSG00000102755	-1.0801	8.03613e-05	0.00105742	107.139	75.1468	166.352	190.434	185.361	90.5509	48.0268	137.942	FLT1
ENSG00000102760	2.48702	0.000286496	0.00310352	17.2512	38.3101	14.8841	6.41912	2.7979	23.5197	73.9872	2.75885	RGCC
ENSG00000102878	1.50288	0.000677764	0.00632593	182.5	149.557	57.7854	38.5147	83.9369	305.756	303.737	153.116	HSF4
ENSG00000102886	1.19968	0.00706978	0.0403676	55.3855	44.204	16.6352	17.1177	22.3832	72.9111	79.1793	55.177	GDPD3
ENSG00000103021	-1.9624	2.98097e-08	1.11161e-06	8.17163	10.3143	56.0343	49.2133	41.269	14.1118	18.1723	45.521	CCDC113
ENSG00000103241	1.37216	1.02961e-05	0.00018502	300.534	238.702	194.369	120.893	89.5327	455.106	366.042	120.01	FOXF1
ENSG00000103253	1.67822	0.00575382	0.0347232	106.231	100.196	60.412	41.7243	48.9632	371.611	445.221	169.669	HAGHL
ENSG00000103490	1.66862	0.00374406	0.0248356	70.8208	68.5162	30.6438	48.1434	30.7769	221.085	295.949	97.9391	PYCARD
ENSG00000103647	-1.57748	4.78755e-05	0.000691035	168.88	207.022	383.485	530.648	687.583	258.717	324.505	1259.41	CORO2B
ENSG00000103742	-3.0281	1.42005e-05	0.000244288	2.72388	3.68367	105.064	147.64	76.9421	29.3996	10.3842	38.6239	IGDCC4
ENSG00000103888	2.70079	0.000642203	0.006043	615.596	1050.58	411.502	29.9559	26.58	525.665	1115	40.0033	CEMIP
ENSG00000104043	1.91113	3.08369e-05	0.000477483	44.49	54.5183	17.5107	12.8382	10.4921	39.9835	28.5565	2.75885	ATP8B4
ENSG00000104081	1.21939	0.00159257	0.0126137	180.684	148.82	130.455	67.4008	44.7663	152.878	175.233	38.6239	BMF
ENSG00000104321	1.22153	0.00276923	0.0197074	177.052	167.238	64.7897	62.0515	70.6469	62.3272	120.716	27.5885	TRPA1
ENSG00000104332	-1.70935	9.72108e-06	0.000176259	18.1592	22.102	66.5408	80.239	79.0405	9.40788	38.9406	60.6947	SFRP1
ENSG00000104381	-1.08967	0.000149736	0.00177993	87.1641	78.8305	132.206	220.39	195.153	83.495	59.709	110.354	GDAP1
ENSG00000104415	1.97449	0.00206456	0.0155726	296.903	382.365	205.751	41.7243	27.2795	218.733	271.286	22.0708	WISP1
ENSG00000104450	-1.18917	2.13892e-07	6.28001e-06	168.88	201.865	311.691	386.217	419.684	115.247	141.484	318.647	SPAG1
ENSG00000104722	-1.933	4.75451e-06	9.52025e-05	159.801	257.857	612	1027.06	728.152	88.1989	192.107	300.714	NEFM
ENSG00000104783	1.56516	0.00111739	0.00946631	181.592	234.281	91.9314	60.9817	74.1442	321.044	563.341	213.811	KCNN4
ENSG00000104883	2.35324	0.00561099	0.0340269	8.17163	7.36733	1.75107	1.06985	3.49737	39.9835	29.8545	11.0354	PEX11G
ENSG00000104903	3.7316	0.000136117	0.0016472	23.6069	28.7326	1.75107	0	0	55.2713	64.901	12.4148	LYL1
ENSG00000105048	2.09774	4.95961e-12	4.36852e-10	504.825	465.615	199.622	139.081	118.211	850.237	907.316	180.705	TNNT1
ENSG00000105223	1.10063	0.00790446	0.0442403	1698.79	1675.33	1490.16	1091.25	1028.23	4433.46	4493.75	2127.07	PLD3
ENSG00000105290	1.78158	0.00101768	0.00876283	39.9502	88.408	40.2747	22.4669	15.3884	114.071	203.789	52.4181	APLP1
ENSG00000105376	1.4688	0.00258942	0.0186501	380.435	364.683	250.403	159.408	165.076	1152.47	977.41	464.866	ICAM5
ENSG00000105383	5.22076	4.19072e-11	2.89915e-09	471.231	395.626	33.2704	4.27942	0	451.578	394.598	8.27655	CD33
ENSG00000105419	1.03769	0.00193552	0.0148071	591.989	615.909	483.296	401.195	331.551	1175.99	1323.98	590.394	MEIS3
ENSG00000105514	1.55798	1.71888e-07	5.28754e-06	139.826	190.814	80.5494	46.0037	59.4553	129.358	215.471	41.3827	RAB3D
ENSG00000105519	1.40344	0.00113108	0.00954045	111.679	104.616	33.2704	34.2353	32.8753	138.766	177.829	103.457	CAPS
ENSG00000105520	1.20276	0.00437024	0.0279872	424.017	461.932	255.657	270.673	252.51	858.469	1287.64	539.355	PLPPR2
ENSG00000105655	2.05104	0.00452102	0.0287113	15.4353	11.051	5.25322	4.27942	8.39369	64.6792	61.007	19.3119	ISYNA1
ENSG00000105696	2.35197	0.000986768	0.00856528	13.6194	10.3143	3.50215	4.27942	3.49737	54.0953	38.9406	12.4148	TMEM59L
ENSG00000105708	-1.34593	0.00496114	0.0310076	39.9502	27.2591	91.9314	74.8898	91.6311	29.3996	14.2782	23.4502	ZNF14
ENSG00000105792	1.62749	3.1278e-07	8.81417e-06	244.241	293.22	68.2919	75.9596	78.3411	119.951	189.511	51.0387	CFAP69
ENSG00000105808	1.37131	7.40652e-06	0.000139182	117.127	129.665	48.1545	29.9559	46.8647	156.406	84.3713	64.8329	RASA4
ENSG00000105877	-1.86374	8.41225e-29	6.77985e-26	88.072	90.6182	311.691	386.217	363.726	110.543	98.6496	343.477	DNAH11
ENSG00000105889	-1.93572	8.01948e-37	1.07722e-33	130.746	138.506	516.567	590.559	474.243	125.83	144.08	481.419	STEAP1B
ENSG00000105894	1.0719	1.98441e-07	5.93444e-06	3035.31	2420.91	1571.59	1235.68	1121.96	2694.18	2143.03	965.597	PTN
ENSG00000105929	-1.17774	8.5263e-05	0.00111194	19.9751	32.4163	51.6567	79.1692	75.5432	36.4555	29.8545	60.6947	ATP6V0A4
ENSG00000106031	-1.14484	0.000137832	0.00165923	54.4776	41.2571	84.9271	99.4964	90.9316	28.2236	28.5565	64.8329	HOXA13
ENSG00000106069	3.12091	2.10931e-09	9.8858e-08	66.281	74.4101	3.50215	3.20956	6.29526	49.3914	31.1525	13.7942	CHN2
ENSG00000106133	1.88563	4.4981e-11	3.0985e-09	110.771	122.298	22.764	23.5368	27.979	101.135	75.2852	38.6239	NSUN5P2
ENSG00000106258	1.50006	0.000122769	0.00151641	87.1641	109.773	49.9056	12.8382	30.0774	67.0312	85.6694	30.3473	CYP3A5
ENSG00000106261	1.04192	5.5777e-06	0.000109911	3045.3	3222.47	1639	1184.33	1200.3	2110.89	2118.37	1074.57	ZKSCAN1
ENSG00000106330	1.37515	0.00159724	0.0126329	212.462	192.287	132.206	105.916	94.429	488.034	554.255	226.226	MOSPD3
ENSG00000106333	1.79636	0.000329562	0.00349258	2989.91	2916.73	1524.31	877.28	957.58	7823.83	8507.23	3044.39	PCOLCE
ENSG00000106336	2.00426	0.00162359	0.0128162	13.6194	15.4714	3.50215	8.55883	2.7979	41.1595	35.0466	12.4148	FBXO24
ENSG00000106397	1.10817	0.00215723	0.0161282	2387.02	2321.45	1778.22	1320.2	1233.87	4955.6	5076.56	2506.41	PLOD3
ENSG00000106404	1.25573	0.000785344	0.00714389	113.495	111.983	60.412	46.0037	52.4605	224.613	189.511	110.354	CLDN15
ENSG00000106479	1.61316	2.58473e-08	9.73439e-07	122.574	147.347	37.6481	46.0037	39.1705	142.294	186.915	75.8683	ZNF862
ENSG00000106511	1.37095	2.42889e-05	0.000386489	42.6741	41.2571	21.0129	21.3971	13.9895	59.9753	41.5367	15.1737	MEOX2
ENSG00000106526	1.41573	0.00465877	0.0294143	74.4527	95.0386	59.5365	16.0478	16.7874	67.0312	51.9208	15.1737	ACTR3C
ENSG00000106536	-2.40681	8.43474e-05	0.00110089	11.8035	3.68367	49.9056	112.335	79.74	22.3437	12.9802	22.0708	POU6F2
ENSG00000106537	-1.40019	4.56032e-05	0.000664627	180.684	81.7774	344.961	388.357	379.115	168.166	79.1793	231.743	TSPAN13
ENSG00000106538	2.43312	0.000541471	0.00528328	25.4229	27.2591	14.8841	2.13971	1.39895	65.8552	45.4307	12.4148	RARRES2
ENSG00000106560	1.70056	0.000361513	0.00377656	132.562	151.03	81.4249	25.6765	32.1758	110.543	107.736	13.7942	GIMAP2
ENSG00000106665	1.17947	0.00151219	0.0121148	1435.48	1471.99	1020.88	802.39	717.66	3001.11	3321.63	1535.3	CLIP2
ENSG00000106688	-1.10314	2.5526e-11	1.83684e-09	230.622	241.648	415.004	471.806	511.315	174.046	219.365	466.245	SLC1A1
ENSG00000106952	-3.34417	8.4053e-07	2.07164e-05	0	2.2102	17.5107	33.1655	34.2742	3.52796	5.19208	17.9325	TNFSF8
ENSG00000107099	-2.56118	0.000437067	0.00443924	111.679	4.4204	452.652	584.14	414.089	131.71	33.7485	208.293	DOCK8
ENSG00000107159	-1.66797	0.0013814	0.0112516	31.7786	22.8387	246.901	142.291	97.9263	91.7269	32.4505	77.2478	CA9
ENSG00000107518	-2.19611	1.93642e-14	2.89011e-12	18.1592	20.6285	75.2962	102.706	88.8332	22.3437	12.9802	75.8683	ATRNL1
ENSG00000107562	1.13726	0.00015247	0.0018018	3841.58	4849.91	1340.45	1331.97	2043.16	3306.87	4819.55	2932.66	CXCL12
ENSG00000107738	1.66303	9.48904e-05	0.00122336	123.482	125.245	40.2747	42.7942	58.0563	301.052	229.75	106.216	VSIR
ENSG00000107796	1.59312	7.08992e-11	4.66459e-09	11098.9	8303.72	4874.99	3453.49	2852.45	13954.2	9880.53	3149.23	ACTA2
ENSG00000107821	1.43664	0.00025801	0.00282724	182.5	129.665	100.687	75.9596	71.3463	419.827	281.67	126.907	KAZALD1
ENSG00000107968	1.08949	2.67435e-05	0.000420154	167.972	135.559	72.6695	79.1692	64.3516	118.775	125.908	40.0033	MAP3K8
ENSG00000108018	1.31231	1.56945e-07	4.86501e-06	370.447	327.846	178.609	147.64	99.3253	312.812	286.863	96.5597	SORCS1
ENSG00000108342	2.16306	3.96857e-05	0.000589579	660.086	1050.58	314.318	406.544	198.651	818.486	1865.26	60.6947	CSF3
ENSG00000108515	1.21103	0.00151761	0.0121462	179.776	162.818	93.6824	102.706	87.4342	389.251	343.975	182.084	ENO3
ENSG00000108688	2.13667	0.000152378	0.0018018	38.1343	41.9938	14.0086	7.48898	9.09316	22.3437	37.6426	0	CCL7
ENSG00000108691	2.17123	4.5894e-07	1.22681e-05	2062.88	2801.06	816.876	486.784	309.167	1159.52	2207.93	213.811	CCL2
ENSG00000108798	-2.18899	0.000508895	0.0050232	18.1592	4.4204	80.5494	100.566	93.7295	58.7993	12.9802	151.737	ABI3
ENSG00000108799	1.10634	5.14057e-15	8.36978e-13	956.081	971.751	474.541	373.379	414.089	874.933	972.217	493.834	EZH1
ENSG00000108846	1.00062	0.0025997	0.0186907	959.713	1155.93	637.391	539.206	528.103	1633.44	1915.88	1128.37	ABCC3
ENSG00000108852	-1.59345	1.38447e-07	4.36717e-06	19.9751	20.6285	76.1717	93.0773	80.4395	35.2796	40.2386	93.8008	MPP2
ENSG00000108932	3.06227	4.81484e-09	2.14393e-07	54.4776	130.402	16.6352	4.27942	7.69421	42.3355	83.0733	8.27655	SLC16A6
ENSG00000109107	-2.05973	1.68984e-09	8.08264e-08	22.699	13.9979	78.7983	127.313	113.315	36.4555	27.2584	91.042	ALDOC
ENSG00000109265	-2.09494	0.000343968	0.00362143	9.07959	3.68367	22.764	50.2831	32.8753	11.7599	3.89406	13.7942	KIAA1211
ENSG00000109321	-1.37847	1.14953e-09	5.70129e-08	49.9378	58.9387	125.202	173.316	141.294	57.6233	46.7287	115.872	AREG
ENSG00000109323	1.0139	0.00124513	0.0103295	2672.12	2462.16	1499.79	1465.7	1124.75	2401.36	1863.96	562.805	MANBA
ENSG00000109339	1.5928	1.28907e-06	3.03336e-05	123.482	100.196	42.9013	25.6765	28.6784	85.8469	59.709	24.8296	MAPK10
ENSG00000110203	-1.47097	4.20003e-10	2.27947e-08	108.047	102.406	372.103	314.537	342.742	159.934	164.849	446.933	FOLR3
ENSG00000110328	-1.69745	5.44264e-05	0.000768213	9.07959	7.36733	52.5322	49.2133	46.8647	23.5197	19.4703	37.2445	GALNT18
ENSG00000110436	2.09326	2.25967e-07	6.57466e-06	64.4651	36.0999	11.382	7.48898	11.8911	41.1595	32.4505	9.65597	SLC1A2
ENSG00000110455	1.26762	4.74505e-06	9.51312e-05	215.186	264.487	102.438	72.7501	114.714	345.74	241.432	154.496	ACCS
ENSG00000110628	1.73605	0.00148291	0.0119455	80.8084	87.6713	39.3992	47.0736	39.87	312.812	294.651	107.595	SLC22A18
ENSG00000110881	1.5717	1.15066e-05	0.000204493	169.788	148.82	111.193	65.2611	58.0563	241.077	254.412	37.2445	ASIC1
ENSG00000111052	-1.72015	4.18487e-07	1.13181e-05	40.8582	26.5224	116.446	142.291	151.786	58.7993	25.9604	86.9037	LIN7A
ENSG00000111057	-1.19535	0.0010937	0.00932274	574.738	504.662	1103.18	1306.29	1440.92	957.252	915.105	2907.83	KRT18
ENSG00000111305	-1.88885	0.00158207	0.0125562	10.8955	2.94693	20.1373	31.0258	26.58	14.1118	1.29802	30.3473	GSG1
ENSG00000111335	-1.17881	0.000311534	0.00333441	427.649	554.76	1118.06	1320.2	967.372	324.572	408.877	480.04	OAS2
ENSG00000111371	-1.03272	3.61765e-05	0.000546001	1818.64	1926.56	3220.22	3661.04	3563.82	1253.6	1190.28	2220.87	SLC38A1
ENSG00000111846	-1.29012	4.03299e-08	1.43505e-06	503.917	581.283	1065.53	1308.43	1313.61	361.027	401.088	834.552	GCNT2
ENSG00000111859	-1.79625	2.51253e-25	1.61998e-22	238.793	212.916	875.537	986.405	903.72	318.692	293.353	914.558	NEDD9
ENSG00000111863	-2.03197	4.82115e-11	3.29289e-09	216.094	268.908	757.339	834.486	922.606	97.6068	183.021	624.879	ADTRP
ENSG00000112182	-3.44557	8.0948e-08	2.68477e-06	0	1.47347	49.9056	50.2831	41.269	7.05591	9.08614	34.4856	BACH2
ENSG00000112246	-2.91752	0.000911419	0.00801919	0	2.2102	15.7597	18.1875	30.0774	8.2319	0	12.4148	SIM1
ENSG00000112293	-1.91993	5.60363e-06	0.000110287	6.35571	7.36733	33.2704	25.6765	21.6837	9.40788	6.4901	31.7268	GPLD1
ENSG00000112294	-2.02282	7.01754e-24	3.05718e-21	62.6492	78.8305	223.262	284.581	290.282	68.2071	55.8149	289.679	ALDH5A1
ENSG00000112309	1.57202	3.00408e-05	0.000465617	47.2139	65.5693	13.1331	9.62868	20.2847	44.6874	37.6426	23.4502	B3GAT2
ENSG00000112379	-2.39971	4.52018e-26	3.03586e-23	122.574	125.981	443.897	758.526	729.551	137.59	128.504	783.513	ARFGEF3
ENSG00000112541	-5.83547	5.39551e-36	6.21216e-33	4.5398	3.68367	256.532	329.515	337.846	7.05591	3.89406	148.978	PDE10A
ENSG00000112667	1.99325	0.00502716	0.0312868	149.813	155.451	83.176	55.6324	68.5484	912.565	828.137	307.612	DNPH1
ENSG00000112715	1.02822	5.0732e-16	9.73512e-14	7459.79	7899.25	4304.14	3772.3	3648.46	7936.72	9191.28	4204.48	VEGFA
ENSG00000112796	-7.37214	4.14831e-10	2.259e-08	0	0.736733	46.4034	86.6582	53.16	0	0	15.1737	ENPP5
ENSG00000113070	-2.08898	3.89918e-23	1.49645e-20	236.069	265.961	790.61	1042.04	1206.59	238.725	292.055	1354.59	HBEGF
ENSG00000113108	1.04348	0.00629385	0.0372296	184.316	197.445	86.6781	92.0074	118.911	323.396	366.042	223.467	APBB3
ENSG00000113356	-1.06887	0.00550417	0.0336218	1932.14	2065.06	3315.66	3858.96	3658.25	937.26	951.449	1517.37	POLR3G
ENSG00000113389	2.278	6.34973e-06	0.000122576	1439.12	1894.88	616.378	232.158	141.993	861.997	1207.16	122.769	NPR3
ENSG00000113594	-1.54803	0.000130034	0.0015891	120.759	219.546	349.339	454.688	464.451	54.0953	123.312	249.676	LIFR
ENSG00000113645	-1.18215	2.65086e-06	5.68964e-05	668.258	526.028	1532.19	2083.01	1752.18	1064.27	763.236	1482.88	WWC1
ENSG00000113742	-1.10574	2.14596e-05	0.000347645	823.519	1000.48	1549.7	1795.21	1814.44	524.489	600.984	1193.2	CPEB4
ENSG00000114270	2.34083	3.15258e-14	4.49702e-12	8984.26	9537.01	2687.9	1595.15	1845.21	14545.8	15237.5	3408.56	COL7A1
ENSG00000114405	-2.37329	0.000486613	0.00485679	1.81592	4.4204	54.2833	11.7684	16.7874	5.87993	9.08614	23.4502	C3orf14
ENSG00000114626	1.63641	0.000113946	0.00142143	446.716	456.775	201.373	205.412	207.044	1150.11	1172.11	424.863	ABTB1
ENSG00000114757	-2.00027	0.00690892	0.0397874	54.4776	17.6816	359.846	90.9376	46.8647	44.6874	15.5762	31.7268	PEX5L
ENSG00000114790	-1.04464	1.23841e-09	6.10458e-08	134.378	127.455	227.64	235.368	289.582	115.247	127.206	289.679	ARHGEF26
ENSG00000114812	2.69422	5.72407e-10	3.07554e-08	150.721	79.5672	30.6438	19.2574	18.1863	284.588	153.166	35.865	VIPR1
ENSG00000115009	-3.18995	6.85897e-05	0.000930638	3.63184	8.10407	38.5236	79.1692	67.1495	4.70394	3.89406	2.75885	CCL20
ENSG00000115423	-4.39265	7.12804e-23	2.61129e-20	24.5149	19.1551	455.279	466.456	327.354	14.1118	7.78812	151.737	DNAH6
ENSG00000115919	-2.29227	6.41163e-08	2.1896e-06	108.955	80.3039	498.18	515.67	348.338	74.0871	44.1327	147.598	KYNU
ENSG00000116183	-1.43248	1.89097e-10	1.15021e-08	46.3059	61.1489	149.717	163.688	118.211	47.0394	50.6228	125.528	PAPPA2
ENSG00000116299	-2.76257	3.76624e-11	2.62806e-09	7.26367	9.57753	84.0515	100.566	121.708	29.3996	18.1723	118.63	KIAA1324
ENSG00000116652	1.86409	0.00369501	0.024581	27.2388	34.6265	3.50215	2.13971	13.29	10.5839	23.3644	6.89712	DLEU2L
ENSG00000116675	-1.0072	5.49009e-05	0.000773556	518.445	465.615	654.901	913.655	943.59	297.524	319.313	710.403	DNAJC6
ENSG00000116701	-3.32868	4.51787e-53	1.06129e-49	57.2014	78.8305	507.811	713.593	759.629	59.9753	62.305	627.638	NCF2
ENSG00000116774	1.27009	1.1658e-05	0.000206273	1322.9	1126.47	892.172	462.177	397.301	1487.62	1342.15	435.898	OLFML3
ENSG00000116819	1.79534	0.00204349	0.0154426	35.4104	23.5755	8.75537	4.27942	6.29526	58.7993	35.0466	26.2091	TFAP2E
ENSG00000116852	-2.41581	1.51399e-05	0.000258517	10.8955	1.47347	48.1545	79.1692	56.6574	12.9358	20.7683	53.7975	KIF21B
ENSG00000117152	-1.21309	1.62849e-05	0.000274865	4071.29	5308.9	7639.93	7229	10750.2	2313.16	3788.92	10279.5	RGS4
ENSG00000117477	-1.49549	0.000155248	0.00182526	58.1094	53.7815	126.077	160.478	118.911	27.0477	25.9604	63.4535	CCDC181
ENSG00000117594	-2.30992	0.00420156	0.0270791	73.5447	50.8346	790.61	152.989	131.501	42.3355	53.2188	15.1737	HSD11B1
ENSG00000117598	-1.81834	0.000683706	0.00637401	7.26367	8.10407	18.3863	24.6066	41.269	10.5839	2.59604	16.5531	PLPPR5
ENSG00000117600	-1.49408	0.000310458	0.00332731	23.6069	12.5245	36.7725	54.5625	90.2321	28.2236	29.8545	80.0066	PLPPR4
ENSG00000117616	1.34781	5.49173e-08	1.89148e-06	1990.25	1958.97	513.065	517.809	824.68	1390.01	1479.74	824.896	RSRP1
ENSG00000117676	-1.08112	0.000809148	0.00729863	81.7163	90.6182	214.506	234.298	235.723	131.71	189.511	355.891	RPS6KA1
ENSG00000118276	-6.43675	5.45266e-42	8.78914e-39	3.63184	6.6306	413.253	632.284	492.43	3.52796	6.4901	230.364	B4GALT6
ENSG00000118292	1.55147	2.00508e-12	1.90117e-10	350.472	317.532	134.833	87.728	103.522	254.013	285.565	84.1449	C1orf54
ENSG00000118322	1.71313	0.000725026	0.00667049	17.2512	16.2081	8.75537	9.62868	4.19684	31.7516	23.3644	4.13827	ATP10B
ENSG00000118407	-2.4828	1.04062e-11	8.22242e-10	36.3184	26.5224	170.73	216.11	165.775	34.1036	16.8743	85.5243	FILIP1
ENSG00000118432	-6.54037	3.27616e-08	1.20019e-06	0	0	24.515	50.2831	27.2795	1.17599	0	11.0354	CNR1
ENSG00000118473	1.49604	2.88223e-08	1.07793e-06	4307.36	3443.49	1346.58	1105.16	1208.69	2747.1	2122.26	812.481	SGIP1
ENSG00000118777	-1.25161	5.18983e-07	1.36246e-05	43.582	37.5734	98.9356	95.217	93.7295	39.9835	28.5565	68.9712	ABCG2
ENSG00000118785	-3.72745	5.82697e-09	2.53851e-07	5.44776	0	44.6524	27.8162	28.6784	2.35197	2.59604	31.7268	SPP1
ENSG00000118849	1.21782	6.45476e-05	0.000886238	86.2561	78.8305	29.7682	21.3971	39.1705	55.2713	88.2654	42.7621	RARRES1
ENSG00000118971	-3.77143	6.71745e-58	3.60928e-54	42.6741	58.9387	612.876	931.843	735.847	47.0394	68.7951	678.677	CCND2
ENSG00000119547	-1.46675	0.00394978	0.0258103	2.72388	5.89387	14.0086	20.3272	14.689	7.05591	9.08614	17.9325	ONECUT2
ENSG00000119608	1.74326	0.00361452	0.0241253	33.5945	13.2612	2.62661	4.27942	7.69421	14.1118	27.2584	12.4148	PROX2
ENSG00000119862	-2.46396	8.42275e-11	5.47445e-09	14.5273	17.6816	81.4249	132.662	125.905	24.6957	15.5762	56.5564	LGALSL
ENSG00000119943	1.51371	1.09601e-10	6.99139e-09	863.469	824.404	318.695	315.607	253.909	1128.95	1052.69	470.384	PYROXD2
ENSG00000120051	-1.08933	0.000670009	0.00625717	100.783	100.196	207.502	270.673	190.257	88.1989	71.3911	99.3185	CFAP58
ENSG00000120093	1.19221	7.36165e-13	7.91083e-11	823.519	866.398	362.472	274.952	342.742	722.055	735.978	400.033	HOXB3
ENSG00000120162	-2.28547	5.37942e-12	4.63695e-10	23.6069	36.0999	146.215	111.265	146.89	15.2878	24.6624	86.9037	MOB3B
ENSG00000120327	1.23314	2.40378e-05	0.000382872	315.97	268.908	142.712	142.291	104.222	286.94	198.597	64.8329	PCDHB14
ENSG00000120328	1.31295	0.00450757	0.028673	111.679	86.1978	70.9185	23.5368	22.3832	81.143	61.007	19.3119	PCDHB12
ENSG00000120549	-1.99338	3.72044e-12	3.31325e-10	51.7537	31.6795	225.888	244.997	224.531	69.3831	67.4971	169.669	KIAA1217
ENSG00000120594	1.60719	5.90891e-16	1.12054e-13	569.29	477.403	158.472	157.269	148.988	421.003	355.658	133.804	PLXDC2
ENSG00000120693	-1.03658	1.45207e-06	3.33893e-05	223.358	230.597	340.584	405.475	540.693	190.51	247.922	544.873	SMAD9
ENSG00000120756	-1.48983	4.35314e-07	1.17338e-05	141.642	131.875	291.554	449.339	387.509	110.543	89.5634	204.155	PLS1
ENSG00000121318	2.44148	0.00644568	0.0378499	26.3308	27.9959	0.875537	1.06985	6.29526	10.5839	2.59604	4.13827	TAS2R10
ENSG00000121440	1.41288	4.54222e-07	1.21824e-05	624.676	741.154	323.073	211.831	224.531	759.687	1015.05	422.104	PDZRN3
ENSG00000121552	-1.18442	3.35701e-05	0.000512906	69.0049	38.3101	140.086	166.897	134.299	74.0871	58.4109	99.3185	CSTA
ENSG00000121858	-1.37644	0.00364844	0.0243315	47.2139	50.0979	158.472	127.313	89.5327	31.7516	27.2584	31.7268	TNFSF10
ENSG00000122432	1.62034	0.000809745	0.00729993	27.2388	35.3632	7.87983	6.41912	5.59579	29.3996	18.1723	17.9325	SPATA1
ENSG00000122861	-1.16466	1.262e-05	0.000220631	3828.86	3168.69	9937.34	11033.4	8024.36	4531.07	3659.12	5048.69	PLAU
ENSG00000122986	1.6894	2.00309e-06	4.42298e-05	101.691	84.7243	53.4077	32.0956	22.3832	108.191	115.524	17.9325	HVCN1
ENSG00000123338	-2.61548	1.05999e-09	5.31412e-08	8.17163	7.36733	92.8069	113.405	72.7453	18.8158	23.3644	62.0741	NCKAP1L
ENSG00000123358	2.55989	1.5573e-10	9.69192e-09	860.745	832.509	208.378	169.037	163.677	1903.92	1852.28	384.859	NR4A1
ENSG00000123500	1.58336	0.00107085	0.00914732	252.413	226.914	129.579	74.8898	58.0563	175.222	185.617	16.5531	COL10A1
ENSG00000123570	-1.11432	0.000571758	0.00551536	49.0298	56.7285	68.2919	136.941	118.211	38.8075	37.6426	73.1095	RAB9B
ENSG00000123610	1.37489	3.60232e-05	0.000544196	230.622	219.546	93.6824	88.7979	69.2479	136.414	162.253	35.865	TNFAIP6
ENSG00000123685	1.05059	0.00166044	0.0130242	118.035	111.983	45.5279	41.7243	47.5642	127.006	136.292	106.216	BATF3
ENSG00000123689	2.33563	8.48311e-12	6.83697e-10	3743.52	4505.12	1306.3	1181.12	1060.4	7044.15	10668.4	1595.99	G0S2
ENSG00000123700	2.01368	2.7546e-07	7.84478e-06	78.9924	103.143	8.75537	22.4669	20.2847	49.3914	66.1991	23.4502	KCNJ2
ENSG00000123836	-1.08884	4.64606e-05	0.000672865	125.298	89.8815	198.747	267.463	241.318	103.487	80.4773	140.701	PFKFB2
ENSG00000123977	-1.84803	9.89714e-05	0.00126212	7.26367	2.94693	23.6395	32.0956	31.4763	11.7599	12.9802	33.1062	DAW1
ENSG00000124092	4.36078	7.78047e-06	0.000144652	35.4104	13.2612	0	1.06985	0	48.2154	15.5762	5.5177	CTCFL
ENSG00000124225	-2.26634	5.62669e-05	0.00079004	2.72388	7.36733	63.9142	82.3787	52.4605	25.8717	15.5762	42.7621	PMEPA1
ENSG00000124479	-2.72852	7.84505e-13	8.265e-11	78.9924	50.8346	440.395	512.46	377.716	50.5674	44.1327	160.013	NDP
ENSG00000124613	-2.25842	4.025e-05	0.000597413	6.35571	15.4714	62.1631	71.6802	51.7611	10.5839	9.08614	13.7942	ZNF391
ENSG00000124635	-1.67917	6.71699e-06	0.000128436	11.8035	13.2612	38.5236	71.6802	55.9579	21.1677	19.4703	40.0033	HIST1H2BJ
ENSG00000124721	-3.6907	7.84708e-18	1.8601e-15	11.8035	2.2102	101.562	112.335	144.092	15.2878	9.08614	120.01	DNAH8
ENSG00000124749	-1.71162	0.00150008	0.0120537	5.44776	5.89387	16.6352	35.3052	27.979	10.5839	6.4901	11.0354	COL21A1
ENSG00000125384	-1.18652	0.00435534	0.0279029	19.0671	19.8918	27.1416	23.5368	43.3674	14.1118	12.9802	59.3152	PTGER2
ENSG00000125510	2.23488	0.000176468	0.00203614	11.8035	27.2591	9.6309	7.48898	3.49737	44.6874	57.1129	9.65597	OPRL1
ENSG00000125538	1.3175	0.000894681	0.00788584	7829.33	9721.19	3958.3	5026.17	3263.75	6125.71	9841.59	1198.72	IL1B
ENSG00000125571	1.69321	0.00221325	0.0164859	16.3433	14.7347	3.50215	3.20956	6.29526	19.9918	9.08614	5.5177	IL37
ENSG00000125637	1.0282	0.0045168	0.0287091	184.316	118.614	135.708	97.3567	60.1548	290.468	163.551	77.2478	PSD4
ENSG00000125648	1.01859	0.000995857	0.00862559	305.982	294.693	262.661	220.39	131.501	556.241	477.672	191.74	SLC25A23
ENSG00000125744	1.86506	4.37145e-09	1.95732e-07	250.597	267.434	119.073	112.335	69.9474	493.914	481.566	108.975	RTN2
ENSG00000125810	1.09631	0.00560422	0.034012	60.8333	134.822	53.4077	57.7721	42.6679	61.1512	129.802	26.2091	CD93
ENSG00000125848	-1.1865	0.000512953	0.00505705	30.8706	36.0999	75.2962	81.3089	65.0511	17.6398	29.8545	40.0033	FLRT3
ENSG00000125968	-1.32808	0.000300118	0.00322937	397.686	492.875	806.369	1023.85	1324.8	531.545	774.918	2360.19	ID1
ENSG00000126010	-2.01117	1.12355e-06	2.68304e-05	10.8955	16.9449	51.6567	43.864	50.3621	4.70394	20.7683	70.3506	GRPR
ENSG00000126353	3.35489	7.59827e-11	4.97872e-09	43.582	76.6203	1.75107	7.48898	3.49737	49.3914	68.7951	12.4148	CCR7
ENSG00000126709	-1.39525	7.61225e-07	1.89063e-05	298.719	272.591	907.932	1338.39	993.952	470.394	559.447	962.838	IFI6
ENSG00000126752	3.43949	0.0037318	0.0247747	767.226	23.5755	81.4249	26.7463	58.0563	1205.38	35.0466	20.6914	SSX1
ENSG00000126822	-1.21981	0.00304598	0.0212179	51.7537	92.0917	216.258	217.18	249.013	131.71	194.703	409.689	PLEKHG3
ENSG00000126870	1.0612	6.90344e-10	3.63649e-08	498.47	556.97	309.064	204.342	250.412	579.761	532.188	274.505	WDR60
ENSG00000126950	-4.02012	3.314e-08	1.2113e-06	19.9751	0.736733	114.695	185.085	166.475	18.8158	1.29802	194.499	TMEM35A
ENSG00000126970	-1.75337	0.000162906	0.00189868	53.5696	108.3	191.743	261.044	247.614	17.6398	101.246	248.296	ZC4H2
ENSG00000127152	-2.25512	5.08278e-05	0.000727614	22.699	8.8408	189.991	133.732	83.2374	49.3914	16.8743	55.177	BCL11B
ENSG00000127325	-2.93474	4.6025e-06	9.27899e-05	5.44776	0.736733	20.1373	35.3052	51.0616	7.05591	10.3842	66.2124	BEST3
ENSG00000127399	2.36099	3.63536e-07	1.0034e-05	214.278	173.132	48.1545	44.9339	44.0669	462.162	469.883	121.389	LRRC61
ENSG00000127824	-1.03927	0.00702315	0.0402296	220.634	173.132	688.172	585.21	564.475	525.665	449.115	971.115	TUBA4A
ENSG00000127914	1.04926	6.22667e-12	5.28251e-10	2683.93	2592.56	1257.27	1027.06	1172.32	2154.41	2036.59	1118.71	AKAP9
ENSG00000127946	1.03037	4.81561e-08	1.68755e-06	2530.48	2465.11	1693.29	1100.88	1141.54	2767.09	2518.16	1095.26	HIP1
ENSG00000127957	1.03801	1.46035e-05	0.000250419	76.2686	76.6203	28.0172	38.5147	41.9684	79.967	81.7753	45.521	PMS2P3
ENSG00000128016	1.27192	0.000181834	0.00208611	387.699	342.581	169.854	156.199	190.257	743.223	552.957	324.165	ZFP36
ENSG00000128165	-2.14615	0.00376459	0.0249205	5.44776	0	14.0086	22.4669	18.8858	10.5839	5.19208	35.865	ADM2
ENSG00000128266	1.50811	0.00188479	0.0145017	35.4104	25.0489	23.6395	17.1177	7.69421	72.9111	44.1327	13.7942	GNAZ
ENSG00000128271	1.39927	0.00660237	0.0385227	20.8831	11.7877	4.37768	10.6985	5.59579	28.2236	20.7683	11.0354	ADORA2A
ENSG00000128274	1.18808	0.0014164	0.0114975	175.236	151.03	127.828	124.103	84.6363	326.924	428.347	137.942	A4GALT
ENSG00000128342	1.12065	0.00713863	0.0407175	917.039	1116.15	396.618	346.633	514.813	1360.62	1878.24	1168.37	LIF
ENSG00000128510	-2.75311	7.51818e-12	6.18293e-10	125.298	78.0937	518.318	473.945	838.669	175.222	66.1991	1166.99	CPA4
ENSG00000128573	2.10563	3.70506e-07	1.01915e-05	216.094	178.289	72.6695	20.3272	34.9737	141.118	127.206	24.8296	FOXP2
ENSG00000128596	1.01603	3.55938e-10	1.98525e-08	311.43	313.848	175.107	130.522	156.682	351.62	290.757	164.151	CCDC136
ENSG00000128655	-1.82196	3.70694e-11	2.59792e-09	20.8831	19.8918	63.9142	75.9596	81.8384	21.1677	18.1723	60.6947	PDE11A
ENSG00000128683	-4.32317	3.16772e-07	8.91107e-06	0	0	13.1331	32.0956	32.1758	3.52796	2.59604	27.5885	GAD1
ENSG00000128849	-1.18568	0.000520706	0.00511856	25.4229	20.6285	40.2747	62.0515	85.3358	35.2796	32.4505	67.5918	CGNL1
ENSG00000129048	1.89313	4.06771e-07	1.10458e-05	253.321	211.442	77.0472	49.2133	41.269	129.358	133.696	27.5885	ACKR4
ENSG00000129422	-1.4926	4.45571e-06	9.02463e-05	29.0547	25.7857	96.309	89.8677	88.1337	36.4555	23.3644	45.521	MTUS1
ENSG00000129514	-1.84277	8.83796e-12	7.05243e-10	32.6865	32.4163	93.6824	99.4964	116.812	35.2796	29.8545	160.013	FOXA1
ENSG00000129596	-2.02482	4.43904e-07	1.19454e-05	8.17163	17.6816	57.7854	71.6802	55.9579	8.2319	22.0664	41.3827	CDO1
ENSG00000129667	1.03158	0.00667984	0.0388552	495.746	513.503	483.296	423.662	340.644	1364.14	1257.78	528.319	RHBDF2
ENSG00000130066	1.18816	7.7851e-13	8.25579e-11	2379.76	2552.04	1104.05	834.486	991.154	1832.19	2192.36	1001.46	SAT1
ENSG00000130158	1.54159	0.000158683	0.00186157	672.798	727.892	385.236	273.883	271.396	1539.36	1648.49	646.95	DOCK6
ENSG00000130176	1.46029	2.18918e-08	8.32251e-07	2057.44	1844.78	916.687	1023.85	844.265	3798.43	2929.63	1078.71	CNN1
ENSG00000130303	-1.30358	0.00752839	0.0425193	279.651	112.72	708.309	927.563	575.667	450.402	160.955	263.47	BST2
ENSG00000130433	2.93257	0.00144565	0.0116907	9.98755	13.2612	0.875537	1.06985	2.7979	38.8075	72.6892	13.7942	CACNG6
ENSG00000130518	2.14387	0.00832296	0.0460865	18.1592	25.0489	6.12876	0	6.99474	68.2071	46.7287	23.4502	IQCN
ENSG00000130649	1.24897	0.000283921	0.00307815	70.8208	95.7753	28.8927	17.1177	48.9632	69.3831	73.9872	34.4856	CYP2E1
ENSG00000130702	3.98533	3.11296e-12	2.81898e-10	229.714	421.411	31.5193	23.5368	27.979	570.353	1361.62	81.386	LAMA5
ENSG00000130720	2.17474	6.80835e-05	0.000925638	246.965	172.396	132.206	56.7023	65.7505	805.55	694.441	171.049	FIBCD1
ENSG00000130762	3.9433	1.83705e-13	2.22642e-11	65.3731	61.1489	12.2575	5.34927	4.89632	194.038	115.524	5.5177	ARHGEF16
ENSG00000131386	1.14994	0.0068702	0.0396352	4285.57	2955.04	2763.19	1993.14	1328.3	4845.06	2772.57	609.705	GALNT15
ENSG00000131459	1.67729	8.41669e-17	1.78511e-14	1186.7	1411.58	476.292	412.964	377.716	1014.88	1425.23	306.232	GFPT2
ENSG00000131979	-1.44317	0.000113738	0.00142009	23.6069	25.7857	51.6567	98.4266	65.7505	23.5197	19.4703	35.865	GCH1
ENSG00000132000	2.40399	5.57135e-06	0.000109911	111.679	103.143	41.1502	11.7684	32.1758	251.661	316.717	63.4535	PODNL1
ENSG00000132003	1.2769	0.00100478	0.0086749	636.479	576.125	403.622	361.611	346.939	1605.22	1396.67	627.638	ZSWIM4
ENSG00000132010	-1.1722	0.00294328	0.0206993	19.9751	14.7347	23.6395	28.8861	32.1758	10.5839	9.08614	41.3827	ZNF20
ENSG00000132185	-1.42095	1.88793e-05	0.000308971	41.7661	33.153	155.846	115.544	87.4342	57.6233	31.1525	77.2478	FCRLA
ENSG00000132205	-3.56672	4.96583e-20	1.42936e-17	13.6194	27.2591	250.403	350.912	249.013	15.2878	48.0268	371.065	EMILIN2
ENSG00000132424	1.03282	0.00049725	0.00493242	7700.4	7396.06	2327.18	2528.06	3637.26	4153.58	3786.33	2767.12	PNISR
ENSG00000132623	-6.73506	2.56264e-12	2.40158e-10	0	0	78.7983	140.151	68.5484	2.35197	1.29802	37.2445	ANKEF1
ENSG00000132688	3.26097	5.97432e-49	1.20375e-45	1948.48	2692.02	227.64	217.18	219.635	1511.14	2550.61	244.158	NES
ENSG00000132718	1.80772	7.32037e-06	0.00013817	1206.68	1108.05	564.721	279.232	213.34	923.148	931.979	132.425	SYT11
ENSG00000132793	1.64823	1.56743e-07	4.86501e-06	296.903	299.114	135.708	87.728	84.6363	485.682	436.135	177.946	LPIN3
ENSG00000132846	-1.05294	0.000905938	0.00797968	39.9502	22.8387	80.5494	56.7023	74.1442	49.3914	25.9604	73.1095	ZBED3
ENSG00000132849	-1.52356	3.61447e-14	5.02255e-12	73.5447	69.9897	189.991	230.019	182.563	56.4473	66.1991	165.531	PATJ
ENSG00000132972	-3.13976	9.22551e-06	0.000168601	187.04	18.4183	995.485	1097.67	823.281	150.526	16.8743	369.686	RNF17
ENSG00000133019	-1.94524	2.42524e-13	2.81241e-11	127.114	107.563	380.858	491.063	419.684	117.599	62.305	310.37	CHRM3
ENSG00000133048	4.96238	1.23429e-12	1.22812e-10	72.6367	26.5224	1.75107	3.20956	0.699474	63.5032	48.0268	1.37942	CHI3L1
ENSG00000133101	-3.30474	2.57807e-07	7.40746e-06	4.5398	0.736733	27.1416	40.6544	21.6837	4.70394	1.29802	19.3119	CCNA1
ENSG00000133105	1.67572	0.00578858	0.0349069	43.582	35.3632	12.2575	6.41912	8.39369	17.6398	7.78812	5.5177	RXFP2
ENSG00000133110	1.69918	4.47641e-05	0.000652989	9004.23	6638.7	3305.15	1773.82	1604.59	5303.69	3648.74	889.729	POSTN
ENSG00000133216	-4.08779	3.7203e-24	1.71336e-21	27.2388	22.8387	710.06	882.629	770.121	70.5591	80.4773	1012.5	EPHB2
ENSG00000133466	1.13677	0.00049951	0.0049457	139.826	117.141	88.4292	56.7023	69.2479	245.781	207.683	108.975	C1QTNF6
ENSG00000133561	2.79641	1.55876e-08	6.16238e-07	98.0596	69.2529	7.87983	3.20956	13.9895	70.5591	110.332	26.2091	GIMAP6
ENSG00000133624	1.79525	1.70073e-15	2.88568e-13	356.828	326.373	81.4249	75.9596	93.7295	346.916	318.015	140.701	ZNF767P
ENSG00000134198	-1.60085	0.000241003	0.00267912	19.0671	13.9979	52.5322	73.8199	37.7716	14.1118	14.2782	22.0708	TSPAN2
ENSG00000134215	-2.58791	0.00236996	0.0173721	0	0.736733	22.764	23.5368	17.4868	8.2319	3.89406	8.27655	VAV3
ENSG00000134245	1.61227	1.07569e-06	2.58791e-05	194.303	160.608	67.4163	24.6066	50.3621	157.582	155.762	77.2478	WNT2B
ENSG00000134259	-1.88139	2.38517e-05	0.000380282	33.5945	39.7836	129.579	181.875	162.977	64.6792	94.7555	379.342	NGF
ENSG00000134339	-4.40326	2.10976e-09	9.8858e-08	9.07959	8.8408	291.554	487.853	317.561	23.5197	11.6822	17.9325	SAA2
ENSG00000134548	-4.37891	8.16943e-20	2.15874e-17	19.9751	11.7877	215.382	296.35	279.09	8.2319	2.59604	121.389	SPX
ENSG00000134602	-1.12405	0.0018399	0.0142173	718.196	668.954	1313.31	1560.92	1310.81	402.187	385.512	557.287	STK26
ENSG00000134716	-1.5491	2.80537e-10	1.62661e-08	43.582	42.7305	98.9356	132.662	124.506	27.0477	45.4307	110.354	CYP2J2
ENSG00000134755	-4.64803	3.62865e-09	1.62925e-07	1.81592	1.47347	168.979	180.805	125.905	16.4638	1.29802	35.865	DSC2
ENSG00000134762	-3.21019	7.45066e-14	9.60777e-12	147.997	133.349	1195.11	1606.92	1138.74	102.311	79.1793	350.374	DSC3
ENSG00000134853	2.11532	1.69905e-10	1.04931e-08	3713.55	3657.14	1202.11	503.901	535.797	2406.07	2509.07	593.152	PDGFRA
ENSG00000135052	-1.31767	2.01099e-17	4.69784e-15	1499.95	1477.15	3268.38	3749.84	3772.26	1271.24	1226.63	2860.93	GOLM1
ENSG00000135069	-1.38977	8.99328e-16	1.62617e-13	740.895	662.323	1728.31	2019.88	1795.55	655.024	576.321	1361.49	PSAT1
ENSG00000135114	-3.00886	6.0757e-05	0.000843534	1.81592	0.736733	66.5408	110.195	48.2637	16.4638	16.8743	53.7975	OASL
ENSG00000135164	1.34403	1.86869e-06	4.16683e-05	3247.77	3161.32	954.335	905.096	1298.92	1831.01	1793.86	793.169	DMTF1
ENSG00000135205	1.45439	1.69408e-05	0.000284447	162.525	137.032	62.1631	33.1655	35.6732	108.191	73.9872	45.521	CCDC146
ENSG00000135298	-1.96334	5.59562e-13	6.07792e-11	49.0298	47.1509	118.197	187.224	236.422	43.5115	50.6228	200.017	ADGRB3
ENSG00000135312	2.34239	1.38502e-05	0.000239283	19.9751	16.2081	4.37768	2.13971	3.49737	18.8158	16.8743	4.13827	HTR1B
ENSG00000135324	-4.34402	2.13135e-22	7.63449e-20	3.63184	6.6306	69.1674	87.728	119.61	4.70394	2.59604	95.1803	MRAP2
ENSG00000135373	-2.50446	7.19786e-06	0.000136443	292.363	244.595	1701.17	2351.54	1432.52	236.373	227.154	191.74	EHF
ENSG00000135472	1.49605	0.00806594	0.0449412	21.791	25.0489	18.3863	4.27942	12.5905	70.5591	44.1327	22.0708	FAIM2
ENSG00000135473	1.082	3.5205e-20	1.05087e-17	868.009	922.39	417.631	394.776	407.094	880.813	915.105	478.66	PAN2
ENSG00000135549	-1.8216	1.93389e-05	0.000314839	14.5273	27.2591	83.176	80.239	59.4553	10.5839	19.4703	33.1062	PKIB
ENSG00000135636	-2.99071	1.57365e-16	3.21085e-14	24.5149	25.7857	219.76	293.14	262.303	38.8075	63.603	422.104	DYSF
ENSG00000135750	-1.06096	9.56594e-07	2.32569e-05	191.579	157.661	414.129	489.993	442.067	277.533	247.922	471.763	KCNK1
ENSG00000135914	3.41899	5.61445e-15	8.96033e-13	112.587	65.5693	11.382	6.41912	5.59579	95.2548	50.6228	6.89712	HTR2B
ENSG00000135976	1.12806	0.00281428	0.0199303	674.614	731.576	185.614	149.78	349.037	421.003	294.651	286.92	ANKRD36
ENSG00000136114	-1.49862	3.40106e-05	0.000518164	39.9502	58.2019	70.9185	126.243	130.802	47.0394	46.7287	217.949	THSD1
ENSG00000136167	-1.46337	0.00309839	0.0214624	783.569	450.144	2035.62	2635.05	1597.6	669.136	502.334	362.789	LCP1
ENSG00000136193	-1.04207	7.74811e-11	5.05635e-09	2729.33	2496.05	5399.43	6249.02	5283.83	2849.41	2275.43	4379.67	SCRN1
ENSG00000136237	-1.52261	4.45421e-05	0.000650928	14.5273	20.6285	55.1588	78.0993	67.849	21.1677	25.9604	31.7268	RAPGEF5
ENSG00000136244	1.94404	1.96663e-07	5.89222e-06	8801.76	9928.95	2561.82	2984.89	2183.06	6235.07	7893.26	808.343	IL6
ENSG00000136275	-1.36476	0.000565457	0.00546767	18.1592	25.0489	45.5279	64.1912	43.3674	17.6398	9.08614	30.3473	C7orf69
ENSG00000136457	1.27188	0.00491571	0.0307595	32.6865	21.3653	17.5107	8.55883	9.09316	49.3914	29.8545	20.6914	CHAD
ENSG00000136859	1.21523	2.65109e-05	0.00041732	1839.53	1567.77	1288.79	1050.6	795.302	3250.42	2440.28	782.134	ANGPTL2
ENSG00000136999	-1.26355	0.000791183	0.00718889	109.863	125.981	307.313	366.96	276.292	74.0871	132.398	110.354	NOV
ENSG00000137070	1.04565	0.00551459	0.0336448	259.676	313.112	138.335	127.313	151.786	448.05	520.506	331.062	IL11RA
ENSG00000137142	-2.4292	1.59423e-06	3.63472e-05	6.35571	2.94693	27.1416	27.8162	40.5695	12.9358	3.89406	41.3827	IGFBPL1
ENSG00000137462	2.58464	3.20971e-08	1.18311e-06	30.8706	35.3632	6.12876	3.20956	4.89632	21.1677	37.6426	6.89712	TLR2
ENSG00000137561	-3.31489	2.4048e-10	1.43037e-08	1.81592	4.4204	32.3949	39.5846	35.6732	5.87993	1.29802	27.5885	TTPA
ENSG00000137573	2.42427	4.66713e-14	6.32181e-12	5916.26	6122.25	1001.61	483.574	995.351	4375.84	4680.66	1451.15	SULF1
ENSG00000137809	1.4468	2.42301e-07	6.99938e-06	4167.53	4868.33	2845.49	1518.12	1461.9	5242.54	7123.54	2024.99	ITGA11
ENSG00000137819	1.68656	6.56511e-05	0.000896805	84.4402	75.1468	16.6352	17.1177	24.4816	42.3355	31.1525	13.7942	PAQR5
ENSG00000137959	-2.0269	4.49376e-07	1.20725e-05	108.047	83.9876	422.009	447.199	353.234	67.0312	70.0931	120.01	IFI44L
ENSG00000137965	-1.40242	7.15621e-06	0.000135867	245.149	262.277	683.794	825.927	637.221	226.965	190.809	299.335	IFI44
ENSG00000138080	1.22157	0.00562171	0.0340691	7826.61	7245.77	5761.03	4162.8	4250.7	21295.9	19662.4	9853.23	EMILIN1
ENSG00000138131	1.55083	5.19371e-05	0.000740863	1378.28	931.968	830.009	310.258	309.167	2035.63	1227.93	452.451	LOXL4
ENSG00000138356	-1.28933	9.16709e-17	1.91902e-14	2745.67	2826.11	6646.2	7192.63	6566.66	2288.47	2606.43	5178.36	AOX1
ENSG00000138606	1.70243	0.00356374	0.0238951	12.7114	11.7877	4.37768	5.34927	2.09842	19.9918	22.0664	9.65597	SHF
ENSG00000138623	-1.13481	5.6927e-05	0.000798613	3107.94	3085.44	7875.45	9088.41	8348.22	5173.16	5828.11	12441	SEMA7A
ENSG00000138642	-1.33756	9.78083e-05	0.00125224	215.186	236.491	584.859	648.331	509.217	166.99	157.061	219.328	HERC6
ENSG00000138646	-1.79781	3.23358e-07	9.08049e-06	109.863	89.8815	327.451	421.522	337.846	89.3749	63.603	140.701	HERC5
ENSG00000138678	-1.35539	8.37922e-08	2.76206e-06	78.9924	95.0386	150.592	180.805	251.811	82.319	75.2852	268.988	GPAT3
ENSG00000138735	1.05803	0.00316326	0.0217948	1085.01	1197.93	442.146	427.942	416.187	446.874	530.89	280.023	PDE5A
ENSG00000138759	-3.37546	4.26481e-22	1.46265e-19	13.6194	11.051	104.189	169.037	142.693	15.2878	9.08614	92.4214	FRAS1
ENSG00000138772	-2.90883	4.84391e-24	2.16886e-21	42.6741	35.3632	300.309	396.916	274.893	41.1595	35.0466	184.843	ANXA3
ENSG00000138821	-1.19702	0.000124551	0.00153724	594.713	469.299	1160.09	1357.64	1145.04	433.939	338.783	549.011	SLC39A8
ENSG00000139178	1.05554	0.000333824	0.0035331	683.693	772.833	581.356	397.986	304.271	777.326	920.297	231.743	C1RL
ENSG00000139190	1.44546	4.03474e-06	8.28483e-05	399.502	422.885	138.335	96.2868	172.77	462.162	549.063	267.608	VAMP1
ENSG00000139194	1.5576	9.83558e-09	4.06512e-07	70.8208	67.7795	20.1373	19.2574	29.3779	75.2631	81.7753	31.7268	RBP5
ENSG00000139269	-1.8533	4.71187e-06	9.45836e-05	59.9253	29.4693	187.365	257.835	179.065	81.143	32.4505	106.216	INHBE
ENSG00000139344	-2.54342	0.00034704	0.00364664	5.44776	0	25.3906	18.1875	14.689	2.35197	5.19208	13.7942	AMDHD1
ENSG00000139597	1.35691	4.68251e-07	1.24963e-05	68.0969	95.0386	31.5193	28.8861	25.1811	74.0871	62.305	33.1062	N4BP2L1
ENSG00000139631	1.10102	0.00613773	0.036534	263.308	271.118	86.6781	70.6104	132.9	321.044	333.591	266.229	CSAD
ENSG00000139737	-2.34891	1.61406e-06	3.67472e-05	3.63184	2.94693	28.8927	31.0258	25.8805	7.05591	11.6822	35.865	SLAIN1
ENSG00000139832	-1.2839	0.000217911	0.00245459	11.8035	18.4183	39.3992	35.3052	30.7769	11.7599	19.4703	45.521	RAB20
ENSG00000139899	1.06754	9.54529e-05	0.00122731	122.574	150.294	78.7983	63.1214	62.9526	186.982	197.299	110.354	CBLN3
ENSG00000139970	-2.7333	4.87787e-21	1.51204e-18	47.2139	54.5183	332.704	482.504	452.56	51.7434	103.842	427.621	RTN1
ENSG00000139971	-1.09872	7.00179e-05	0.000945242	207.923	257.857	485.923	470.736	460.254	139.942	180.425	268.988	C14orf37
ENSG00000139973	-1.04568	0.00301855	0.0210959	183.408	191.551	202.249	227.879	427.379	90.5509	106.438	326.924	SYT16
ENSG00000140092	1.01984	0.000355394	0.0037247	643.743	540.762	527.949	302.769	281.888	981.948	838.521	368.306	FBLN5
ENSG00000140093	2.87007	5.31316e-08	1.83389e-06	81.7163	50.8346	5.25322	6.41912	9.79263	30.5756	28.5565	4.13827	SERPINA10
ENSG00000140285	1.62331	0.00085529	0.00763368	4289.2	4800.55	1391.23	1554.5	1121.96	2062.68	2287.11	293.817	FGF7
ENSG00000140398	1.61739	0.00354438	0.0237851	120.759	82.5141	28.0172	12.8382	32.1758	172.87	151.868	100.698	NEIL1
ENSG00000140465	-2.65002	1.86899e-06	4.16683e-05	6.35571	2.2102	19.2618	18.1875	32.1758	3.52796	5.19208	37.2445	CYP1A1
ENSG00000140807	-1.68485	0.00419978	0.0270785	4.5398	2.94693	33.2704	22.4669	23.0826	16.4638	6.4901	15.1737	NKD1
ENSG00000141337	1.60843	7.53152e-09	3.17803e-07	128.022	171.659	42.0258	40.6544	35.6732	92.9028	105.14	46.9004	ARSG
ENSG00000141338	3.16635	6.74801e-10	3.58981e-08	269.664	111.247	21.8884	12.8382	12.5905	205.797	54.5169	24.8296	ABCA8
ENSG00000141378	-1.20871	5.4622e-09	2.39905e-07	326.865	251.963	717.94	617.306	607.143	236.373	225.856	464.866	PTRH2
ENSG00000141384	-1.3189	2.79026e-07	7.93232e-06	128.93	97.9855	289.803	303.838	254.608	116.423	71.3911	187.602	TAF4B
ENSG00000141449	-1.32517	7.65652e-06	0.000143114	71.7288	57.4652	107.691	113.405	166.475	59.9753	37.6426	184.843	GREB1L
ENSG00000141469	1.87144	7.33669e-05	0.000982227	1775.06	699.16	567.348	373.379	263.002	2015.64	619.156	191.74	SLC14A1
ENSG00000141736	1.05466	0.000256408	0.00281351	1381.91	1360.01	1026.13	771.365	645.614	2333.15	2362.4	1138.02	ERBB2
ENSG00000142102	1.76814	9.02464e-07	2.21159e-05	301.442	293.22	119.949	120.893	111.216	635.032	651.606	201.396	PGGHG
ENSG00000142156	1.56636	6.33786e-06	0.000122494	27910.7	27215.7	18174.4	12975.2	10521.5	60217.5	60566.9	17727	COL6A1
ENSG00000142173	1.43774	7.9317e-05	0.00104882	34523.3	34501.2	24917.8	18038.8	15282.8	78668.7	82721.6	26817.4	COL6A2
ENSG00000142185	-1.87275	3.91398e-05	0.000583082	84.4402	58.9387	297.682	332.725	299.375	206.973	107.736	744.889	TRPM2
ENSG00000142303	2.5122	5.14478e-05	0.000735835	107.139	158.398	13.1331	9.62868	38.4711	221.085	320.611	81.386	ADAMTS10
ENSG00000142621	-4.42805	2.57963e-62	2.07905e-58	18.1592	21.3653	462.283	604.467	607.843	38.8075	24.6624	503.49	FHAD1
ENSG00000143061	-2.39508	7.02507e-28	5.14714e-25	138.01	181.973	875.537	1151.16	874.342	191.686	168.743	674.538	IGSF3
ENSG00000143127	1.23343	0.000894158	0.00788584	137.102	88.408	77.9228	31.0258	32.8753	146.998	124.61	70.3506	ITGA10
ENSG00000143162	-1.88578	1.94434e-10	1.17823e-08	293.271	255.646	738.077	1018.5	948.487	161.11	166.147	539.355	CREG1
ENSG00000143195	-3.68221	2.63157e-11	1.88526e-09	2.72388	5.15713	124.326	186.155	148.288	22.3437	12.9802	77.2478	ILDR2
ENSG00000143469	2.68119	2.41583e-06	5.25214e-05	52.6616	67.0427	12.2575	5.34927	3.49737	17.6398	40.2386	6.89712	SYT14
ENSG00000143494	-1.14685	0.000543121	0.00529297	82.6243	137.769	215.382	231.088	202.847	51.7434	80.4773	135.184	VASH2
ENSG00000143630	1.32851	0.00207416	0.0156377	111.679	76.6203	37.6481	26.7463	44.0669	159.934	159.657	95.1803	HCN3
ENSG00000143816	-2.72054	1.89254e-06	4.20192e-05	3.63184	2.2102	39.3992	38.5147	26.58	11.7599	2.59604	23.4502	WNT9A
ENSG00000143845	-1.20895	0.00147031	0.0118618	45.398	93.5651	154.97	171.177	167.874	84.6709	131.1	325.544	ETNK2
ENSG00000143850	-2.44949	1.78971e-10	1.09633e-08	61.7412	57.4652	245.15	289.93	392.405	96.4308	88.2654	728.336	PLEKHA6
ENSG00000143995	1.25666	1.35391e-21	4.5466e-19	2465.11	2488.68	876.412	931.843	1058.3	2200.27	2049.57	986.288	MEIS1
ENSG00000144026	1.00214	1.5585e-05	0.000264715	666.442	617.382	203.125	258.905	317.561	445.698	463.393	317.268	ZNF514
ENSG00000144057	-1.69089	1.15454e-05	0.000204956	67.189	46.4142	102.438	109.125	232.225	63.5032	38.9406	255.193	ST6GAL2
ENSG00000144191	-3.13662	3.2466e-07	9.1012e-06	9.98755	0.736733	43.7768	38.5147	30.0774	5.87993	1.29802	45.521	CNGA3
ENSG00000144218	-2.68239	1.54154e-24	8.28271e-22	32.6865	38.3101	267.039	341.283	285.385	58.7993	44.1327	211.052	AFF3
ENSG00000144230	1.31468	0.00422399	0.0271911	19.0671	23.5755	9.6309	9.62868	10.4921	45.8634	35.0466	20.6914	GPR17
ENSG00000144285	-1.87909	0.000459893	0.00464475	7.26367	6.6306	23.6395	10.6985	30.0774	4.70394	3.89406	19.3119	SCN1A
ENSG00000144724	-1.15081	0.000195309	0.00222136	1263.88	1317.28	2865.63	2718.5	2291.48	856.117	713.911	1344.94	PTPRG
ENSG00000144730	-1.31379	0.00192479	0.014746	105.323	260.067	443.022	429.011	374.918	64.6792	160.955	224.846	IL17RD
ENSG00000144802	1.25095	9.37305e-10	4.78114e-08	5498.6	5283.11	1681.03	2058.4	2237.62	3819.6	3701.95	1713.24	NFKBIZ
ENSG00000144821	-1.45113	1.19364e-07	3.79493e-06	52.6616	36.8367	123.451	162.618	118.211	52.9193	38.9406	89.6626	MYH15
ENSG00000144959	-1.02605	6.45358e-05	0.000886238	2392.47	2734.75	3889.13	4915.98	5020.12	1445.29	1821.12	3271.99	NCEH1
ENSG00000145040	1.40632	0.000142385	0.00170386	98.9676	136.296	38.5236	32.0956	52.4605	139.942	188.213	91.042	UCN2
ENSG00000145242	-1.67777	3.32336e-08	1.21197e-06	175.236	161.345	408	455.758	517.611	105.839	80.4773	297.956	EPHA5
ENSG00000145284	-1.03106	2.26669e-10	1.35321e-08	811.716	954.806	1617.12	1540.59	1682.93	637.384	722.998	1557.37	SCD5
ENSG00000145358	-1.80188	6.89241e-05	0.000932519	114.403	153.977	541.957	407.614	328.753	84.6709	51.9208	137.942	DDIT4L
ENSG00000145506	3.38179	2.71965e-05	0.00042644	252.413	428.779	170.73	20.3272	11.8911	453.93	1130.58	13.7942	NKD2
ENSG00000145536	-1.80666	4.45661e-06	9.02463e-05	8.17163	6.6306	31.5193	40.6544	30.0774	11.7599	11.6822	27.5885	ADAMTS16
ENSG00000145703	-2.73038	3.23262e-12	2.91098e-10	9.07959	14.7347	89.3047	116.614	76.9421	11.7599	14.2782	46.9004	IQGAP2
ENSG00000145777	-1.32448	1.81316e-05	0.000298228	19.0671	23.5755	52.5322	79.1692	59.4553	22.3437	31.1525	46.9004	TSLP
ENSG00000145990	-1.41465	6.889e-10	3.63649e-08	69.0049	93.5651	182.987	257.835	185.361	70.5591	94.7555	251.055	GFOD1
ENSG00000146072	-1.35469	8.82153e-14	1.11964e-11	789.017	909.866	2407.73	2613.65	2255.8	786.734	1146.15	2004.3	TNFRSF21
ENSG00000146197	-1.02286	0.0086742	0.0475415	1722.4	2266.19	2018.99	2500.25	4277.98	1589.93	2252.07	7116.45	SCUBE3
ENSG00000146233	-1.51632	0.00239447	0.0175015	12.7114	11.7877	23.6395	47.0736	25.1811	5.87993	7.78812	15.1737	CYP39A1
ENSG00000146281	-1.45322	9.34098e-06	0.000170518	912.499	869.345	1759.83	2302.33	2108.21	510.378	404.982	1220.79	PM20D2
ENSG00000146416	-1.04394	5.35176e-18	1.28754e-15	1108.62	1035.85	2083.78	2324.79	2317.36	970.188	1092.93	1946.37	AIG1
ENSG00000146477	-4.70722	5.53414e-15	8.92049e-13	1.81592	0.736733	67.4163	84.5185	76.9421	4.70394	3.89406	35.865	SLC22A3
ENSG00000146592	-1.54537	1.71566e-11	1.32319e-09	201.567	177.553	503.434	591.629	537.895	185.806	122.014	375.203	CREB5
ENSG00000146828	1.3587	0.00468792	0.0295424	298.719	288.799	146.215	125.173	123.107	656.2	758.044	387.618	SLC12A9
ENSG00000146830	1.47028	6.79259e-05	0.0009253	1065.94	1126.47	459.657	368.03	389.607	1828.66	1963.91	944.906	GIGYF1
ENSG00000146856	1.52033	0.00054402	0.00529532	69.0049	80.3039	22.764	12.8382	29.3779	32.9276	42.8347	12.4148	AGBL3
ENSG00000146904	1.54433	0.000145811	0.00173712	57.2014	58.9387	8.75537	17.1177	20.2847	69.3831	51.9208	37.2445	EPHA1
ENSG00000147036	-3.51632	1.66011e-24	8.63204e-22	8.17163	8.10407	95.4335	108.055	144.791	9.40788	15.5762	107.595	LANCL3
ENSG00000147041	-2.23846	8.46203e-12	6.83697e-10	57.2014	52.3081	230.266	216.11	249.013	21.1677	46.7287	146.219	SYTL5
ENSG00000147160	-1.7195	0.00375956	0.0249179	4.5398	4.4204	24.515	10.6985	12.5905	3.52796	5.19208	9.65597	AWAT2
ENSG00000147168	-2.67535	1.21262e-05	0.00021269	3.63184	1.47347	40.2747	36.375	28.6784	9.40788	5.19208	13.7942	IL2RG
ENSG00000147174	1.37602	0.000129516	0.00158637	125.298	59.6754	28.8927	21.3971	39.1705	96.4308	77.8812	49.6593	GCNA
ENSG00000147206	-3.08875	1.07056e-10	6.90257e-09	2.72388	10.3143	36.7725	69.5405	57.3569	7.05591	3.89406	46.9004	NXF3
ENSG00000147408	2.14639	3.48026e-17	7.79144e-15	739.079	774.307	206.627	206.482	141.294	644.44	743.766	99.3185	CSGALNACT1
ENSG00000147437	1.29315	0.00156341	0.0124309	110.771	92.0917	21.8884	23.5368	44.0669	59.9753	40.2386	34.4856	GNRH1
ENSG00000147576	1.58884	5.89205e-06	0.00011498	55.3855	61.1489	9.6309	16.0478	19.5853	50.5674	50.6228	28.9679	ADHFE1
ENSG00000147642	-1.97641	0.00252893	0.0183044	3.63184	1.47347	28.0172	18.1875	25.1811	15.2878	10.3842	45.521	SYBU
ENSG00000148344	1.78167	0.000597265	0.00569678	24.5149	24.3122	15.7597	2.13971	9.79263	38.8075	35.0466	6.89712	PTGES
ENSG00000148426	-3.62729	2.11187e-08	8.10504e-07	0.907959	2.2102	57.7854	59.9118	59.4553	15.2878	6.4901	117.251	PROSER2
ENSG00000148483	-2.64437	2.24723e-10	1.34658e-08	13.6194	6.6306	56.0343	65.2611	74.8437	10.5839	6.4901	35.865	TMEM236
ENSG00000148677	-3.06563	1.63931e-30	1.39074e-27	164.341	173.869	800.241	1142.6	1491.98	122.302	105.14	1321.49	ANKRD1
ENSG00000149090	1.87659	4.3083e-17	9.25941e-15	936.106	865.662	374.73	273.883	265.8	1364.14	1279.85	295.197	PAMR1
ENSG00000149294	-3.70563	2.27895e-14	3.33949e-12	6.35571	4.4204	134.833	231.088	146.19	16.4638	23.3644	121.389	NCAM1
ENSG00000149380	1.45135	2.30308e-05	0.000369893	206.107	236.491	159.348	82.3787	70.6469	285.764	281.67	55.177	P4HA3
ENSG00000149451	1.29674	0.00631844	0.0373339	1284.76	1169.93	532.326	427.942	599.449	2669.49	2685.6	1620.82	ADAM33
ENSG00000149557	-2.12724	9.07966e-16	1.62617e-13	226.99	153.977	840.515	1183.26	972.968	281.06	180.425	677.297	FEZ1
ENSG00000149573	-1.26583	0.00033885	0.00357689	98.0596	109.773	283.674	315.607	248.313	91.7269	93.4575	96.5597	MPZL2
ENSG00000149591	1.02842	4.74604e-08	1.67034e-06	38547.4	34915.3	24457.2	21302.9	18731.2	52840.5	49485.7	21687.3	TAGLN
ENSG00000149968	1.06764	0.00822862	0.0456582	93.5198	139.243	51.6567	64.1912	39.1705	50.5674	90.8614	23.4502	MMP3
ENSG00000149970	-2.17896	7.93887e-20	2.13278e-17	47.2139	33.8897	135.708	172.246	193.055	37.6315	32.4505	186.222	CNKSR2
ENSG00000149972	-2.16942	9.73878e-05	0.00124785	3.63184	2.94693	16.6352	32.0956	38.4711	11.7599	7.78812	24.8296	CNTN5
ENSG00000150281	1.38539	0.0015366	0.0122616	105.323	89.1447	57.7854	41.7243	41.269	222.261	221.962	104.836	CTF1
ENSG00000150471	-1.85304	2.3104e-05	0.000370239	365	609.278	2219.49	1595.15	1343.69	205.797	406.28	575.22	ADGRL3
ENSG00000150722	-3.9136	2.06164e-11	1.5385e-09	1.81592	1.47347	48.1545	89.8677	83.2374	4.70394	11.6822	51.0387	PPP1R1C
ENSG00000151012	-1.51734	1.34312e-06	3.14677e-05	1121.33	974.698	1959.45	2454.24	2976.96	659.728	459.499	1819.46	SLC7A11
ENSG00000151014	-1.53019	2.54467e-15	4.22862e-13	112.587	120.088	343.21	447.199	370.022	166.99	142.782	400.033	NOCT
ENSG00000151224	-2.71128	0.00031238	0.00333903	3.63184	0.736733	42.9013	55.6324	28.6784	8.2319	9.08614	8.27655	MAT1A
ENSG00000151322	-2.1251	0.000332702	0.00352354	2.72388	2.94693	32.3949	16.0478	12.5905	7.05591	6.4901	19.3119	NPAS3
ENSG00000151364	-3.49552	1.82446e-11	1.4004e-09	8.17163	2.94693	63.0386	27.8162	63.6521	3.52796	3.89406	55.177	KCTD14
ENSG00000151790	1.65253	0.000975641	0.00848239	17.2512	19.1551	5.25322	3.20956	5.59579	14.1118	14.2782	6.89712	TDO2
ENSG00000151892	-1.83348	0.00854408	0.0470124	5.44776	1.47347	46.4034	60.9817	36.3726	31.7516	15.5762	45.521	GFRA1
ENSG00000151963	-2.64909	0.00154597	0.0123181	9.98755	5.15713	63.0386	65.2611	42.6679	12.9358	0	5.5177	ZNF37CP
ENSG00000152049	-1.71906	6.70306e-15	1.05928e-12	110.771	139.243	417.631	343.423	423.881	162.286	105.14	521.422	KCNE4
ENSG00000152056	-1.56009	3.32631e-10	1.89459e-08	32.6865	27.9959	90.1803	105.916	113.315	39.9835	33.7485	81.386	AP1S3
ENSG00000152078	-2.23339	2.06868e-12	1.95e-10	61.7412	55.255	216.258	251.416	261.603	28.2236	38.9406	143.46	TMEM56
ENSG00000152137	-2.9426	3.73116e-25	2.2275e-22	69.0049	94.3019	453.528	734.99	763.825	85.8469	124.61	913.179	HSPB8
ENSG00000152192	-4.7611	1.13163e-10	7.15325e-09	0.907959	2.94693	26.2661	35.3052	35.6732	0	1.29802	59.3152	POU4F1
ENSG00000152208	-1.08569	0.00917347	0.0495255	176.144	139.979	474.541	312.397	244.816	144.646	81.7753	120.01	GRID2
ENSG00000152377	1.37542	6.65199e-06	0.000127718	9779.63	10206.7	2157.32	2324.79	3877.88	5769.38	6469.34	4062.4	SPOCK1
ENSG00000152454	-3.06728	2.09874e-21	6.904e-19	8.17163	12.5245	81.4249	96.2868	83.2374	12.9358	6.4901	81.386	ZNF256
ENSG00000152463	-4.0508	2.48366e-07	7.16175e-06	1.81592	1.47347	27.1416	33.1655	25.8805	2.35197	0	9.65597	OLAH
ENSG00000152503	-2.30579	6.68987e-08	2.27498e-06	47.2139	58.9387	243.399	369.1	249.712	34.1036	50.6228	82.7655	TRIM36
ENSG00000152580	2.02339	0.000174107	0.00201178	32.6865	30.2061	7.00429	9.62868	5.59579	18.8158	15.5762	1.37942	IGSF10
ENSG00000152642	-1.73355	1.03389e-16	2.13658e-14	110.771	101.669	273.167	397.986	381.213	90.5509	97.3516	280.023	GPD1L
ENSG00000152779	-1.73459	6.7097e-06	0.000128436	28.1467	25.0489	68.2919	83.4486	100.724	21.1677	12.9802	40.0033	SLC16A12
ENSG00000152931	-1.81757	0.000382497	0.00394782	9.07959	3.68367	61.2876	36.375	41.9684	17.6398	22.0664	38.6239	PART1
ENSG00000153132	-1.20633	0.000645777	0.00607309	1097.72	941.545	1960.33	2444.62	2153.68	656.2	538.679	906.282	CLGN
ENSG00000153208	-2.65251	0.000272879	0.00296998	13.6194	0	34.1459	64.1912	30.0774	11.7599	5.19208	62.0741	MERTK
ENSG00000153233	-1.40279	0.00291449	0.0205416	60.8333	111.247	195.245	204.342	216.137	41.1595	41.5367	60.6947	PTPRR
ENSG00000153234	1.8784	1.32679e-08	5.37351e-07	248.781	258.593	119.073	39.5846	62.2532	232.845	299.843	60.6947	NR4A2
ENSG00000153237	-2.1603	5.30652e-13	5.81876e-11	17.2512	19.1551	65.6653	83.4486	92.3306	21.1677	11.6822	70.3506	CCDC148
ENSG00000153246	1.44157	7.14586e-07	1.78857e-05	904.327	990.169	409.751	314.537	275.593	636.208	668.481	176.566	PLA2R1
ENSG00000153253	1.1183	0.00703773	0.0402559	630.124	430.989	384.361	111.265	195.153	548.009	263.498	171.049	SCN3A
ENSG00000153404	-1.27153	0.000419145	0.0042842	16.3433	15.4714	45.5279	38.5147	52.4605	32.9276	20.7683	67.5918	PLEKHG4B
ENSG00000153406	1.17131	0.000875376	0.0077678	289.639	271.855	173.356	156.199	104.921	483.33	529.592	266.229	NMRAL1
ENSG00000153898	-1.66117	1.76541e-07	5.41002e-06	39.0422	21.3653	68.2919	101.636	90.2321	21.1677	22.0664	68.9712	MCOLN2
ENSG00000154127	-1.14823	2.62768e-10	1.54582e-08	1147.66	1266.44	2149.44	2369.73	2606.24	819.662	960.535	2178.11	UBASH3B
ENSG00000154134	1.12267	0.000800504	0.0072328	599.253	581.283	329.202	255.695	290.282	958.428	1039.71	586.255	ROBO3
ENSG00000154162	-5.1775	4.60885e-53	1.06129e-49	8.17163	19.1551	717.065	762.806	685.484	19.9918	25.9604	440.036	CDH12
ENSG00000154217	1.39308	3.55692e-13	4.03761e-11	747.25	951.859	385.236	338.074	307.769	739.695	1090.34	311.75	PITPNC1
ENSG00000154262	3.39581	9.00313e-08	2.93175e-06	41.7661	70.7264	4.37768	1.06985	2.09842	23.5197	45.4307	11.0354	ABCA6
ENSG00000154274	-2.28272	1.81684e-06	4.08447e-05	22.699	5.89387	47.279	78.0993	81.139	21.1677	6.4901	66.2124	C4orf19
ENSG00000154319	1.24711	4.5539e-15	7.49024e-13	1608	1757.11	716.189	803.46	762.427	1775.74	2281.92	845.587	FAM167A
ENSG00000154330	-4.24787	9.89061e-09	4.07741e-07	1.81592	0	112.944	157.269	131.501	17.6398	7.78812	93.8008	PGM5
ENSG00000154529	1.84493	3.70183e-10	2.05051e-08	295.087	327.846	60.412	60.9817	83.2374	281.06	325.803	140.701	CNTNAP3B
ENSG00000154734	-1.4764	2.37509e-05	0.00037905	1949.39	1695.96	2476.02	3443.86	5957.42	1869.82	1548.54	7779.95	ADAMTS1
ENSG00000154760	-1.82285	3.22234e-14	4.55622e-12	67.189	69.2529	181.236	234.298	296.577	85.8469	58.4109	281.403	SLFN13
ENSG00000154864	4.09859	3.19459e-16	6.24562e-14	71.7288	123.771	6.12876	2.13971	3.49737	52.9193	101.246	9.65597	PIEZO2
ENSG00000154898	1.77257	5.37163e-05	0.000760855	68.0969	81.7774	10.5064	11.7684	24.4816	37.6315	37.6426	19.3119	CCDC144CP
ENSG00000154928	-2.07021	2.27966e-16	4.59324e-14	30.8706	53.0448	183.863	209.691	200.749	41.1595	66.1991	204.155	EPHB1
ENSG00000154930	1.39279	0.00731941	0.0415721	12.7114	15.4714	9.6309	5.34927	4.89632	21.1677	31.1525	11.0354	ACSS1
ENSG00000155093	-1.46505	3.95312e-05	0.000588369	119.851	86.9345	580.481	323.096	242.717	189.334	122.014	280.023	PTPRN2
ENSG00000155511	1.37762	2.06473e-06	4.54664e-05	91.7039	58.9387	31.5193	33.1655	20.9842	65.8552	72.6892	26.2091	GRIA1
ENSG00000155622	-4.82827	1.40659e-07	4.42827e-06	2.72388	0	11.382	34.2353	33.5747	1.17599	0	33.1062	XAGE2
ENSG00000155629	-1.69123	0.00702863	0.0402324	1.81592	3.68367	35.0215	22.4669	15.3884	11.7599	11.6822	16.5531	PIK3AP1
ENSG00000155926	2.12252	0.000498514	0.00493887	16.3433	17.6816	9.6309	6.41912	1.39895	23.5197	31.1525	2.75885	SLA
ENSG00000155961	-5.33281	5.69318e-14	7.522e-12	1.81592	1.47347	58.661	83.4486	61.5537	1.17599	1.29802	31.7268	RAB39B
ENSG00000155974	-1.05676	1.43052e-06	3.30352e-05	42.6741	47.8877	106.815	113.405	95.1284	56.4473	46.7287	85.5243	GRIP1
ENSG00000156006	-4.07615	1.0195e-12	1.04009e-10	4.5398	3.68367	66.5408	130.522	74.1442	3.52796	6.4901	30.3473	NAT2
ENSG00000156140	-1.54885	1.28379e-08	5.21246e-07	153.445	155.451	309.94	412.964	393.104	88.1989	85.6694	304.853	ADAMTS3
ENSG00000156298	-1.9235	6.27204e-05	0.000864833	4.5398	5.89387	21.8884	28.8861	19.5853	5.87993	6.4901	15.1737	TSPAN7
ENSG00000156475	-2.84101	0.00748508	0.0423638	0	0	11.382	12.8382	34.9737	9.40788	7.78812	59.3152	PPP2R2B
ENSG00000156510	-1.24821	0.00241692	0.0176282	12.7114	7.36733	23.6395	25.6765	33.5747	17.6398	15.5762	41.3827	HKDC1
ENSG00000156675	-1.08165	6.62005e-07	1.67517e-05	76.2686	85.4611	173.356	180.805	166.475	59.9753	83.0733	124.148	RAB11FIP1
ENSG00000157111	1.56247	9.15985e-06	0.000167591	82.6243	106.09	52.5322	35.3052	32.1758	118.775	201.193	52.4181	TMEM171
ENSG00000157150	-2.14497	0.0010508	0.00901431	4.5398	1.47347	28.0172	19.2574	25.8805	9.40788	3.89406	8.27655	TIMP4
ENSG00000157168	-1.83844	1.51518e-11	1.17987e-09	543.868	487.717	1944.57	2397.54	1787.16	589.169	393.3	1073.19	NRG1
ENSG00000157214	1.21351	0.00244568	0.0178057	2446.04	3277.73	1244.14	962.868	944.29	1047.8	1644.59	477.281	STEAP2
ENSG00000157259	1.11612	5.03064e-09	2.23385e-07	1371.93	1407.9	619.88	495.342	566.574	1027.81	955.343	515.905	GATAD1
ENSG00000157399	-1.18967	7.49172e-07	1.86357e-05	99.8755	101.669	198.747	234.298	232.225	118.775	127.206	355.891	ARSE
ENSG00000157423	-1.23661	3.62854e-05	0.000547132	29.9627	21.3653	70.0429	78.0993	81.139	39.9835	29.8545	51.0387	HYDIN
ENSG00000157470	-1.28002	0.00729745	0.041479	10.8955	8.8408	23.6395	42.7942	23.7821	8.2319	15.5762	13.7942	FAM81A
ENSG00000157551	3.36101	1.11442e-06	2.66914e-05	3930.56	3888.48	863.279	313.467	158.081	3106.95	3123.04	31.7268	KCNJ15
ENSG00000157601	-4.13609	2.68281e-22	9.40093e-20	30.8706	36.0999	945.58	1222.84	800.198	51.7434	70.0931	325.544	MX1
ENSG00000157741	1.34288	3.8611e-06	7.96889e-05	813.531	852.4	319.571	223.599	272.795	489.21	433.539	204.155	UBN2
ENSG00000157873	2.46814	1.0864e-10	6.97676e-09	154.353	133.349	47.279	40.6544	32.1758	353.972	310.227	52.4181	TNFRSF14
ENSG00000157999	1.81003	0.00586242	0.0352598	19.9751	22.8387	0	6.41912	6.29526	23.5197	18.1723	12.4148	ANKRD61
ENSG00000158089	-6.76014	5.2842e-20	1.46855e-17	2.72388	0	143.588	176.526	138.496	0	2.59604	78.6272	GALNT14
ENSG00000158164	-1.03041	0.000193883	0.00221175	266.94	231.334	442.146	475.015	460.953	134.062	181.723	286.92	TMSB15A
ENSG00000158270	1.49236	0.00378909	0.0250621	41.7661	73.6733	27.1416	14.978	7.69421	47.0394	89.5634	41.3827	COLEC12
ENSG00000158286	1.5352	5.70104e-07	1.47504e-05	276.928	265.224	79.6738	73.8199	97.2269	342.212	346.572	176.566	RNF207
ENSG00000158296	1.2766	1.21252e-05	0.00021269	199.751	158.398	112.069	82.3787	52.4605	179.926	189.511	52.4181	SLC13A3
ENSG00000158373	-1.29678	0.000108819	0.00136608	20.8831	19.8918	48.1545	78.0993	45.4658	19.9918	25.9604	40.0033	HIST1H2BD
ENSG00000158406	-2.39335	3.82246e-06	7.90795e-05	6.35571	2.94693	28.0172	46.0037	30.0774	11.7599	3.89406	23.4502	HIST1H4H
ENSG00000158560	-1.85288	0.000164932	0.00191814	2.72388	10.3143	21.0129	23.5368	30.7769	4.70394	10.3842	26.2091	DYNC1I1
ENSG00000158747	1.6215	1.81163e-05	0.000298228	770.857	887.764	367.725	302.769	269.997	1298.29	1905.49	641.432	NBL1
ENSG00000158769	-3.87488	2.03512e-08	7.84789e-07	3.63184	0.736733	48.1545	101.636	56.6574	9.40788	2.59604	23.4502	F11R
ENSG00000158966	-1.49058	4.76905e-11	3.27116e-09	154.353	176.079	393.992	478.225	425.28	99.9588	147.974	332.441	CACHD1
ENSG00000159403	1.55184	3.32035e-07	9.27568e-06	1838.62	2090.85	1221.37	863.372	633.723	2460.16	3191.83	547.631	C1R
ENSG00000159674	1.59705	0.000485968	0.00485637	830.783	627.697	410.627	233.228	260.904	1799.26	1670.55	725.577	SPON2
ENSG00000159784	-1.23555	1.02004e-05	0.000183505	25.4229	40.5203	74.4206	74.8898	80.4395	24.6957	45.4307	91.042	FAM131B
ENSG00000160145	-2.29851	5.79342e-11	3.87486e-09	22.699	17.6816	149.717	185.085	154.584	49.3914	35.0466	113.113	KALRN
ENSG00000160207	-1.67509	0.00475579	0.029898	9.98755	1.47347	14.0086	19.2574	13.9895	4.70394	5.19208	20.6914	HSF2BP
ENSG00000160766	1.15252	0.000115865	0.00144106	176.144	164.292	69.1674	52.4228	74.8437	199.918	188.213	133.804	GBAP1
ENSG00000160838	1.68938	0.000631492	0.0059631	24.5149	30.9428	7.87983	6.41912	7.69421	48.2154	37.6426	23.4502	LRRC71
ENSG00000160999	2.04227	0.00728108	0.0414273	10.8955	19.8918	3.50215	4.27942	4.89632	56.4473	57.1129	23.4502	SH2B2
ENSG00000161267	-1.35085	0.000242238	0.00268729	29.9627	33.8897	78.7983	103.776	119.61	30.5756	76.5832	129.666	BDH1
ENSG00000161395	1.48728	2.48831e-08	9.39323e-07	167.064	232.808	98.9356	82.3787	51.7611	261.069	236.24	88.2831	PGAP3
ENSG00000161912	1.14134	5.86863e-07	1.50631e-05	233.346	186.394	111.193	64.1912	94.429	185.806	175.233	82.7655	ADCY10P1
ENSG00000162144	1.55136	3.72786e-06	7.75346e-05	910.683	1035.11	470.163	324.166	370.721	1736.93	1793.86	704.886	CYB561A3
ENSG00000162433	-2.81263	3.216e-16	6.24562e-14	64.4651	83.2509	357.219	525.298	409.192	31.7516	41.5367	277.264	AK4
ENSG00000162493	-3.14989	3.47878e-10	1.96065e-08	3.63184	2.94693	61.2876	47.0736	44.7663	7.05591	7.78812	26.2091	PDPN
ENSG00000162496	1.81478	6.27149e-06	0.000121649	122.574	181.973	42.0258	36.375	58.0563	216.381	308.929	100.698	DHRS3
ENSG00000162591	2.07332	0.00598611	0.0358966	589.266	719.788	58.661	104.846	181.164	1646.38	2274.13	899.385	MEGF6
ENSG00000162595	1.69576	7.06381e-10	3.70884e-08	105.323	99.459	40.2747	24.6066	34.2742	85.8469	101.246	19.3119	DIRAS3
ENSG00000162630	2.7095	9.21582e-05	0.00119221	92.6118	20.6285	14.0086	5.34927	8.39369	74.0871	16.8743	2.75885	B3GALT2
ENSG00000162631	-2.52949	6.06223e-08	2.07467e-06	155.261	41.9938	644.395	660.1	709.966	194.038	50.6228	533.837	NTNG1
ENSG00000162643	-1.80158	0.000143565	0.00171416	19.9751	9.57753	36.7725	39.5846	40.5695	7.05591	3.89406	27.5885	WDR63
ENSG00000162722	-1.0518	1.08097e-06	2.59675e-05	700.944	796.409	1027.88	1671.11	1575.91	566.825	777.514	1619.44	TRIM58
ENSG00000162817	1.32541	4.71914e-05	0.000682835	197.935	111.983	87.5537	57.7721	65.7505	224.613	119.418	48.2798	C1orf115
ENSG00000162849	2.33334	1.45328e-13	1.7882e-11	325.049	393.416	124.326	65.2611	49.6626	369.259	520.506	80.0066	KIF26B
ENSG00000162878	-1.92577	0.000101505	0.00128629	8.17163	8.10407	21.8884	27.8162	37.7716	5.87993	16.8743	59.3152	PKDCC
ENSG00000162892	2.04839	1.55028e-06	3.54454e-05	2265.36	3137.01	949.957	778.854	418.985	1501.73	2999.73	245.538	IL24
ENSG00000162894	1.59728	5.03735e-05	0.000722394	68.0969	64.8325	43.7768	25.6765	26.58	108.191	167.445	38.6239	FCMR
ENSG00000162944	1.64473	1.81952e-06	4.08479e-05	45.398	52.3081	14.8841	9.62868	13.9895	43.5115	32.4505	17.9325	RFTN2
ENSG00000163053	-2.88736	1.39462e-06	3.24385e-05	2.72388	2.94693	21.8884	25.6765	32.1758	8.2319	0	22.0708	SLC16A14
ENSG00000163064	1.2542	0.00460994	0.0292319	69.0049	58.9387	48.1545	38.5147	41.9684	176.398	176.531	73.1095	EN1
ENSG00000163235	-1.61805	0.000520779	0.00511856	27.2388	43.4673	118.197	129.452	99.3253	12.9358	42.8347	41.3827	TGFA
ENSG00000163293	-1.80922	1.84887e-14	2.78522e-12	73.5447	76.6203	197.871	300.629	264.401	58.7993	62.305	191.74	NIPAL1
ENSG00000163347	-1.85351	1.33401e-05	0.000232213	292.363	247.542	910.558	1292.38	932.399	223.437	176.531	262.091	CLDN1
ENSG00000163376	-2.64026	1.91893e-11	1.45902e-09	82.6243	55.255	308.189	397.986	414.089	29.3996	38.9406	172.428	KBTBD8
ENSG00000163412	-1.76299	0.000212851	0.0024043	31.7786	46.4142	121.7	141.221	153.185	14.1118	42.8347	42.7621	EIF4E3
ENSG00000163431	1.14824	2.01072e-11	1.50748e-09	1612.54	1639.23	932.447	729.64	735.847	1709.88	1652.38	582.117	LMOD1
ENSG00000163435	1.83445	0.00797884	0.0446101	22.699	5.89387	4.37768	2.13971	6.29526	35.2796	24.6624	12.4148	ELF3
ENSG00000163462	1.59511	0.00013003	0.0015891	118.035	137.032	59.5365	44.9339	60.8542	281.06	302.439	113.113	TRIM46
ENSG00000163531	-4.08793	5.10089e-20	1.44248e-17	49.0298	109.773	1343.95	1406.86	1621.38	55.2713	196.001	2583.66	NFASC
ENSG00000163534	-6.68687	3.68966e-08	1.33349e-06	0	0	34.1459	12.8382	18.8858	0	0	9.65597	FCRL1
ENSG00000163536	-1.24366	0.00277159	0.0197147	80.8084	59.6754	112.944	127.313	144.092	27.0477	25.9604	77.2478	SERPINI1
ENSG00000163590	-1.18993	0.000588103	0.00563593	36.3184	43.4673	70.9185	69.5405	85.3358	15.2878	27.2584	56.5564	PPM1L
ENSG00000163623	-3.69327	3.19384e-05	0.000493119	0	1.47347	7.87983	22.4669	18.8858	4.70394	0	28.9679	NKX6-1
ENSG00000163624	-2.10177	4.07047e-07	1.10458e-05	13.6194	26.5224	63.0386	97.3567	95.1284	16.4638	11.6822	41.3827	CDS1
ENSG00000163638	-3.30561	5.61206e-12	4.81175e-10	3.63184	4.4204	62.1631	87.728	65.0511	4.70394	15.5762	49.6593	ADAMTS9
ENSG00000163660	1.01584	0.000352662	0.00370089	4874.83	4689.31	1379.85	1677.53	2373.31	2845.88	2641.47	2013.96	CCNL1
ENSG00000163710	-1.96755	6.47934e-32	5.80225e-29	89.888	105.353	409.751	418.313	425.28	97.6068	118.12	346.235	PCOLCE2
ENSG00000163734	1.0462	0.000166011	0.00192743	307.798	450.881	139.21	226.809	165.076	234.021	424.453	155.875	CXCL3
ENSG00000163823	-4.04959	6.10931e-07	1.56063e-05	0.907959	0	27.1416	39.5846	25.8805	2.35197	3.89406	11.0354	CCR1
ENSG00000163833	-2.70073	0.000246399	0.00272221	0.907959	0.736733	26.2661	27.8162	19.5853	7.05591	5.19208	9.65597	FBXO40
ENSG00000163947	-2.59794	1.21306e-11	9.5382e-10	6.35571	12.5245	66.5408	88.7979	97.9263	12.9358	22.0664	63.4535	ARHGEF3
ENSG00000164045	-1.00467	1.89097e-13	2.27466e-11	372.263	373.524	625.133	764.946	705.769	355.148	321.909	766.96	CDC25A
ENSG00000164114	-1.30478	0.000664129	0.00621926	712.748	878.923	1322.06	1856.2	1738.19	352.796	369.936	805.584	MAP9
ENSG00000164181	-4.2615	6.90476e-14	8.97564e-12	15.4353	5.89387	218.884	359.471	242.018	14.1118	10.3842	51.0387	ELOVL7
ENSG00000164199	-1.66535	1.5598e-08	6.16238e-07	28.1467	22.8387	58.661	98.4266	76.9421	21.1677	22.0664	66.2124	ADGRV1
ENSG00000164220	-1.13999	1.11175e-08	4.55989e-07	1558.06	1327.59	2362.2	2745.25	3280.53	1285.35	952.747	2909.21	F2RL2
ENSG00000164283	-1.38797	1.86778e-07	5.63796e-06	1904.9	1954.55	2963.69	4000.18	5402.04	1104.25	1391.48	4272.08	ESM1
ENSG00000164318	-1.11356	4.9676e-07	1.31699e-05	39.0422	57.4652	105.064	113.405	125.905	57.6233	54.5169	104.836	EGFLAM
ENSG00000164418	1.54215	4.08479e-10	2.23955e-08	1189.43	1049.11	388.738	342.353	296.577	811.43	667.183	248.296	GRIK2
ENSG00000164509	-2.84306	0.000608926	0.00578731	9.07959	0.736733	114.695	75.9596	104.222	35.2796	2.59604	42.7621	IL31RA
ENSG00000164520	-1.63655	4.0986e-07	1.11034e-05	39.0422	29.4693	73.5451	93.0773	90.9316	19.9918	15.5762	71.7301	RAET1E
ENSG00000164591	1.12875	0.00752108	0.0424929	18.1592	19.1551	7.87983	13.9081	6.99474	23.5197	22.0664	9.65597	MYOZ3
ENSG00000164647	1.06374	0.000563067	0.00545437	1836.8	2452.58	1121.56	951.1	798.1	1136	1690.02	532.458	STEAP1
ENSG00000164683	-1.24363	0.000153356	0.0018083	23.6069	22.8387	35.897	43.864	61.5537	22.3437	15.5762	60.6947	HEY1
ENSG00000164687	-1.07756	2.94898e-06	6.25456e-05	177.96	193.024	271.416	395.846	444.166	210.501	189.511	517.284	FABP5
ENSG00000164692	1.13994	7.69013e-06	0.000143411	129548	131068	97895.5	53062.6	48692.5	147293	152868	54815.6	COL1A2
ENSG00000164707	2.37048	4.63673e-05	0.000672118	70.8208	78.8305	8.75537	6.41912	4.89632	65.8552	68.7951	37.2445	SLC13A4
ENSG00000164761	1.01964	0.00211955	0.015931	1684.26	1779.21	1008.62	963.938	637.221	1211.26	1351.24	361.409	TNFRSF11B
ENSG00000164796	-4.5481	8.20503e-07	2.02848e-05	7.26367	0	277.545	277.092	167.874	21.1677	3.89406	22.0708	CSMD3
ENSG00000164867	1.61951	0.00754807	0.0426006	19.9751	13.2612	5.25322	6.41912	4.89632	45.8634	23.3644	17.9325	NOS3
ENSG00000164877	1.4184	0.00620363	0.0368446	537.512	474.456	185.614	220.39	232.225	1310.05	1300.62	718.68	MICALL2
ENSG00000164896	1.23022	0.00729877	0.041479	774.489	702.843	449.15	364.82	365.125	1820.43	1860.06	1020.77	FASTK
ENSG00000164949	-1.04477	2.57623e-14	3.7411e-12	465.783	442.777	872.035	1101.95	1028.23	493.914	489.354	895.246	GEM
ENSG00000165029	1.54086	0.00155005	0.0123323	1527.19	1581.77	621.631	579.861	427.379	999.588	915.105	96.5597	ABCA1
ENSG00000165092	-1.04046	0.00263152	0.018869	310.522	461.932	561.219	715.732	792.504	143.47	420.559	681.436	ALDH1A1
ENSG00000165124	-1.10833	0.000263297	0.00287735	203.383	177.553	260.034	316.677	481.937	226.965	120.716	514.525	SVEP1
ENSG00000165194	-4.95177	9.17307e-05	0.00118775	0.907959	2.94693	573.477	86.6582	57.3569	8.2319	11.6822	6.89712	PCDH19
ENSG00000165300	1.6359	1.11185e-10	7.05587e-09	268.756	228.387	91.0558	85.5883	72.7453	370.435	196.001	93.8008	SLITRK5
ENSG00000165323	-1.63709	8.08213e-12	6.57959e-10	104.415	100.932	273.167	293.14	303.572	91.7269	54.5169	230.364	FAT3
ENSG00000165899	-3.49908	5.20608e-10	2.80658e-08	19.9751	7.36733	214.506	239.647	196.552	21.1677	12.9802	38.6239	OTOGL
ENSG00000165949	-2.54644	2.41219e-11	1.75144e-09	19.0671	13.2612	112.069	140.151	95.1284	21.1677	15.5762	52.4181	IFI27
ENSG00000165953	-2.19277	8.70748e-06	0.000160407	7.26367	5.15713	22.764	17.1177	30.7769	7.05591	5.19208	42.7621	SERPINA12
ENSG00000166033	1.119	7.71991e-09	3.24902e-07	8472.17	7691.49	5078.11	4752.29	3899.57	10496.8	11034.5	3622.37	HTRA1
ENSG00000166086	1.25555	0.00174832	0.0136009	81.7163	140.716	28.8927	31.0258	53.8595	50.5674	125.908	53.7975	JAM3
ENSG00000166104	-4.13971	5.21844e-11	3.5195e-09	4.5398	8.8408	91.9314	114.474	256.707	24.6957	16.8743	491.075	AC126323.1
ENSG00000166292	-2.19157	0.000101113	0.00128233	2.72388	5.89387	24.515	26.7463	25.8805	8.2319	2.59604	11.0354	TMEM100
ENSG00000166317	-2.3634	5.42794e-05	0.000767482	5.44776	1.47347	40.2747	19.2574	29.3779	11.7599	9.08614	48.2798	SYNPO2L
ENSG00000166340	1.17097	6.78661e-10	3.59847e-08	5139.96	4937.59	2982.95	2376.15	2042.46	5130.82	5467.26	1778.08	TPP1
ENSG00000166396	-1.04146	0.00332653	0.0226724	6121.46	3584.94	10006.5	10171.1	9030.91	4311.16	2370.19	4523.13	SERPINB7
ENSG00000166402	-1.63359	0.00045121	0.00456851	90.7959	208.496	281.923	358.401	461.653	35.2796	159.657	434.519	TUB
ENSG00000166436	1.10256	0.000432594	0.00440103	147.997	159.871	56.0343	43.864	72.7453	175.222	128.504	114.492	TRIM66
ENSG00000166592	1.97072	1.24071e-06	2.92812e-05	165.249	156.924	82.3004	86.6582	63.6521	470.394	423.155	77.2478	RRAD
ENSG00000166689	-3.06843	7.10116e-06	0.000134981	19.0671	1.47347	61.2876	67.4008	102.823	24.6957	9.08614	220.708	PLEKHA7
ENSG00000166793	2.35037	1.45011e-08	5.81152e-07	72.6367	50.0979	16.6352	12.8382	5.59579	84.6709	75.2852	22.0708	YPEL4
ENSG00000166897	-1.09363	0.000694712	0.00645794	259.676	243.122	722.318	686.846	598.05	555.065	381.618	1062.16	ELFN2
ENSG00000166997	1.19208	1.35861e-08	5.48856e-07	792.648	735.996	461.408	295.28	269.297	705.591	826.839	313.129	CNPY4
ENSG00000167034	-1.35367	3.51883e-06	7.37581e-05	150.721	200.391	378.232	571.302	432.974	127.006	158.359	245.538	NKX3-1
ENSG00000167083	-3.65166	1.52849e-13	1.86649e-11	8.17163	8.10407	133.957	195.783	143.392	24.6957	3.89406	84.1449	GNGT2
ENSG00000167100	1.39184	0.00161006	0.0127218	39.0422	50.0979	25.3906	28.8861	18.1863	105.839	105.14	42.7621	SAMD14
ENSG00000167191	1.16475	0.00235987	0.0173255	27.2388	25.7857	14.0086	11.7684	13.9895	47.0394	37.6426	22.0708	GPRC5B
ENSG00000167371	1.88306	0.000797452	0.00720927	188.856	255.646	55.1588	31.0258	80.4395	443.346	510.122	213.811	PRRT2
ENSG00000167617	2.89103	0.000129169	0.00158453	46.3059	34.6265	28.8927	8.55883	2.7979	197.566	201.193	24.8296	CDC42EP5
ENSG00000167995	-1.51603	5.12689e-08	1.77497e-06	29.0547	31.6795	98.9356	118.754	118.911	58.7993	44.1327	125.528	BEST1
ENSG00000168010	1.14686	0.00142116	0.0115288	1244.81	1166.99	426.386	422.592	595.252	1679.31	1704.3	1175.27	ATG16L2
ENSG00000168032	-6.08659	6.09939e-09	2.62877e-07	0	1.47347	28.8927	32.0956	42.6679	0	0	28.9679	ENTPD3
ENSG00000168243	1.04282	0.00257005	0.0185189	109.863	80.3039	61.2876	32.0956	50.3621	159.934	73.9872	62.0741	GNG4
ENSG00000168255	1.33194	3.02993e-07	8.55331e-06	482.126	529.711	273.167	149.78	186.76	659.728	610.07	297.956	POLR2J3
ENSG00000168280	-4.41448	1.66398e-33	1.67636e-30	44.49	46.4142	877.288	1078.41	928.901	21.1677	41.5367	408.31	KIF5C
ENSG00000168356	-2.66596	1.67251e-23	6.57542e-21	39.9502	32.4163	248.652	195.783	197.252	31.7516	20.7683	158.634	SCN11A
ENSG00000168398	1.70265	3.11137e-12	2.81898e-10	677.338	610.752	254.781	240.717	179.765	792.614	563.341	135.184	BDKRB2
ENSG00000168453	2.59069	1.62512e-06	3.69467e-05	198.843	154.714	105.064	50.2831	33.5747	774.974	416.665	67.5918	HR
ENSG00000168542	1.61873	5.17413e-07	1.36055e-05	65505.6	56607.6	35278.9	17926.5	15208.7	70436.8	57691.8	13068.7	COL3A1
ENSG00000168671	-3.51514	6.82479e-07	1.72158e-05	2.72388	1.47347	35.0215	34.2353	48.2637	4.70394	2.59604	8.27655	UGT3A2
ENSG00000168685	-1.01552	0.000255636	0.00280694	1249.35	1057.21	1862.27	2223.16	2166.97	792.614	633.434	1296.66	IL7R
ENSG00000168702	-2.16524	1.97966e-05	0.000321674	23.6069	6.6306	91.9314	89.8677	79.0405	16.4638	18.1723	26.2091	LRP1B
ENSG00000168916	1.47247	1.73941e-05	0.000289345	88.072	67.7795	31.5193	29.9559	20.9842	103.487	44.1327	27.5885	ZNF608
ENSG00000168952	-1.42667	1.1746e-09	5.80777e-08	214.278	128.928	401.871	371.239	482.637	174.046	120.716	460.728	STXBP6
ENSG00000169031	-1.66863	7.46441e-07	1.85964e-05	21.791	13.2612	56.9099	55.6324	52.4605	15.2878	12.9802	35.865	COL4A3
ENSG00000169071	-3.26147	1.67473e-05	0.000282079	2.72388	0.736733	20.1373	34.2353	19.5853	0	9.08614	38.6239	ROR2
ENSG00000169116	-1.47597	1.30704e-05	0.00022801	52.6616	75.8835	173.356	230.019	143.392	56.4473	42.8347	89.6626	PARM1
ENSG00000169231	1.47318	9.74094e-10	4.93755e-08	338.669	396.362	163.725	118.754	124.506	483.33	476.374	205.534	THBS3
ENSG00000169245	-3.96362	0.000280909	0.00304913	3.63184	1.47347	21.8884	36.375	25.8805	0	0	1.37942	CXCL10
ENSG00000169248	-3.04733	0.000195414	0.00222136	6.35571	1.47347	34.1459	22.4669	32.8753	3.52796	0	5.5177	CXCL11
ENSG00000169252	-1.39425	6.68142e-09	2.84915e-07	62.6492	88.408	194.369	224.669	205.645	109.367	86.9674	288.3	ADRB2
ENSG00000169255	-1.86023	1.83823e-08	7.20152e-07	170.696	156.187	413.253	604.467	624.63	99.9588	99.9476	274.505	B3GALNT1
ENSG00000169271	2.20607	0.00282609	0.0199973	14.5273	16.2081	9.6309	2.13971	0.699474	17.6398	16.8743	1.37942	HSPB3
ENSG00000169306	-2.46091	2.91363e-05	0.000454205	2.72388	5.89387	56.0343	58.842	47.5642	10.5839	14.2782	15.1737	IL1RAPL1
ENSG00000169508	1.44149	0.000370651	0.00384956	112.587	139.243	48.1545	35.3052	32.1758	52.9193	66.1991	20.6914	GPR183
ENSG00000169570	-1.16104	7.65799e-05	0.00101847	115.311	108.3	195.245	262.114	261.603	79.967	75.2852	129.666	DTWD2
ENSG00000169583	1.72775	0.00642154	0.0377531	13.6194	11.051	9.6309	9.62868	11.1916	58.7993	59.709	12.4148	CLIC3
ENSG00000169594	-1.43112	3.31344e-05	0.000507693	30.8706	27.2591	111.193	100.566	87.4342	37.6315	32.4505	42.7621	BNC1
ENSG00000169860	-1.9334	3.32955e-09	1.5118e-07	14.5273	32.4163	67.4163	85.5883	107.02	23.5197	19.4703	86.9037	P2RY1
ENSG00000169871	1.13677	9.6931e-10	4.9288e-08	2965.39	2925.57	1554.08	1284.89	1311.51	3843.12	3485.19	1863.6	TRIM56
ENSG00000169919	1.03828	0.000939442	0.00822534	946.093	940.072	652.275	489.993	495.228	1628.74	1732.86	918.697	GUSB
ENSG00000169994	-1.66798	0.000242941	0.00269324	192.487	129.665	428.137	436.5	598.05	333.98	255.71	1433.22	MYO7B
ENSG00000170054	-1.34337	0.000161577	0.00188592	301.442	125.981	502.558	624.795	554.683	326.924	124.61	547.631	SERPINA9
ENSG00000170165	-6.72169	1.17404e-08	4.80312e-07	0	0	41.1502	42.7942	34.2742	1.17599	0	9.65597	CR848007.1
ENSG00000170166	1.44567	0.000573276	0.00552566	90.7959	67.7795	21.8884	20.3272	34.2742	138.766	68.7951	59.3152	HOXD4
ENSG00000170271	1.35398	0.000156952	0.00184396	156.169	150.294	108.567	68.4706	46.1653	192.862	159.657	33.1062	FAXDC2
ENSG00000170324	4.74632	4.97586e-06	9.92647e-05	48.1218	142.19	0	1.06985	2.7979	3.52796	115.524	8.27655	FRMPD2
ENSG00000170379	1.91031	7.01089e-08	2.36915e-06	40.8582	41.2571	14.0086	9.62868	7.69421	38.8075	36.3446	11.0354	TCAF2
ENSG00000170381	-3.1483	1.58133e-15	2.71165e-13	10.8955	8.10407	109.442	157.269	108.418	14.1118	18.1723	66.2124	SEMA3E
ENSG00000170425	-1.27396	3.07855e-06	6.49518e-05	62.6492	58.9387	210.129	170.107	188.858	98.7828	114.226	233.123	ADORA2B
ENSG00000170439	-1.99014	0.000377569	0.00390632	6.35571	5.89387	23.6395	11.7684	18.1863	5.87993	6.4901	45.521	METTL7B
ENSG00000170542	1.61404	1.05607e-08	4.34255e-07	62.6492	65.5693	26.2661	20.3272	20.9842	68.2071	57.1129	13.7942	SERPINB9
ENSG00000170689	-3.82783	4.88604e-07	1.2975e-05	0.907959	0.736733	19.2618	42.7942	23.7821	4.70394	1.29802	15.1737	HOXB9
ENSG00000170848	-1.24962	0.00737973	0.0418557	9.98755	22.102	22.764	36.375	48.2637	8.2319	14.2782	23.4502	PSG6
ENSG00000170989	-1.04641	7.71327e-12	6.31117e-10	700.037	698.423	1224	1690.37	1516.46	787.91	759.342	1652.55	S1PR1
ENSG00000171121	1.68625	0.00121415	0.0101246	23.6069	16.9449	5.25322	5.34927	4.19684	16.4638	10.3842	6.89712	KCNMB3
ENSG00000171246	4.26494	2.22257e-11	1.63587e-09	57.2014	78.0937	1.75107	0	2.09842	78.791	64.901	12.4148	NPTX1
ENSG00000171291	-2.02411	0.00287327	0.0202688	75.3606	3.68367	107.691	165.827	144.791	42.3355	12.9802	128.286	ZNF439
ENSG00000171310	-1.50082	6.75691e-09	2.86617e-07	161.617	259.33	512.189	497.482	680.588	174.046	272.584	765.58	CHST11
ENSG00000171316	-1.90261	2.82918e-06	6.03221e-05	18.1592	17.6816	124.326	148.71	127.304	45.8634	57.1129	108.975	CHD7
ENSG00000171408	2.52776	3.55995e-09	1.60287e-07	602.885	631.38	164.601	101.636	53.8595	430.411	408.877	38.6239	PDE7B
ENSG00000171533	-1.45751	0.000465374	0.00468835	16.3433	18.4183	34.1459	58.842	43.3674	5.87993	20.7683	33.1062	MAP6
ENSG00000171631	2.53105	0.000508025	0.00501768	22.699	21.3653	1.75107	5.34927	1.39895	39.9835	51.9208	16.5531	P2RY6
ENSG00000171649	-1.09588	3.21485e-08	1.18311e-06	154.353	193.761	330.077	416.173	357.431	143.47	153.166	277.264	ZIK1
ENSG00000171714	-3.21339	1.17679e-05	0.000207762	5.44776	0	26.2661	60.9817	28.6784	7.05591	2.59604	19.3119	ANO5
ENSG00000171724	-3.76904	1.33598e-12	1.32114e-10	19.9751	85.4611	909.683	784.203	581.263	16.4638	71.3911	365.547	VAT1L
ENSG00000171812	1.42067	0.00146269	0.0118122	31.7786	16.2081	10.5064	12.8382	14.689	45.8634	46.7287	13.7942	COL8A2
ENSG00000171872	1.02325	0.000506985	0.00501048	76.2686	74.4101	46.4034	24.6066	31.4763	67.0312	92.1595	51.0387	KLF17
ENSG00000172000	-2.1922	0.00502993	0.031292	2.72388	0	35.897	26.7463	23.0826	12.9358	7.78812	16.5531	ZNF556
ENSG00000172061	1.00702	2.99345e-05	0.00046485	3292.26	2633.82	2242.25	1698.93	1428.33	4208.85	3203.52	1264.93	LRRC15
ENSG00000172137	2.34971	1.03509e-07	3.35034e-06	707.3	1158.14	364.223	198.993	155.983	719.703	1523.88	85.5243	CALB2
ENSG00000172201	-3.05469	1.47748e-10	9.2308e-09	32.6865	18.4183	87.5537	136.941	271.396	27.0477	28.5565	388.998	ID4
ENSG00000172292	-1.15292	1.00808e-05	0.000181916	509.365	542.236	960.464	1008.87	1107.27	337.508	303.737	692.471	CERS6
ENSG00000172345	1.17748	8.00096e-06	0.000148409	87.1641	92.0917	53.4077	42.7942	30.0774	101.135	118.12	51.0387	STARD5
ENSG00000172348	-3.50344	3.0934e-20	9.40801e-18	18.1592	21.3653	198.747	274.952	251.111	7.05591	31.1525	153.116	RCAN2
ENSG00000172379	1.68158	1.44398e-06	3.32507e-05	333.221	371.314	194.369	83.4486	66.45	293.996	429.645	100.698	ARNT2
ENSG00000172403	1.77638	6.61602e-10	3.53124e-08	7029.42	5606.54	2141.56	1781.31	1494.08	5113.18	4078.38	953.182	SYNPO2
ENSG00000172803	1.04545	0.00319345	0.0219417	40.8582	48.6244	17.5107	11.7684	19.5853	35.2796	35.0466	30.3473	SNX32
ENSG00000173083	-1.50055	2.99074e-07	8.45748e-06	84.4402	60.4121	218.884	246.066	193.754	76.439	53.2188	117.251	HPSE
ENSG00000173114	1.92819	6.60549e-11	4.36368e-09	1352.86	1219.29	378.232	285.651	288.883	891.397	799.581	165.531	LRRN3
ENSG00000173209	1.54493	2.54648e-06	5.48753e-05	1939.4	1942.03	478.919	376.589	708.567	2022.69	1913.28	1117.33	AHSA2P
ENSG00000173432	-3.9037	5.84841e-07	1.50352e-05	13.6194	8.8408	486.798	946.821	550.486	89.3749	25.9604	66.2124	SAA1
ENSG00000173531	1.74797	6.10645e-05	0.000846345	87.1641	75.1468	24.515	18.1875	19.5853	148.174	90.8614	59.3152	MST1
ENSG00000173641	1.86403	1.02749e-06	2.48307e-05	87.1641	64.8325	29.7682	24.6066	21.6837	163.462	118.12	44.1416	HSPB7
ENSG00000173705	-1.76758	5.16955e-07	1.36055e-05	141.642	207.022	338.833	526.368	622.532	68.2071	176.531	536.596	SUSD5
ENSG00000173890	-1.5788	0.000139514	0.00167323	23.6069	15.4714	48.1545	111.265	107.02	37.6315	35.0466	62.0741	GPR160
ENSG00000173918	1.36507	3.45705e-05	0.000525699	1810.47	1774.79	1399.98	1153.3	828.177	3704.35	3634.46	858.002	C1QTNF1
ENSG00000173930	-6.72616	2.86285e-09	1.31846e-07	0	0	42.9013	32.0956	37.7716	1.17599	0	15.1737	SLCO4C1
ENSG00000174059	-1.17501	1.48172e-07	4.63764e-06	59.0173	44.204	100.687	127.313	114.014	54.0953	40.2386	104.836	CD34
ENSG00000174353	1.20921	0.000315309	0.00336587	113.495	120.088	60.412	33.1655	36.3726	143.47	122.014	88.2831	STAG3L3
ENSG00000174473	-1.04539	0.00348641	0.0234715	44.49	27.9959	58.661	72.7501	75.5432	57.6233	28.5565	121.389	GALNTL6
ENSG00000174564	-1.28977	0.00132513	0.0108812	103.507	48.6244	213.631	277.092	204.946	128.182	51.9208	114.492	IL20RB
ENSG00000174586	1.08397	0.00408696	0.0264569	32.6865	37.5734	27.1416	10.6985	16.7874	51.7434	49.3248	26.2091	ZNF497
ENSG00000174607	-1.36963	3.26275e-05	0.000501834	228.806	169.449	402.747	500.692	432.974	108.191	106.438	251.055	UGT8
ENSG00000174640	-1.49531	0.000153603	0.00180857	13.6194	11.051	63.9142	41.7243	45.4658	29.3996	24.6624	66.2124	SLCO2A1
ENSG00000174749	-1.37275	9.12697e-07	2.23244e-05	288.731	265.961	560.343	804.53	642.816	168.166	205.087	398.654	FAM241A
ENSG00000174807	1.80998	0.000122503	0.00151429	1704.24	1658.39	849.271	683.637	598.75	4795.67	5033.72	1631.86	CD248
ENSG00000174939	1.02245	0.00690107	0.0397706	94.4278	82.5141	47.279	57.7721	69.2479	136.414	223.26	89.6626	ASPHD1
ENSG00000175003	-1.0624	5.92326e-05	0.000825926	80.8084	59.6754	182.112	198.993	148.288	116.423	68.7951	147.598	SLC22A1
ENSG00000175264	-1.7078	3.26901e-05	0.000502319	11.8035	16.2081	48.1545	67.4008	62.2532	18.8158	37.6426	93.8008	CHST1
ENSG00000175274	2.07309	0.000167326	0.00194038	128.93	44.204	40.2747	28.8861	28.6784	337.508	142.782	57.9358	TP53I11
ENSG00000175697	-1.07709	0.00066865	0.00625293	26.3308	21.3653	38.5236	74.8898	55.2584	31.7516	28.5565	57.9358	GPR156
ENSG00000175746	-1.93829	0.00112134	0.00948395	21.791	51.5713	140.961	166.897	112.615	16.4638	24.6624	20.6914	C15orf54
ENSG00000176165	2.15822	1.87474e-15	3.14781e-13	318.694	297.64	108.567	56.7023	49.6626	309.284	312.823	62.0741	FOXG1
ENSG00000176406	-2.43943	4.33231e-14	5.918e-12	45.398	25.0489	145.339	178.666	291.681	42.3355	33.7485	173.807	RIMS2
ENSG00000176532	2.94569	1.34863e-05	0.000234252	93.5198	126.718	9.6309	5.34927	17.4868	250.485	267.392	64.8329	PRR15
ENSG00000176593	1.02924	0.00835932	0.0462719	72.6367	50.8346	17.5107	19.2574	33.5747	70.5591	50.6228	51.0387	AC008969.1
ENSG00000176597	-1.68046	3.30712e-06	6.95012e-05	148.905	178.289	395.743	531.717	488.932	88.1989	90.8614	211.052	B3GNT5
ENSG00000176771	1.45961	1.75209e-09	8.33097e-08	456.703	432.462	168.103	113.405	158.081	310.46	314.121	108.975	NCKAP5
ENSG00000176907	2.19473	6.27116e-05	0.000864833	164.341	195.971	58.661	29.9559	25.8805	83.495	110.332	5.5177	TCIM
ENSG00000176971	1.66782	3.16608e-08	1.17051e-06	877.089	717.578	415.88	288.861	227.329	941.964	922.893	154.496	FIBIN
ENSG00000176988	4.56103	6.63406e-20	1.81245e-17	369.539	309.428	36.7725	8.55883	13.29	480.978	356.956	4.13827	FMR1NB
ENSG00000177173	-1.78253	0.000480643	0.004813	7.26367	5.89387	14.0086	33.1655	30.7769	9.40788	5.19208	16.5531	NAP1L4P1
ENSG00000177570	-1.30505	0.000977568	0.00849457	234.253	170.922	436.017	577.721	484.036	172.87	98.6496	175.187	SAMD12
ENSG00000177675	-1.45309	2.74028e-24	1.38033e-21	438.544	391.942	1280.91	1263.5	1291.93	535.073	460.797	1151.82	CD163L1
ENSG00000177692	1.16648	0.00855544	0.0470505	39.0422	44.204	14.8841	18.1875	13.9895	22.3437	18.1723	8.27655	DNAJC28
ENSG00000177699	-2.80555	0.00344569	0.0232682	0.907959	0	7.00429	26.7463	17.4868	9.40788	1.29802	26.2091	AC011944.1
ENSG00000177757	1.94348	0.000841549	0.00754026	19.9751	22.102	2.62661	2.13971	6.29526	15.2878	10.3842	6.89712	FAM87B
ENSG00000177842	-1.00605	0.000160109	0.00187286	39.0422	25.0489	61.2876	69.5405	68.5484	27.0477	38.9406	59.3152	ZNF620
ENSG00000177853	-1.02237	0.00286581	0.0202251	284.191	212.179	430.764	377.658	437.871	125.83	114.226	252.435	ZNF518A
ENSG00000177854	1.1334	0.00684523	0.0395194	39.0422	47.8877	46.4034	22.4669	26.58	90.5509	103.842	31.7268	TMEM187
ENSG00000177989	1.60694	0.00376276	0.0249186	21.791	22.102	13.1331	16.0478	8.39369	62.3272	77.8812	23.4502	ODF3B
ENSG00000178026	1.88353	6.55227e-05	0.000896571	55.3855	69.9897	24.515	31.0258	20.2847	148.174	185.617	49.6593	LRRC75B
ENSG00000178163	-1.00846	5.20291e-05	0.000741518	220.634	179.763	306.438	433.291	413.389	185.806	124.61	278.644	ZNF518B
ENSG00000178343	-6.77148	1.12229e-09	5.60069e-08	0	0	20.1373	18.1875	21.6837	0	0	20.6914	SHISA3
ENSG00000178538	-2.21768	3.92135e-12	3.47298e-10	205.199	292.483	880.79	1129.77	1103.07	116.423	186.915	620.741	CA8
ENSG00000178776	-1.29588	0.000605779	0.00576079	65.3731	54.5183	79.6738	105.916	156.682	42.3355	72.6892	235.882	C5orf46
ENSG00000178803	1.77707	0.0010671	0.00912499	13.6194	11.051	5.25322	4.27942	4.19684	24.6957	16.8743	5.5177	ADORA2A-AS1
ENSG00000178814	2.88723	5.63408e-07	1.46006e-05	85.3482	89.8815	25.3906	24.6066	13.9895	352.796	324.505	52.4181	OPLAH
ENSG00000178852	1.06936	0.00188013	0.0144727	197.027	248.279	72.6695	78.0993	97.9263	118.775	96.0535	66.2124	EFCAB13
ENSG00000178860	1.43676	0.000105045	0.0013249	467.599	445.724	381.734	271.743	214.039	1148.94	1024.14	271.747	MSC
ENSG00000179008	-4.08583	7.32949e-19	1.8176e-16	3.63184	4.4204	84.9271	110.195	83.2374	9.40788	2.59604	56.5564	C14orf39
ENSG00000179046	-3.2732	0.000138676	0.00166566	16.3433	0.736733	99.8112	152.989	167.874	43.5115	1.29802	173.807	TRIML2
ENSG00000179148	-2.46834	0.000179714	0.00206609	6.35571	0	20.1373	38.5147	23.0826	8.2319	6.4901	30.3473	ALOXE3
ENSG00000179163	-1.70371	0.000248295	0.0027394	32.6865	33.8897	108.567	130.522	106.32	8.2319	50.6228	62.0741	FUCA1
ENSG00000179388	1.80608	5.35054e-07	1.39556e-05	75.3606	55.9917	23.6395	11.7684	25.8805	110.543	79.1793	30.3473	EGR3
ENSG00000179542	1.32141	0.00109781	0.00934298	1016.91	935.651	539.331	339.144	272.095	622.096	624.348	128.286	SLITRK4
ENSG00000179862	2.93637	0.000159547	0.00187033	19.9751	23.5755	13.1331	4.27942	10.4921	210.501	136.292	23.4502	CITED4
ENSG00000179954	1.19565	0.00904521	0.0490578	938.83	810.407	570.85	431.151	435.073	2233.2	2111.88	1224.93	SSC5D
ENSG00000180044	2.043	1.53084e-08	6.09273e-07	48.1218	47.8877	15.7597	13.9081	6.99474	52.9193	40.2386	9.65597	C3orf80
ENSG00000180139	2.5876	2.95622e-12	2.71283e-10	150.721	100.196	21.8884	10.6985	20.9842	174.046	112.928	37.2445	ACTA2-AS1
ENSG00000180332	-1.81203	0.00052679	0.00515564	166.157	136.296	567.348	764.946	471.445	145.822	90.8614	89.6626	KCTD4
ENSG00000180447	1.89818	6.06978e-11	4.02628e-09	146.181	145.873	47.279	41.7243	46.1653	224.613	245.326	70.3506	GAS1
ENSG00000180525	-1.32604	0.00559811	0.034012	14.5273	5.89387	24.515	50.2831	34.2742	19.9918	12.9802	22.0708	PRR26
ENSG00000180537	-1.579	3.06276e-06	6.47883e-05	256.044	393.416	705.683	943.611	860.353	143.47	215.471	509.008	RNF182
ENSG00000180574	-1.16874	0.00301359	0.0210766	16.3433	11.051	33.2704	25.6765	22.3832	7.05591	14.2782	28.9679	EIF2S3B
ENSG00000180611	-1.14719	1.76924e-12	1.69753e-10	641.019	526.764	1215.24	1367.27	1322.01	583.289	480.268	1037.33	MB21D2
ENSG00000180777	-1.40145	0.000425144	0.00433453	115.311	81.0407	196.996	208.622	213.34	51.7434	31.1525	122.769	ANKRD30B
ENSG00000180855	-1.27611	0.000137404	0.00165822	46.3059	35.3632	106.815	99.4964	100.724	30.5756	33.7485	45.521	ZNF443
ENSG00000180875	1.4506	0.000652438	0.00612501	632.848	945.965	547.21	237.508	180.464	518.61	965.727	154.496	GREM2
ENSG00000180998	-1.51087	1.70169e-06	3.85788e-05	123.482	117.877	240.773	333.794	316.862	63.5032	70.0931	182.084	GPR137C
ENSG00000181072	2.14865	7.37911e-06	0.000139116	106.231	106.826	12.2575	6.41912	34.9737	69.3831	67.4971	24.8296	CHRM2
ENSG00000181433	-7.39931	2.78098e-12	2.57624e-10	0.907959	0	93.6824	106.985	97.9263	0	1.29802	37.2445	SAGE1
ENSG00000181634	-1.88418	2.0897e-06	4.59534e-05	10.8955	8.8408	27.1416	51.353	42.6679	12.9358	9.08614	31.7268	TNFSF15
ENSG00000182109	1.35615	0.00151627	0.0121415	55.3855	44.9407	14.0086	11.7684	16.7874	52.9193	59.709	42.7621	NA
ENSG00000182165	1.48581	2.19532e-07	6.42221e-06	69.0049	72.9366	35.897	32.0956	22.3832	90.5509	109.034	31.7268	TP53TG1
ENSG00000182326	1.60036	1.91625e-07	5.75195e-06	1903.99	2048.12	929.82	705.034	490.331	1593.46	1940.54	342.097	C1S
ENSG00000182492	1.88612	1.07891e-05	0.000192592	9710.62	9359.46	4791.81	2346.19	2532.1	20769.1	20900.7	6763.32	BGN
ENSG00000182580	1.32999	0.00751211	0.0424571	44.49	58.2019	52.5322	21.3971	17.4868	125.83	122.014	48.2798	EPHB3
ENSG00000182585	-3.12702	0.000103076	0.00130313	0.907959	2.2102	24.515	39.5846	19.5853	4.70394	2.59604	4.13827	EPGN
ENSG00000182795	-2.05428	0.000908636	0.00799907	3.63184	6.6306	28.0172	21.3971	18.1863	2.35197	5.19208	6.89712	C1orf116
ENSG00000182796	1.73291	1.98932e-08	7.7267e-07	336.853	301.324	126.953	60.9817	96.5274	433.939	410.175	162.772	TMEM198B
ENSG00000182798	-1.51331	1.09735e-10	6.99139e-09	60.8333	58.9387	227.64	156.199	152.485	51.7434	71.3911	154.496	MAGEB17
ENSG00000182809	2.35444	7.69594e-06	0.000143411	473.047	696.95	195.245	178.666	135.698	1298.29	2339.03	431.76	CRIP2
ENSG00000182871	1.92411	0.00278125	0.019732	2335.27	1849.2	404.498	575.581	782.012	7709.76	5707.4	2877.48	COL18A1
ENSG00000182901	-1.2438	0.00746648	0.0422733	14.5273	19.8918	14.8841	33.1655	41.9684	10.5839	10.3842	44.1416	RGS7
ENSG00000183378	1.22003	1.81209e-05	0.000298228	202.475	129.665	86.6781	68.4706	81.8384	206.973	131.1	48.2798	OVCH2
ENSG00000183486	-3.93767	1.87378e-12	1.78719e-10	16.3433	3.68367	275.794	440.78	337.846	36.4555	23.3644	147.598	MX2
ENSG00000183615	1.38552	0.000994657	0.00861982	25.4229	36.8367	14.0086	17.1177	11.1916	63.5032	46.7287	24.8296	FAM167B
ENSG00000183668	-1.68096	1.69514e-12	1.63616e-10	104.415	80.3039	259.159	364.82	279.09	84.6709	76.5832	206.914	PSG9
ENSG00000183691	-1.6718	0.000249982	0.00275612	51.7537	16.2081	135.708	147.64	176.967	90.5509	62.305	238.64	NOG
ENSG00000183762	-1.19882	6.67637e-06	0.000127963	59.9253	61.8856	138.335	224.669	164.376	89.3749	99.9476	182.084	KREMEN1
ENSG00000183801	-5.29289	2.16997e-13	2.5719e-11	0.907959	0	213.631	287.791	208.443	12.9358	9.08614	136.563	OLFML1
ENSG00000183831	-1.69077	0.00112255	0.00948395	29.0547	36.8367	135.708	139.081	89.5327	23.5197	29.8545	20.6914	ANKRD45
ENSG00000184005	-1.09671	0.000235533	0.00262556	151.629	102.406	272.292	244.997	264.401	115.247	68.7951	155.875	ST6GALNAC3
ENSG00000184258	1.26994	0.00145145	0.0117273	58.1094	50.0979	21.8884	9.62868	20.9842	29.3996	32.4505	17.9325	CDR1
ENSG00000184465	1.13428	1.98122e-11	1.49231e-09	949.725	1074.89	415.004	353.052	462.352	929.028	900.826	528.319	WDR27
ENSG00000184486	-1.27739	0.000180854	0.00207635	41.7661	44.204	49.9056	124.103	123.807	37.6315	36.3446	91.042	POU3F2
ENSG00000184530	-1.79964	0.000218881	0.00246207	23.6069	25.7857	70.9185	111.265	71.3463	21.1677	9.08614	26.2091	C6orf58
ENSG00000184678	1.3058	8.06628e-13	8.44288e-11	169.788	176.079	65.6653	81.3089	62.2532	189.334	170.041	78.6272	HIST2H2BE
ENSG00000184923	1.28931	0.00623895	0.0370135	18.1592	16.9449	5.25322	7.48898	6.29526	12.9358	23.3644	11.0354	NUTM2A
ENSG00000184979	-2.12115	2.0124e-07	5.9959e-06	16.3433	13.9979	105.064	141.221	91.6311	28.2236	33.7485	55.177	USP18
ENSG00000184992	-1.45101	1.14841e-12	1.14977e-10	193.395	212.916	408	457.897	567.973	144.646	183.021	579.358	BRI3BP
ENSG00000184995	1.25323	0.00173205	0.0134874	241.517	260.067	58.661	42.7942	131.501	132.886	154.464	97.9391	IFNE
ENSG00000185052	1.95619	9.24563e-14	1.1643e-11	443.992	444.987	80.5494	145.5	130.802	571.529	590.599	173.807	SLC24A3
ENSG00000185053	-4.8145	0.000374629	0.00387838	2.72388	0	456.155	102.706	46.8647	11.7599	7.78812	11.0354	SGCZ
ENSG00000185055	1.68211	0.00808107	0.0450099	39.9502	18.4183	4.37768	8.55883	7.69421	8.2319	12.9802	4.13827	EFCAB10
ENSG00000185104	-1.23953	2.61953e-16	5.21287e-14	956.989	804.513	1786.09	2109.75	2094.22	804.374	712.613	1754.63	FAF1
ENSG00000185149	2.29772	2.52091e-05	0.000400336	77.1765	70.7264	26.2661	10.6985	9.09316	74.0871	28.5565	4.13827	NPY2R
ENSG00000185187	3.13811	1.61945e-09	7.81556e-08	34.5024	36.0999	5.25322	9.62868	6.29526	91.7269	94.7555	8.27655	SIGIRR
ENSG00000185189	1.18276	0.000542611	0.0052912	922.487	1004.9	458.781	431.151	495.228	1514.67	1840.59	943.526	NRBP2
ENSG00000185386	1.97228	1.74143e-05	0.000289382	94.4278	101.669	38.5236	32.0956	30.0774	277.533	214.173	75.8683	MAPK11
ENSG00000185482	1.10067	0.00464567	0.029377	39.9502	29.4693	8.75537	18.1875	16.0879	42.3355	36.3446	27.5885	STAC3
ENSG00000185495	3.20819	9.27677e-15	1.45177e-12	135.286	181.973	15.7597	10.6985	11.8911	74.0871	76.5832	12.4148	AC138393.1
ENSG00000185518	-1.97619	0.000259815	0.00284136	7.26367	10.3143	64.7897	31.0258	21.6837	15.2878	3.89406	27.5885	SV2B
ENSG00000185630	1.03268	1.73938e-06	3.93227e-05	1556.24	1496.31	868.532	708.243	581.263	1308.87	1121.49	521.422	PBX1
ENSG00000185745	-1.51276	6.40766e-06	0.000123399	304.166	305.008	821.253	1091.25	758.929	222.261	228.452	354.512	IFIT1
ENSG00000185760	-1.72335	2.31069e-05	0.000370239	40.8582	33.8897	58.661	90.9376	137.796	19.9918	44.1327	172.428	KCNQ5
ENSG00000185860	-1.3108	1.88575e-05	0.000308971	37.2263	54.5183	74.4206	96.2868	95.8279	23.5197	31.1525	103.457	CCDC190
ENSG00000185946	1.07917	0.000824718	0.00741005	631.032	653.482	175.107	193.644	326.654	369.259	321.909	240.02	RNPC3
ENSG00000185950	1.17976	1.58452e-07	4.90227e-06	831.691	959.963	371.228	486.784	439.969	1188.92	1305.81	595.911	IRS2
ENSG00000185962	-2.83673	0.00187093	0.0144226	0.907959	0	13.1331	43.864	21.6837	3.52796	9.08614	11.0354	LCE3A
ENSG00000185986	2.22329	0.000164775	0.0019177	25.4229	41.2571	7.00429	5.34927	2.7979	51.7434	46.7287	22.0708	SDHAP3
ENSG00000186088	1.27293	8.18583e-05	0.00107274	887.984	965.857	406.249	340.214	316.862	525.665	599.686	168.29	GSAP
ENSG00000186148	1.44872	0.000373051	0.00386454	45.398	51.5713	21.8884	8.55883	26.58	56.4473	37.6426	11.0354	AC013268.1
ENSG00000186281	-2.97907	1.45297e-08	5.81152e-07	5.44776	13.2612	30.6438	82.3787	74.1442	7.05591	14.2782	129.666	GPAT2
ENSG00000186340	1.29227	1.67385e-09	8.03e-08	43182.5	43423.1	17959	13390.3	17273.5	46903	47807.4	25413.1	THBS2
ENSG00000186472	-2.10739	2.66488e-21	8.59103e-19	262.4	237.965	882.541	1004.59	1057.6	212.853	146.676	771.098	PCLO
ENSG00000186479	-2.62813	2.09336e-07	6.19135e-06	5.44776	2.2102	34.1459	32.0956	24.4816	4.70394	6.4901	20.6914	RGS7BP
ENSG00000186517	-2.00166	8.60989e-06	0.00015879	13.6194	7.36733	68.2919	102.706	64.3516	30.5756	22.0664	52.4181	ARHGAP30
ENSG00000186603	2.03979	0.00340244	0.023034	8.17163	8.8408	3.50215	6.41912	2.09842	32.9276	20.7683	5.5177	HPDL
ENSG00000186815	1.16088	9.02802e-07	2.21159e-05	2034.74	2013.49	1293.17	1283.82	938.694	3144.58	3312.55	1182.17	TPCN1
ENSG00000186847	-2.7445	4.52951e-06	9.14928e-05	8.17163	9.57753	176.858	69.5405	76.2427	37.6315	31.1525	249.676	KRT14
ENSG00000186960	2.03155	0.000737365	0.00677242	23.6069	15.4714	2.62661	2.13971	6.29526	34.1036	24.6624	13.7942	LINC01551
ENSG00000186977	-8.57962	1.04244e-15	1.82643e-13	0	0	69.1674	90.9376	68.5484	0	0	53.7975	KRTAP19-5
ENSG00000187068	-1.18976	3.39325e-05	0.000517463	158.893	191.551	310.816	442.92	379.115	109.367	131.1	217.949	C3orf70
ENSG00000187098	-2.23476	1.06302e-07	3.42012e-06	26.3308	40.5203	95.4335	118.754	197.252	10.5839	41.5367	150.357	MITF
ENSG00000187229	-3.69691	2.66358e-07	7.61245e-06	1.81592	0.736733	38.5236	52.4228	32.1758	4.70394	3.89406	11.0354	AC100800.1
ENSG00000187908	1.90044	1.43415e-05	0.000246451	926.118	954.806	342.335	431.151	288.883	1247.72	1121.49	74.4889	DMBT1
ENSG00000188002	1.9539	1.05538e-10	6.83202e-09	59.0173	58.2019	14.0086	16.0478	12.5905	61.1512	46.7287	16.5531	AC026412.1
ENSG00000188186	1.0774	0.000317557	0.00338314	582.91	518.66	314.318	274.952	288.183	893.749	933.277	511.766	LAMTOR4
ENSG00000188372	1.85176	0.00588041	0.0353548	28.1467	35.3632	22.764	6.41912	1.39895	55.2713	25.9604	9.65597	ZP3
ENSG00000188487	-2.6612	2.60902e-07	7.48306e-06	1.81592	5.15713	20.1373	26.7463	37.7716	7.05591	5.19208	34.4856	INSC
ENSG00000188511	1.87981	0.00049671	0.00493161	26.3308	19.8918	13.1331	3.20956	7.69421	57.6233	35.0466	13.7942	C22orf34
ENSG00000188581	-2.87937	0.000114021	0.00142143	1.81592	2.2102	28.0172	26.7463	34.2742	5.87993	16.8743	100.698	KRTAP1-1
ENSG00000188707	2.59303	4.2016e-13	4.70316e-11	86.2561	80.3039	24.515	13.9081	8.39369	116.423	103.842	17.9325	ZBED6CL
ENSG00000188820	1.56606	0.00777823	0.0436247	15.4353	8.10407	6.12876	6.41912	6.29526	37.6315	19.4703	8.27655	CALHM6
ENSG00000188848	-5.58756	4.83276e-32	4.58231e-29	4.5398	8.10407	328.326	390.497	311.965	4.70394	6.4901	129.666	BEND4
ENSG00000188868	-1.86477	4.78867e-05	0.000691035	25.4229	9.57753	73.5451	50.2831	60.8542	11.7599	11.6822	27.5885	ZNF563
ENSG00000188991	-2.13518	0.0060344	0.036119	3.63184	4.4204	20.1373	48.1434	18.1863	11.7599	1.29802	5.5177	SLC15A5
ENSG00000189001	-1.28922	0.000713097	0.00657952	14.5273	19.8918	69.1674	43.864	38.4711	31.7516	14.2782	44.1416	SBSN
ENSG00000189068	-3.85211	9.70701e-14	1.21292e-11	7.26367	2.2102	54.2833	75.9596	94.429	11.7599	1.29802	95.1803	VSTM1
ENSG00000189077	1.16135	0.00744385	0.0421897	261.492	254.91	193.494	103.776	137.097	526.841	636.03	317.268	TMEM120A
ENSG00000189120	-1.86603	2.12278e-07	6.25542e-06	20.8831	9.57753	70.0429	66.3309	44.0669	15.2878	18.1723	49.6593	SP6
ENSG00000189136	1.38095	9.00895e-06	0.000165017	93.5198	145.136	31.5193	32.0956	44.7663	111.719	94.7555	64.8329	UBE2Q2P1
ENSG00000189184	1.03108	0.00116003	0.00974901	1459.09	1295.91	831.76	565.953	552.584	1053.68	828.137	317.268	PCDH18
ENSG00000189398	-1.73673	6.29939e-06	0.000121897	9.98755	8.10407	24.515	32.0956	32.1758	8.2319	9.08614	28.9679	OR7E12P
ENSG00000189423	1.50953	0.00302975	0.0211413	83.5322	78.8305	18.3863	5.34927	31.4763	58.7993	44.1327	38.6239	USP32P3
ENSG00000196123	1.13011	0.00382421	0.0252529	493.022	507.609	193.494	218.25	240.619	857.293	806.071	566.943	KIAA0895L
ENSG00000196187	1.13041	7.72505e-05	0.00102591	844.402	996.8	443.022	363.75	438.57	1264.18	1316.19	776.616	TMEM63A
ENSG00000196263	3.74258	5.42265e-07	1.4098e-05	46.3059	67.0427	11.382	1.06985	1.39895	36.4555	44.1327	0	ZNF471
ENSG00000196405	1.07642	0.0040784	0.0264227	835.322	663.06	605.871	314.537	360.229	1591.11	1200.67	754.545	EVL
ENSG00000196406	-2.46037	3.89151e-07	1.06137e-05	15.4353	25.7857	171.605	102.706	95.1284	5.87993	32.4505	67.5918	SPANXD
ENSG00000196440	-1.59257	6.56633e-16	1.21658e-13	237.885	249.016	545.459	636.563	782.012	171.694	231.048	724.198	ARMCX4
ENSG00000196456	1.98519	6.3041e-05	0.00086851	189.763	179.763	98.9356	44.9339	57.3569	537.425	486.758	151.737	ZNF775
ENSG00000196460	1.08999	1.29912e-05	0.000226874	770.857	1158.88	402.747	393.706	374.918	525.665	837.223	376.583	RFX8
ENSG00000196466	-1.20719	0.000162668	0.00189728	60.8333	66.306	126.077	139.081	125.905	34.1036	38.9406	74.4889	ZNF799
ENSG00000196668	2.76049	2.66226e-08	1.0003e-06	59.0173	42.7305	5.25322	3.20956	6.29526	68.2071	40.2386	17.9325	LINC00173
ENSG00000197016	1.28885	3.03545e-06	6.42948e-05	185.224	217.336	74.4206	65.2611	79.0405	128.182	127.206	49.6593	ZNF470
ENSG00000197106	-1.73699	0.00193477	0.0148071	2.72388	6.6306	21.0129	26.7463	24.4816	14.1118	14.2782	51.0387	SLC6A17
ENSG00000197142	1.25116	0.00172166	0.013452	98.9676	75.8835	62.1631	32.0956	28.6784	70.5591	86.9674	15.1737	ACSL5
ENSG00000197410	-2.31976	4.22259e-06	8.63756e-05	3.63184	10.3143	27.1416	42.7942	51.0616	9.40788	5.19208	22.0708	DCHS2
ENSG00000197448	1.00664	0.000127482	0.00156623	982.412	957.753	696.927	479.295	451.161	1452.34	1435.61	776.616	GSTK1
ENSG00000197457	2.77264	6.17749e-05	0.000853988	23.6069	30.2061	10.5064	0	5.59579	70.5591	68.7951	12.4148	STMN3
ENSG00000197462	2.43993	6.35492e-05	0.000874765	19.0671	30.9428	2.62661	1.06985	4.19684	18.8158	14.2782	8.27655	AC003975.1
ENSG00000197471	-3.89254	2.46589e-43	4.41642e-40	14.5273	22.8387	281.047	356.261	306.37	23.5197	32.4505	422.104	SPN
ENSG00000197472	-1.47203	0.00223433	0.0166275	17.2512	8.10407	46.4034	34.2353	35.6732	16.4638	6.4901	16.5531	ZNF695
ENSG00000197536	1.33646	7.74394e-05	0.00102736	99.8755	123.034	56.0343	31.0258	53.16	189.334	145.378	81.386	C5orf56
ENSG00000197580	1.86128	6.01129e-05	0.00083603	34.5024	33.153	8.75537	5.34927	11.1916	22.3437	20.7683	4.13827	BCO2
ENSG00000197614	-2.35766	4.91381e-14	6.60047e-12	59.0173	55.255	210.129	194.713	327.354	25.8717	57.1129	282.782	MFAP5
ENSG00000197816	1.92401	2.44547e-06	5.28398e-05	95.3357	72.1999	12.2575	9.62868	24.4816	67.0312	72.6892	35.865	CCDC180
ENSG00000197822	-1.5211	4.07875e-05	0.000603168	39.9502	15.4714	91.9314	84.5185	75.5432	31.7516	19.4703	52.4181	OCLN
ENSG00000197903	-1.34539	4.11829e-10	2.25026e-08	88.072	80.3039	203.125	221.46	248.313	114.071	102.544	302.094	HIST1H2BK
ENSG00000197928	-1.45937	0.00486774	0.0304711	159.801	53.0448	253.906	346.633	347.639	166.99	29.8545	177.946	ZNF677
ENSG00000197935	-2.2409	1.95208e-06	4.31628e-05	10.8955	5.89387	30.6438	58.842	44.0669	11.7599	5.19208	24.8296	ZNF311
ENSG00000198021	-4.68677	9.69218e-16	1.71679e-13	2.72388	2.94693	54.2833	66.3309	62.2532	2.35197	0	40.0033	SPANXA1
ENSG00000198157	1.20362	0.00358741	0.023994	208.831	170.185	65.6653	70.6104	69.2479	81.143	84.3713	30.3473	HMGN5
ENSG00000198185	2.37234	0.000137562	0.00165846	159.801	107.563	54.2833	7.48898	14.689	97.6068	71.3911	6.89712	ZNF334
ENSG00000198342	-2.52062	7.92505e-05	0.0010488	1.81592	4.4204	51.6567	67.4008	44.7663	22.3437	6.4901	31.7268	ZNF442
ENSG00000198420	1.95931	4.70036e-06	9.44702e-05	1984.8	1667.96	658.404	248.206	317.561	981.948	886.548	194.499	TCAF1
ENSG00000198478	-1.13487	0.00232178	0.0171202	922.487	727.892	1534.82	1895.78	1533.25	583.289	351.764	715.921	SH3BGRL2
ENSG00000198556	1.16626	1.91099e-05	0.000311773	315.062	287.326	97.1846	86.6582	141.294	284.588	264.796	190.361	ZNF789
ENSG00000198573	-3.97797	3.21906e-25	1.99569e-22	4.5398	8.10407	91.0558	98.4266	113.315	2.35197	11.6822	114.492	SPANXC
ENSG00000198598	1.44454	0.00448487	0.0285738	132.562	140.716	112.069	60.9817	55.2584	385.723	425.751	171.049	MMP17
ENSG00000198626	-4.17621	1.23264e-87	1.98689e-83	25.4229	27.9959	570.85	584.14	626.729	41.1595	35.0466	518.663	RYR2
ENSG00000198711	1.61858	0.00385503	0.0253789	14.5273	19.8918	3.50215	5.34927	5.59579	29.3996	27.2584	16.5531	SSBP3-AS1
ENSG00000198715	2.4412	7.53003e-08	2.52342e-06	318.694	279.222	134.833	37.4449	35.6732	342.212	397.194	37.2445	GLMP
ENSG00000198732	1.89076	1.43305e-33	1.53996e-30	1383.73	1337.91	394.867	463.247	409.192	1602.87	1639.4	337.959	SMOC1
ENSG00000198780	-2.94932	1.67e-08	6.58161e-07	39.9502	14.7347	172.481	193.644	200.05	27.0477	3.89406	99.3185	FAM169A
ENSG00000198846	-1.48341	4.5063e-06	9.1138e-05	16.3433	17.6816	70.0429	55.6324	46.1653	18.8158	24.6624	41.3827	TOX
ENSG00000198848	-1.83936	0.00248426	0.0180053	39.0422	37.5734	259.159	248.206	162.977	71.7351	45.4307	20.6914	CES1
ENSG00000198890	-1.07325	2.4208e-17	5.57442e-15	374.987	401.52	727.571	875.14	792.504	403.363	355.658	841.449	PRMT6
ENSG00000198930	4.56427	1.09232e-23	4.63343e-21	421.293	186.394	17.5107	14.978	15.3884	604.456	194.703	11.0354	CSAG1
ENSG00000198948	-1.05997	0.000386233	0.00398062	86.2561	103.143	126.953	244.997	173.47	55.2713	84.3713	143.46	MFAP3L
ENSG00000203650	-3.17222	5.2673e-05	0.00074937	3.63184	0.736733	66.5408	78.0993	57.3569	16.4638	3.89406	13.7942	LINC01285
ENSG00000203709	1.87237	9.04064e-08	2.93803e-06	49.0298	50.0979	7.00429	13.9081	17.4868	58.7993	46.7287	17.9325	MIR29B2CHG
ENSG00000203711	-2.20428	4.20463e-05	0.000620645	6.35571	4.4204	17.5107	39.5846	39.87	14.1118	10.3842	62.0741	C6orf99
ENSG00000203727	-1.93708	2.42045e-06	5.25214e-05	74.4527	90.6182	204.876	308.118	260.204	29.3996	40.2386	132.425	SAMD5
ENSG00000203926	-4.45807	1.58942e-11	1.23172e-09	2.72388	2.2102	27.1416	38.5147	45.4658	0	1.29802	37.2445	SPANXA2
ENSG00000204065	-4.56396	2.49958e-10	1.48128e-08	1.81592	0.736733	36.7725	36.375	46.8647	2.35197	1.29802	19.3119	TCEAL5
ENSG00000204219	2.59598	3.18408e-10	1.82001e-08	117.127	138.506	47.279	16.0478	17.4868	161.11	247.922	28.9679	TCEA3
ENSG00000204257	-1.01095	0.000246275	0.00272221	44.49	29.4693	82.3004	88.7979	56.6574	34.1036	42.8347	75.8683	HLA-DMA
ENSG00000204301	-2.31336	6.23636e-06	0.000121259	156.169	57.4652	693.425	825.927	733.049	389.251	124.61	1358.73	NOTCH4
ENSG00000204311	1.35637	0.00165933	0.0130218	54.4776	36.0999	10.5064	13.9081	25.1811	28.2236	36.3446	9.65597	PJVK
ENSG00000204362	1.65088	1.77742e-07	5.43217e-06	393.146	305.008	86.6781	78.0993	123.807	449.226	367.34	195.878	AL590644.1
ENSG00000204618	1.69096	0.000231687	0.00258627	51.7537	47.1509	14.0086	6.41912	20.9842	41.1595	24.6624	8.27655	RNF39
ENSG00000204681	1.01007	0.00164216	0.0129249	1571.68	1502.94	567.348	527.438	905.819	1826.31	1886.02	1371.15	GABBR1
ENSG00000204789	-3.56848	7.21389e-10	3.77535e-08	9.98755	5.15713	98.0601	87.728	79.0405	3.52796	5.19208	20.6914	ZNF204P
ENSG00000204946	1.81961	3.51757e-05	0.000533393	338.669	319.005	91.0558	63.1214	100.025	557.417	571.129	253.814	ZNF783
ENSG00000204956	1.16971	1.80518e-05	0.000298131	45.398	49.3611	25.3906	20.3272	22.3832	54.0953	58.4109	23.4502	PCDHGA1
ENSG00000205085	1.8796	0.000796491	0.00720927	13.6194	19.1551	7.00429	3.20956	2.09842	14.1118	16.8743	5.5177	FAM71F2
ENSG00000205097	-6.18426	8.65613e-08	2.83594e-06	0.907959	0	40.2747	57.7721	39.1705	1.17599	0	8.27655	FRG2
ENSG00000205238	2.09541	0.000223998	0.00250845	52.6616	75.1468	14.8841	6.41912	6.99474	89.3749	77.8812	42.7621	SPDYE2
ENSG00000205269	-1.60042	0.000586145	0.0056263	49.9378	62.6223	148.841	140.151	148.988	14.1118	36.3446	59.3152	TMEM170B
ENSG00000205426	-2.38864	2.67164e-09	1.23748e-07	357.736	354.369	2462.88	3175.33	2634.22	921.972	894.336	4957.65	KRT81
ENSG00000205885	1.51267	3.83443e-10	2.11668e-08	210.647	235.755	80.5494	47.0736	76.9421	166.99	212.875	85.5243	C1RL-AS1
ENSG00000205978	-1.10961	1.76849e-05	0.000293274	81.7163	97.2488	187.365	192.574	225.231	125.83	123.312	317.268	NYNRIN
ENSG00000206105	-7.27832	1.34545e-10	8.43864e-09	0	0	18.3863	33.1655	40.5695	0	0	22.0708	KRTAP20-4
ENSG00000206190	-1.17029	0.00477607	0.0299904	141.642	140.716	281.923	433.291	389.607	251.661	330.995	840.069	ATP10A
ENSG00000206337	-1.92606	5.52909e-08	1.90029e-06	151.629	128.928	675.039	767.085	521.108	181.102	119.418	242.779	HCP5
ENSG00000206532	-1.60952	0.000133656	0.00162352	26.3308	16.2081	66.5408	60.9817	52.4605	12.9358	11.6822	26.2091	AC117402.1
ENSG00000206579	-1.79406	0.00799509	0.0446545	4.5398	1.47347	18.3863	27.8162	13.9895	10.5839	3.89406	8.27655	XKR4
ENSG00000206820	-2.84392	1.00469e-05	0.000181554	1.81592	5.15713	15.7597	29.9559	18.1863	0	5.19208	26.2091	RNU1-138P
ENSG00000207523	1.92145	0.00357538	0.0239536	36.3184	22.8387	2.62661	3.20956	4.19684	18.8158	11.6822	15.1737	SNORA66
ENSG00000207741	1.92339	0.0045074	0.028673	17.2512	19.8918	3.50215	0	7.69421	9.40788	18.1723	5.5177	MIR590
ENSG00000211448	-1.1019	0.00014159	0.00169561	35.4104	30.9428	80.5494	93.0773	77.6416	55.2713	27.2584	66.2124	DIO2
ENSG00000211772	-2.75224	0.00156476	0.0124309	0.907959	2.2102	79.6738	16.0478	16.7874	16.4638	2.59604	33.1062	TRBC2
ENSG00000212694	1.42478	1.39065e-05	0.000239999	174.328	128.928	81.4249	54.5625	70.6469	298.7	229.75	103.457	LINC01089
ENSG00000212710	-1.42821	0.00318736	0.0219148	9.98755	14.7347	25.3906	41.7243	37.0721	10.5839	7.78812	12.4148	CTAGE1
ENSG00000213057	1.54287	0.00843769	0.0465459	18.1592	18.4183	3.50215	1.06985	9.79263	15.2878	18.1723	9.65597	C1orf220
ENSG00000213071	-1.42783	0.000793215	0.00719518	19.0671	13.9979	33.2704	24.6066	55.2584	21.1677	11.6822	64.8329	LPAL2
ENSG00000213085	-1.20284	8.72999e-06	0.000160638	27.2388	32.4163	53.4077	68.4706	83.2374	31.7516	33.7485	82.7655	CFAP45
ENSG00000213190	-1.09168	0.000319107	0.00339517	1200.32	1146.36	2461.13	2633.98	2265.6	802.022	824.243	1107.68	MLLT11
ENSG00000213199	2.78392	1.19912e-06	2.84662e-05	43.582	41.2571	17.5107	6.41912	4.19684	90.5509	128.504	16.5531	ASIC3
ENSG00000213366	1.38487	1.64851e-14	2.50683e-12	640.111	612.225	259.159	180.805	240.619	618.568	673.673	295.197	GSTM2
ENSG00000213401	5.30423	7.30392e-27	5.11878e-24	503.917	274.065	13.1331	17.1177	14.689	840.83	311.525	2.75885	MAGEA12
ENSG00000213413	2.18798	1.17073e-05	0.000206919	28.1467	18.4183	3.50215	5.34927	7.69421	22.3437	23.3644	2.75885	PVRIG
ENSG00000213420	1.50138	0.00861548	0.0472618	30.8706	30.2061	12.2575	11.7684	16.7874	98.7828	73.9872	42.7621	GPC2
ENSG00000213654	-1.36624	0.000241888	0.00268525	98.0596	66.306	334.455	356.261	260.204	230.493	114.226	357.271	GPSM3
ENSG00000213760	1.09244	0.000716198	0.00660057	32.6865	35.3632	14.8841	21.3971	19.5853	41.1595	38.9406	12.4148	ATP6V1G2
ENSG00000213967	1.69311	5.15118e-07	1.35895e-05	71.7288	53.0448	19.2618	16.0478	17.4868	55.2713	36.3446	13.7942	ZNF726
ENSG00000213988	-1.50308	0.000132014	0.00160478	18.1592	29.4693	70.9185	60.9817	82.5379	32.9276	10.3842	44.1416	ZNF90
ENSG00000214021	1.61562	1.053e-07	3.40145e-06	634.663	579.072	134.833	179.735	222.433	833.774	651.606	346.235	TTLL3
ENSG00000214022	1.12323	0.00672808	0.0390022	1065.04	1049.11	710.936	488.923	593.154	2416.65	2305.28	1346.32	REPIN1
ENSG00000214049	-4.45614	4.66207e-40	6.83162e-37	7.26367	6.6306	136.584	157.269	183.262	8.2319	7.78812	171.049	UCA1
ENSG00000214106	1.37642	2.20746e-06	4.83453e-05	114.403	124.508	66.5408	32.0956	33.5747	104.663	103.842	40.0033	PAXIP1-AS2
ENSG00000214189	-1.33619	0.000114167	0.00142215	444.9	447.197	900.927	1045.25	940.792	225.789	219.365	493.834	ZNF788
ENSG00000214253	1.00004	4.26578e-06	8.70382e-05	914.315	956.28	595.365	486.784	485.435	1332.39	1329.17	699.368	FIS1
ENSG00000214279	1.9472	1.50705e-06	3.45059e-05	76.2686	89.1447	16.6352	9.62868	30.0774	116.423	81.7753	38.6239	SCART1
ENSG00000214517	-1.06412	5.87874e-14	7.70401e-12	1261.16	1180.25	2662.51	3096.16	2809.79	1578.17	1405.76	2767.12	PPME1
ENSG00000217648	-1.163	4.81589e-08	1.68755e-06	44.49	53.7815	91.9314	113.405	111.216	49.3914	41.5367	110.354	AL136116.3
ENSG00000219665	-1.12382	3.82667e-06	7.90795e-05	102.599	68.5162	198.747	184.015	174.868	102.311	57.1129	162.772	ZNF433-AS1
ENSG00000221818	-1.56327	0.00916474	0.0495156	1.81592	14.7347	30.6438	41.7243	34.2742	27.0477	14.2782	63.4535	EBF2
ENSG00000221838	1.28331	8.14913e-05	0.00106883	393.146	405.94	236.395	148.71	200.749	660.904	756.746	325.544	AP4M1
ENSG00000221852	1.62506	0.000134732	0.00163289	254.229	436.146	144.464	96.2868	110.517	165.814	690.547	150.357	KRTAP1-5
ENSG00000221867	-2.95606	3.7146e-08	1.33651e-06	36.3184	7.36733	127.828	235.368	198.651	44.6874	9.08614	191.74	MAGEA3
ENSG00000221869	2.71739	2.35623e-05	0.000377032	192.487	198.181	78.7983	79.1692	47.5642	1017.23	1170.81	187.602	CEBPD
ENSG00000221890	-1.29326	0.00516052	0.0319563	19.9751	11.051	77.9228	73.8199	67.1495	56.4473	27.2584	57.9358	NPTXR
ENSG00000222000	-1.24179	0.00309104	0.021448	14.5273	10.3143	21.0129	41.7243	25.1811	8.2319	18.1723	33.1062	AC092675.1
ENSG00000222005	2.93575	2.00003e-08	7.73105e-07	30.8706	38.3101	2.62661	4.27942	4.19684	25.8717	19.4703	4.13827	LINC01118
ENSG00000223374	1.94559	0.00123678	0.0102719	50.8457	41.2571	1.75107	5.34927	14.689	22.3437	31.1525	16.5531	AC005104.1
ENSG00000223414	3.03891	4.80166e-13	5.30123e-11	82.6243	111.983	7.00429	17.1177	11.8911	52.9193	97.3516	5.5177	LINC00473
ENSG00000223459	2.54568	2.21452e-07	6.46663e-06	37.2263	56.7285	13.1331	14.978	6.29526	91.7269	122.014	19.3119	TCAF1P1
ENSG00000223511	-3.52504	3.61089e-06	7.53201e-05	0	1.47347	56.9099	25.6765	30.7769	8.2319	2.59604	19.3119	AL683807.1
ENSG00000223547	-1.36133	5.77321e-07	1.48656e-05	108.047	90.6182	221.511	255.695	273.494	95.2548	58.4109	155.875	ZNF844
ENSG00000223638	-3.20487	9.68631e-13	9.94482e-11	6.35571	7.36733	80.5494	94.1471	62.2532	8.2319	7.78812	34.4856	RFPL4A
ENSG00000223652	-2.53797	0.000599603	0.00571218	3.63184	0.736733	7.00429	19.2574	18.1863	3.52796	6.4901	35.865	AC106786.1
ENSG00000223705	1.97081	2.87789e-09	1.32161e-07	457.611	393.416	94.558	71.6802	105.621	505.674	520.506	209.672	NSUN5P1
ENSG00000223745	1.28846	1.37292e-08	5.51873e-07	285.099	286.589	112.944	71.6802	132.201	262.245	269.988	135.184	CCDC18-AS1
ENSG00000223749	1.25979	0.00307612	0.0213808	1119.51	828.825	316.944	224.669	490.331	1594.64	1117.6	915.938	MIR503HG
ENSG00000223756	-1.78749	1.42198e-06	3.28892e-05	40.8582	27.9959	177.734	108.055	156.682	79.967	32.4505	179.325	TSSC2
ENSG00000223813	3.41073	4.80951e-06	9.61842e-05	39.9502	39.7836	0	0	8.39369	38.8075	45.4307	6.89712	AC007255.1
ENSG00000223855	1.56095	0.00194278	0.0148486	27.2388	20.6285	7.00429	8.55883	6.99474	48.2154	27.2584	20.6914	AC147651.1
ENSG00000223865	-2.53227	1.06212e-06	2.56291e-05	30.8706	7.36733	141.837	172.246	146.19	58.7993	15.5762	186.222	HLA-DPB1
ENSG00000223901	1.48996	0.00321848	0.0221042	19.0671	13.2612	4.37768	4.27942	9.79263	25.8717	18.1723	8.27655	AP001469.1
ENSG00000223947	2.93039	2.64105e-06	5.67615e-05	24.5149	15.4714	3.50215	1.06985	3.49737	15.2878	22.0664	1.37942	AC016738.1
ENSG00000223969	1.16913	0.00702019	0.040227	13.6194	23.5755	7.87983	7.48898	9.09316	22.3437	19.4703	11.0354	AC002456.1
ENSG00000224020	1.0098	0.000313075	0.00334424	89.888	86.9345	54.2833	40.6544	49.6626	121.126	66.1991	34.4856	MIR181A2HG
ENSG00000224138	2.36394	5.70317e-06	0.000111972	92.6118	95.0386	14.8841	9.62868	9.79263	39.9835	23.3644	15.1737	AC000123.1
ENSG00000224321	-1.40052	0.00103897	0.00893185	9.07959	8.8408	40.2747	41.7243	37.0721	19.9918	16.8743	20.6914	RPL12P14
ENSG00000224468	1.595	0.00401116	0.0261447	88.98	95.7753	18.3863	6.41912	30.7769	27.0477	46.7287	30.3473	LAMC1-AS1
ENSG00000224596	2.21026	2.51659e-10	1.48589e-08	99.8755	80.3039	10.5064	24.6066	20.2847	61.1512	73.9872	12.4148	ZMIZ1-AS1
ENSG00000224659	2.58962	0.000973001	0.008464	32.6865	25.7857	21.8884	5.34927	1.39895	67.0312	58.4109	1.37942	GAGE12J
ENSG00000224689	-1.976	6.74809e-09	2.86617e-07	223.358	138.506	594.489	757.457	650.511	156.406	83.0733	366.927	ZNF812P
ENSG00000224713	1.17123	8.25008e-07	2.03649e-05	77.1765	78.0937	41.1502	36.375	42.6679	105.839	92.1595	34.4856	AC025165.1
ENSG00000224816	-2.01092	0.00672902	0.0390022	14.5273	15.4714	43.7768	58.842	33.5747	2.35197	2.59604	8.27655	NAP1L4P2
ENSG00000225138	1.86217	0.000573512	0.00552566	402.226	534.868	148.841	82.3787	140.594	712.647	1316.19	445.554	SLC9A3-AS1
ENSG00000225159	-1.10236	0.00829409	0.045968	9.07959	8.10407	16.6352	24.6066	18.1863	11.7599	11.6822	27.5885	NPM1P39
ENSG00000225177	1.26104	8.54619e-06	0.000158159	134.378	161.345	54.2833	58.842	64.3516	170.518	211.577	107.595	AL590617.2
ENSG00000225216	2.83572	8.45911e-08	2.7827e-06	32.6865	31.6795	0.875537	5.34927	4.19684	31.7516	20.7683	6.89712	AC007362.1
ENSG00000225313	1.1021	0.00324781	0.0222394	180.684	173.869	45.5279	41.7243	98.6258	168.166	142.782	125.528	AL513327.1
ENSG00000225383	-1.46923	0.00641302	0.0377508	7.26367	5.89387	25.3906	20.3272	27.2795	17.6398	2.59604	17.9325	SFTA1P
ENSG00000225422	1.50622	0.00663469	0.038678	26.3308	18.4183	3.50215	6.41912	4.19684	15.2878	14.2782	13.7942	RBMS1P1
ENSG00000225655	-1.12277	0.00861732	0.0472618	23.6069	44.9407	52.5322	58.842	62.2532	15.2878	12.9802	41.3827	BX255923.1
ENSG00000225760	-1.97595	0.0080306	0.0448063	10.8955	3.68367	34.1459	29.9559	11.1916	4.70394	1.29802	6.89712	LINC00431
ENSG00000225783	1.8095	0.00389328	0.0255142	147.089	131.139	96.309	10.6985	11.1916	155.23	111.63	37.2445	MIAT
ENSG00000225828	1.56953	0.0023496	0.0172937	115.311	113.457	35.897	14.978	47.5642	216.381	158.359	106.216	FAM229A
ENSG00000225855	1.10187	0.000129346	0.00158549	309.614	261.54	146.215	82.3787	108.418	284.588	158.359	136.563	RUSC1-AS1
ENSG00000226012	3.98031	1.54821e-05	0.000263523	32.6865	6.6306	1.75107	0	2.7979	27.0477	16.8743	0	AP001434.1
ENSG00000226053	-1.69566	0.00239521	0.0175015	24.5149	25.7857	41.1502	47.0736	74.8437	7.05591	3.89406	40.0033	LINC01776
ENSG00000226067	-2.67724	8.50008e-10	4.36346e-08	32.6865	33.8897	198.747	232.158	197.951	15.2878	25.9604	64.8329	LINC00623
ENSG00000226167	1.41564	0.00312304	0.0215775	33.5945	42.7305	6.12876	13.9081	8.39369	18.8158	23.3644	17.9325	AP4B1-AS1
ENSG00000226314	1.4802	4.32799e-05	0.000635943	68.0969	84.7243	30.6438	17.1177	23.7821	54.0953	40.2386	16.5531	ZNF192P1
ENSG00000226380	1.01521	0.000698328	0.00648408	325.049	451.617	98.9356	167.967	179.065	250.485	320.611	223.467	AC016831.1
ENSG00000226445	1.69384	2.46162e-06	5.31176e-05	112.587	119.351	28.8927	24.6066	37.7716	150.526	146.676	74.4889	BX322234.1
ENSG00000226696	1.57053	3.4747e-07	9.69009e-06	61.7412	70.7264	18.3863	14.978	22.3832	71.7351	58.4109	34.4856	LENG8-AS1
ENSG00000226800	1.44848	0.00579297	0.0349072	15.4353	19.1551	12.2575	11.7684	11.1916	56.4473	50.6228	16.5531	CACTIN-AS1
ENSG00000226806	-1.77665	1.19208e-07	3.79493e-06	17.2512	33.8897	70.9185	70.6104	75.5432	12.9358	18.1723	71.7301	AC011893.1
ENSG00000226824	1.49024	0.0064171	0.0377508	22.699	33.8897	12.2575	10.6985	14.689	68.2071	79.1793	35.865	AC006001.2
ENSG00000226926	-2.6631	8.16055e-10	4.20735e-08	9.98755	9.57753	35.0215	53.4927	59.4553	2.35197	7.78812	45.521	PDZPH1P
ENSG00000226953	2.81237	1.33633e-06	3.13543e-05	19.9751	25.0489	4.37768	1.06985	4.19684	19.9918	18.1723	1.37942	AC010890.1
ENSG00000227036	-1.49612	0.00341845	0.0231132	2.72388	11.051	23.6395	33.1655	35.6732	10.5839	20.7683	31.7268	LINC00511
ENSG00000227234	-1.62048	0.0030134	0.0210766	130.746	276.275	559.468	594.839	586.859	34.1036	354.36	704.886	SPANXB1
ENSG00000227372	4.18591	3.02722e-19	7.62433e-17	84.4402	60.4121	6.12876	5.34927	2.7979	117.599	68.7951	4.13827	TP73-AS1
ENSG00000227782	1.31574	0.00449439	0.0286231	29.0547	38.3101	14.0086	7.48898	9.09316	16.4638	18.1723	11.0354	AC002553.1
ENSG00000227964	1.21154	0.00326016	0.0223144	68.0969	74.4101	19.2618	23.5368	18.8858	75.2631	42.8347	53.7975	LINC01429
ENSG00000228049	2.58107	5.29632e-05	0.000752835	13.6194	25.0489	2.62661	2.13971	5.59579	51.7434	33.7485	11.0354	POLR2J2
ENSG00000228221	-2.04062	5.98951e-11	3.98946e-09	39.9502	61.1489	184.738	173.316	174.169	21.1677	38.9406	139.322	LINC00578
ENSG00000228223	-1.03354	0.00166191	0.0130294	162.525	152.504	223.262	320.956	299.375	95.2548	79.1793	161.393	HCG11
ENSG00000228242	1.14156	0.00694579	0.0399284	73.5447	68.5162	11.382	21.3971	37.7716	44.6874	61.007	42.7621	AC093495.1
ENSG00000228290	3.34525	4.28428e-06	8.73052e-05	19.9751	24.3122	0.875537	0	4.19684	27.0477	11.6822	2.75885	TBX18-AS1
ENSG00000228307	-1.53007	0.00064002	0.00602598	4.5398	7.36733	21.8884	17.1177	25.8805	8.2319	10.3842	20.6914	OR2S1P
ENSG00000228363	1.87807	0.00371403	0.0246872	46.3059	46.4142	0.875537	7.48898	14.689	19.9918	25.9604	15.1737	AC015971.1
ENSG00000228393	1.67496	0.000152661	0.00180274	96.2437	61.1489	21.8884	12.8382	19.5853	36.4555	32.4505	16.5531	LINC01004
ENSG00000228492	1.69879	2.4216e-06	5.25214e-05	58.1094	53.7815	11.382	10.6985	16.0879	35.2796	44.1327	22.0708	RAB11FIP1P1
ENSG00000228549	-1.56632	0.000176414	0.00203614	13.6194	9.57753	50.7811	42.7942	33.5747	22.3437	7.78812	28.9679	BX284668.2
ENSG00000228573	-2.71716	0.00016337	0.00190272	4.5398	1.47347	32.3949	17.1177	10.4921	3.52796	1.29802	11.0354	AL138962.1
ENSG00000228626	-2.10535	0.000372307	0.00386427	5.44776	2.2102	21.8884	9.62868	19.5853	7.05591	2.59604	22.0708	AC245100.3
ENSG00000228695	-4.22698	1.93564e-05	0.000314839	0	1.47347	43.7768	51.353	37.7716	0	6.4901	5.5177	CES1P1
ENSG00000229162	1.19359	0.00912592	0.0493792	21.791	49.3611	17.5107	22.4669	11.1916	24.6957	40.2386	8.27655	AL445471.1
ENSG00000229180	1.46351	0.000990673	0.00858992	112.587	150.294	35.0215	41.7243	46.8647	224.613	197.299	126.907	AC006001.3
ENSG00000229212	-1.62451	0.00185861	0.0143413	8.17163	7.36733	10.5064	37.4449	20.2847	8.2319	6.4901	26.2091	AC044860.1
ENSG00000229292	-3.34245	1.91719e-11	1.45902e-09	5.44776	5.15713	61.2876	77.0295	50.3621	8.2319	2.59604	28.9679	RFPL4AL1
ENSG00000229373	-1.38672	1.32731e-10	8.3574e-09	88.98	89.8815	218.884	310.258	242.717	123.478	111.63	307.612	LINC00452
ENSG00000229431	1.26099	0.0039086	0.0255901	43.582	51.5713	13.1331	10.6985	14.689	32.9276	19.4703	24.8296	AL139289.1
ENSG00000229563	-1.12365	0.00173067	0.0134842	61.7412	78.8305	152.343	132.662	124.506	31.7516	46.7287	70.3506	LINC01204
ENSG00000229619	1.46502	1.30901e-06	3.0758e-05	453.98	480.35	154.094	126.243	155.283	266.949	255.71	91.042	MBNL1-AS1
ENSG00000229647	-1.52479	1.35781e-14	2.08443e-12	108.047	120.824	260.91	283.511	316.862	83.495	80.4773	278.644	MYOSLID
ENSG00000230084	1.25933	0.00307	0.0213483	36.3184	39.7836	14.0086	5.34927	14.689	29.3996	32.4505	24.8296	AC006059.1
ENSG00000230316	1.46913	0.000125858	0.00154863	54.4776	44.9407	26.2661	17.1177	13.29	76.439	33.7485	19.3119	FEZF1-AS1
ENSG00000230373	1.52237	0.000121939	0.0015113	128.93	115.667	34.1459	19.2574	38.4711	51.7434	62.305	33.1062	GOLGA6L5P
ENSG00000230415	1.52943	0.00275294	0.0196088	16.3433	36.8367	11.382	8.55883	9.79263	49.3914	51.9208	24.8296	LINC01786
ENSG00000230596	1.83745	0.000413307	0.00423798	41.7661	58.2019	14.0086	5.34927	10.4921	18.8158	22.0664	9.65597	GPAA1P2
ENSG00000230623	1.5041	4.61597e-06	9.289e-05	72.6367	48.6244	23.6395	24.6066	20.2847	70.5591	44.1327	13.7942	AC104461.1
ENSG00000230630	1.55524	1.15843e-05	0.00020542	1500.86	1398.32	316.944	272.813	484.735	677.368	619.156	353.133	DNM3OS
ENSG00000230647	-2.53374	0.000193683	0.00221103	12.7114	3.68367	54.2833	67.4008	34.9737	8.2319	3.89406	8.27655	AC022816.1
ENSG00000230928	2.98638	1.87579e-06	4.17622e-05	27.2388	20.6285	2.62661	0	5.59579	47.0394	33.7485	8.27655	AL139241.1
ENSG00000231064	1.37933	1.80744e-05	0.0002982	49.9378	55.9917	20.1373	19.2574	16.0879	45.8634	70.0931	31.7268	AC234582.1
ENSG00000231123	3.58509	3.48209e-07	9.69392e-06	33.5945	16.2081	3.50215	0	4.19684	29.3996	27.2584	0	SPATA20P1
ENSG00000231131	-2.88331	4.81664e-23	1.80557e-20	24.5149	21.3653	122.575	132.662	160.879	19.9918	9.08614	150.357	LINC01468
ENSG00000231160	2.2299	0.000629176	0.00594472	34.5024	25.7857	3.50215	1.06985	7.69421	43.5115	45.4307	20.6914	KLF3-AS1
ENSG00000231290	-1.47552	2.70182e-12	2.51738e-10	799.004	611.489	1844.76	2087.28	2137.59	1010.17	720.401	2662.29	APCDD1L-AS1
ENSG00000231389	-2.30997	2.43464e-05	0.000387021	53.5696	22.8387	285.425	355.191	237.122	111.719	18.1723	142.081	HLA-DPA1
ENSG00000231609	1.05965	0.0037836	0.0250361	69.0049	43.4673	16.6352	21.3971	20.2847	38.8075	37.6426	34.4856	AC009501.1
ENSG00000231628	1.86845	6.54333e-05	0.000896108	28.1467	26.5224	4.37768	4.27942	9.09316	25.8717	36.3446	15.1737	AL133406.2
ENSG00000231663	1.24633	0.00347141	0.0234124	22.699	20.6285	7.87983	6.41912	8.39369	22.3437	15.5762	12.4148	AL355472.1
ENSG00000231672	-1.92793	2.39135e-07	6.92033e-06	172.512	124.508	506.06	632.284	530.201	132.886	68.7951	231.743	DIRC3
ENSG00000231721	1.52947	1.89217e-09	8.94424e-08	189.763	204.812	55.1588	44.9339	60.1548	130.534	146.676	74.4889	LINC-PINT
ENSG00000231760	1.13432	0.00387291	0.0254183	43.582	23.5755	21.0129	13.9081	13.29	41.1595	25.9604	12.4148	AL355312.2
ENSG00000232040	-5.11224	4.25767e-17	9.25941e-15	2.72388	1.47347	89.3047	103.776	102.823	5.87993	0	45.521	ZBED9
ENSG00000232284	1.38508	7.11765e-05	0.000957675	63.5571	64.0958	21.0129	12.8382	22.3832	41.1595	37.6426	23.4502	GNG12-AS1
ENSG00000232294	2.79632	0.002333	0.017195	26.3308	17.6816	6.12876	1.06985	2.09842	21.1677	2.59604	0	AL031674.1
ENSG00000232295	1.60314	0.000432759	0.00440103	64.4651	72.1999	9.6309	18.1875	24.4816	28.2236	36.3446	13.7942	AL589935.1
ENSG00000232354	4.16252	2.6274e-05	0.000415614	21.791	11.7877	0	0	0.699474	47.0394	14.2782	5.5177	VIPR1-AS1
ENSG00000232480	-2.00904	1.79774e-07	5.47785e-06	74.4527	54.5183	232.893	313.467	254.608	57.6233	36.3446	97.9391	TGFB2-AS1
ENSG00000232517	2.43587	0.000764173	0.00698678	24.5149	22.102	8.75537	0	3.49737	17.6398	12.9802	1.37942	AC112198.2
ENSG00000232656	1.56952	0.00698015	0.0400687	17.2512	17.6816	2.62661	3.20956	10.4921	15.2878	12.9802	4.13827	IDI2-AS1
ENSG00000232677	-1.14473	5.22538e-12	4.55286e-10	157.985	151.767	300.309	397.986	367.224	158.758	185.617	377.962	LINC00665
ENSG00000232774	-2.43816	3.48671e-08	1.26867e-06	22.699	51.5713	118.197	120.893	178.366	12.9358	14.2782	144.84	AL355916.1
ENSG00000232859	1.63379	0.00193534	0.0148071	18.1592	36.8367	12.2575	3.20956	9.09316	28.2236	15.5762	6.89712	LYRM9
ENSG00000232931	1.18028	0.00404657	0.0263064	434.004	408.15	80.5494	86.6582	192.355	248.133	311.525	260.711	LINC00342
ENSG00000233098	-1.93566	0.000210814	0.00238463	43.582	33.153	137.459	210.761	156.682	56.4473	11.6822	49.6593	CCDC144NL-AS1
ENSG00000233215	1.10973	0.00412946	0.0266999	64.4651	38.3101	28.0172	22.4669	23.7821	96.4308	57.1129	45.521	LINC01687
ENSG00000233231	2.10443	0.00019573	0.00222337	19.0671	19.1551	2.62661	2.13971	3.49737	15.2878	18.1723	9.65597	HNRNPA1P49
ENSG00000233393	-5.38577	2.42421e-06	5.25214e-05	0	0	16.6352	9.62868	29.3779	2.35197	0	28.9679	AP000688.2
ENSG00000233532	-1.4591	0.000632388	0.00596807	19.0671	25.0489	85.8026	101.636	92.3306	19.9918	57.1129	48.2798	LINC00460
ENSG00000233817	-1.16002	0.000638593	0.00601825	19.9751	24.3122	43.7768	69.5405	37.0721	18.8158	20.7683	38.6239	AL162727.1
ENSG00000233836	1.35481	0.00172958	0.0134842	88.072	64.8325	18.3863	43.864	32.8753	75.2631	45.4307	11.0354	AC139769.1
ENSG00000233922	-1.19128	0.000146137	0.00173972	242.425	165.765	496.429	511.39	607.843	406.891	171.339	634.535	LINC01694
ENSG00000233967	2.50018	1.23151e-06	2.91065e-05	46.3059	27.2591	7.00429	3.20956	4.19684	21.1677	23.3644	6.89712	AL359715.1
ENSG00000233970	1.52058	0.0012915	0.0106539	22.699	17.6816	7.87983	7.48898	9.79263	39.9835	16.8743	8.27655	AC092159.3
ENSG00000234068	-3.19815	0.00678032	0.0392431	361.368	7.36733	1372.84	2118.31	1953.63	359.852	7.78812	1313.21	PAGE2
ENSG00000234072	1.0086	0.00394797	0.0258103	157.985	137.032	56.9099	44.9339	72.7453	188.158	127.206	131.045	AC074117.1
ENSG00000234147	-4.66328	1.69709e-06	3.85286e-05	0.907959	1.47347	25.3906	46.0037	18.8858	0	1.29802	6.89712	AL035446.1
ENSG00000234222	1.10378	0.00148509	0.0119571	29.9627	39.0469	12.2575	17.1177	16.7874	27.0477	29.8545	12.4148	LIX1L-AS1
ENSG00000234290	1.40987	0.000325487	0.00345848	49.0298	44.9407	15.7597	8.55883	13.9895	42.3355	27.2584	24.8296	AC116366.1
ENSG00000234459	4.04186	0.000100492	0.00127647	39.0422	20.6285	3.50215	1.06985	0	5.87993	11.6822	0	AC002064.2
ENSG00000234511	-2.67847	8.76848e-09	3.66163e-07	42.6741	11.7877	112.069	169.037	195.153	12.9358	20.7683	88.2831	C5orf58
ENSG00000234690	2.05007	0.000439653	0.00445989	10.8955	15.4714	7.00429	2.13971	4.89632	24.6957	22.0664	2.75885	AC106869.1
ENSG00000234722	-6.87426	1.79559e-10	1.09633e-08	0.907959	0	36.7725	40.6544	34.9737	0	0	30.3473	LINC01287
ENSG00000234948	2.33439	0.00092858	0.00815238	80.8084	25.0489	24.515	7.48898	10.4921	92.9028	27.2584	1.37942	LINC01524
ENSG00000234997	1.74635	3.16299e-05	0.000488823	102.599	61.1489	19.2618	22.4669	20.2847	39.9835	42.8347	11.0354	AC016745.1
ENSG00000235217	-3.09649	2.97309e-14	4.27885e-12	9.07959	2.94693	49.9056	66.3309	69.2479	10.5839	7.78812	64.8329	TSPY26P
ENSG00000235298	1.11749	0.00512183	0.0317412	85.3482	60.4121	29.7682	11.7684	41.269	50.5674	50.6228	30.3473	AL354733.3
ENSG00000235385	-2.45159	0.00121816	0.0101528	90.7959	11.051	452.652	316.677	227.329	83.495	9.08614	66.2124	LINC02154
ENSG00000235448	-1.42547	0.00283869	0.0200688	12.7114	14.7347	36.7725	54.5625	32.8753	11.7599	11.6822	12.4148	LURAP1L-AS1
ENSG00000235703	1.97835	2.27514e-13	2.65746e-11	155.261	136.296	30.6438	21.3971	39.1705	122.302	111.63	42.7621	LINC00894
ENSG00000235706	1.68385	0.00793336	0.0443866	22.699	16.9449	6.12876	2.13971	6.29526	44.6874	16.8743	17.9325	DICER1-AS1
ENSG00000235790	2.20004	8.24543e-08	2.72912e-06	92.6118	130.402	22.764	8.55883	17.4868	89.3749	86.9674	40.0033	AC114488.2
ENSG00000235885	-1.06295	0.00804937	0.0448644	19.9751	22.102	42.0258	58.842	37.0721	28.2236	9.08614	28.9679	LINC01828
ENSG00000236069	-3.52288	6.56291e-08	2.23652e-06	4.5398	14.7347	63.0386	105.916	93.7295	3.52796	1.29802	28.9679	AL136987.1
ENSG00000236279	-5.4238	9.25265e-13	9.62216e-11	0	0	36.7725	71.6802	62.2532	4.70394	2.59604	99.3185	CLEC2L
ENSG00000236296	2.47694	1.58902e-05	0.000268766	17.2512	18.4183	3.50215	5.34927	1.39895	31.7516	22.0664	6.89712	GUSBP5
ENSG00000236383	1.63051	0.000719246	0.00662487	36.3184	39.0469	7.00429	6.41912	13.29	50.5674	41.5367	28.9679	LINC00854
ENSG00000236393	-1.69858	1.45172e-07	4.56147e-06	14.5273	13.2612	40.2747	39.5846	46.1653	10.5839	12.9802	41.3827	AC091806.1
ENSG00000236816	-5.96737	8.73658e-12	7.00622e-10	0.907959	0	62.1631	87.728	75.5432	3.52796	0	26.2091	ANKRD20A7P
ENSG00000236841	1.534	0.00105571	0.00904679	162.525	198.181	21.8884	27.8162	76.2427	89.3749	89.5634	60.6947	AC007750.1
ENSG00000236861	1.72077	0.00323274	0.0221738	19.9751	36.0999	8.75537	6.41912	10.4921	11.7599	24.6624	1.37942	AC006378.1
ENSG00000236871	1.82944	3.90507e-05	0.000582292	147.089	148.083	17.5107	18.1875	65.7505	141.118	106.438	51.0387	LINC00106
ENSG00000237054	1.38465	0.00122259	0.0101758	22.699	21.3653	8.75537	4.27942	9.09316	18.8158	23.3644	11.0354	PRMT5-AS1
ENSG00000237380	1.20052	0.00022325	0.00250505	311.43	240.912	84.0515	87.728	115.413	317.516	275.18	213.811	HOXD-AS2
ENSG00000237491	1.34747	0.00656048	0.0383424	52.6616	48.6244	12.2575	7.48898	17.4868	27.0477	16.8743	20.6914	AL669831.5
ENSG00000237862	-1.68294	0.000177772	0.00204679	9.07959	8.8408	27.1416	54.5625	27.2795	12.9358	10.3842	22.0708	Z94160.1
ENSG00000237973	1.07522	0.00529759	0.0326671	935.198	811.88	299.434	283.511	431.575	1144.23	1165.62	913.179	MTCO1P12
ENSG00000238105	1.27137	0.000569395	0.00550245	32.6865	35.3632	17.5107	18.1875	9.79263	52.9193	38.9406	22.0708	GOLGA2P5
ENSG00000238178	-1.58386	5.98747e-09	2.59441e-07	52.6616	76.6203	250.403	166.897	170.672	45.8634	71.3911	151.737	AC078993.1
ENSG00000238832	1.84634	0.00236614	0.017352	19.0671	17.6816	1.75107	11.7684	6.29526	19.9918	20.7683	1.37942	RF01233
ENSG00000239521	1.55645	1.37191e-13	1.70106e-11	217.91	214.389	90.1803	65.2611	60.1548	235.197	240.134	95.1803	CASTOR3
ENSG00000239569	1.05343	0.00468668	0.0295424	31.7786	26.5224	21.0129	17.1177	18.1863	56.4473	51.9208	23.4502	KMT2E-AS1
ENSG00000239653	1.5176	0.000240371	0.00267394	82.6243	98.7223	13.1331	22.4669	33.5747	42.3355	51.9208	27.5885	PSMD6-AS2
ENSG00000239763	2.19335	0.000779457	0.00710236	20.8831	28.7326	4.37768	3.20956	1.39895	24.6957	10.3842	11.0354	AC009120.1
ENSG00000239887	-2.66946	3.50447e-07	9.73941e-06	6.35571	6.6306	29.7682	37.4449	44.7663	14.1118	3.89406	85.5243	C1orf226
ENSG00000240038	1.89735	1.756e-10	1.08034e-08	79.9004	67.0427	20.1373	14.978	16.7874	76.439	53.2188	23.4502	AMY2B
ENSG00000240476	-1.84956	5.0881e-07	1.34451e-05	172.512	218.81	517.442	630.144	696.676	69.3831	145.378	344.856	LINC00973
ENSG00000240498	1.26972	0.00705958	0.0403273	113.495	117.141	32.3949	28.8861	49.6626	65.8552	28.5565	23.4502	CDKN2B-AS1
ENSG00000240694	-2.19793	4.0787e-11	2.83382e-09	206.107	314.585	774.85	885.839	1194	101.135	225.856	1042.84	PNMA2
ENSG00000240891	-1.4145	5.18533e-12	4.54252e-10	325.957	365.42	705.683	816.298	963.875	264.597	238.836	706.265	PLCXD2
ENSG00000241014	1.57464	8.12755e-10	4.20735e-08	96.2437	131.875	35.0215	37.4449	28.6784	107.015	89.5634	44.1416	AC114490.1
ENSG00000241404	1.7304	0.00144442	0.0116902	54.4776	65.5693	13.1331	5.34927	30.0774	101.135	84.3713	44.1416	EGFL8
ENSG00000241769	1.24303	0.00338961	0.0229664	32.6865	36.8367	11.382	5.34927	18.8858	34.1036	25.9604	19.3119	LINC00893
ENSG00000241886	3.80056	3.61204e-06	7.53201e-05	30.8706	32.4163	0.875537	0	2.7979	8.2319	18.1723	2.75885	AC112496.1
ENSG00000241975	1.54736	0.00891895	0.0485481	30.8706	29.4693	4.37768	3.20956	18.8858	35.2796	15.5762	11.0354	ELOCP19
ENSG00000242258	2.67934	0.00197634	0.0150338	89.888	55.255	43.7768	2.13971	6.29526	149.35	53.2188	1.37942	LINC00996
ENSG00000242265	-1.26875	1.40309e-12	1.37905e-10	1419.14	1320.23	3017.1	3135.74	3051.8	1096.02	980.006	2404.34	PEG10
ENSG00000242294	1.15916	5.49577e-09	2.40724e-07	165.249	188.604	62.1631	70.6104	79.74	159.934	167.445	95.1803	STAG3L5P
ENSG00000242338	1.21136	0.00673986	0.0390509	77.1765	70.7264	12.2575	21.3971	27.2795	47.0394	28.5565	37.2445	BMS1P4
ENSG00000242588	1.07125	0.00108309	0.00924206	100.783	92.0917	56.0343	20.3272	45.4658	90.5509	68.7951	45.521	AC108010.1
ENSG00000242615	-1.20047	0.00261742	0.0187929	32.6865	30.2061	65.6653	59.9118	72.7453	21.1677	14.2782	28.9679	AC022415.1
ENSG00000242687	1.1407	0.00788841	0.0441811	66.281	65.5693	27.1416	14.978	31.4763	94.0788	81.7753	67.5918	NA
ENSG00000242779	-1.4523	0.000168971	0.00195804	121.667	94.3019	222.386	343.423	246.914	77.615	46.7287	121.389	ZNF702P
ENSG00000242798	1.84175	0.00119765	0.0100129	16.3433	29.4693	2.62661	5.34927	11.1916	37.6315	15.5762	8.27655	AC073842.2
ENSG00000242861	1.7767	1.55034e-05	0.000263607	50.8457	55.9917	5.25322	16.0478	18.8858	38.8075	38.9406	13.7942	AL591895.1
ENSG00000243055	2.87501	0.00012658	0.00155632	43.582	22.8387	1.75107	2.13971	4.89632	10.5839	9.08614	2.75885	GK-AS1
ENSG00000243243	1.22248	9.96576e-05	0.00126786	134.378	109.773	58.661	43.864	48.2637	81.143	88.2654	24.8296	AC073130.2
ENSG00000243302	1.41837	2.74253e-06	5.86297e-05	132.562	114.93	43.7768	33.1655	46.1653	154.054	142.782	82.7655	AC018638.4
ENSG00000243742	-1.94872	6.04931e-07	1.54776e-05	11.8035	13.9979	82.3004	81.3089	61.5537	34.1036	14.2782	56.5564	RPLP0P2
ENSG00000243810	-1.29924	1.73884e-05	0.000289345	16.3433	14.7347	42.0258	42.7942	46.8647	18.8158	20.7683	38.6239	AL121721.1
ENSG00000243926	1.38884	0.00530339	0.0326904	17.2512	19.1551	7.00429	4.27942	5.59579	11.7599	12.9802	6.89712	TIPARP-AS1
ENSG00000243970	1.96025	0.000224094	0.00250845	45.398	41.2571	3.50215	11.7684	10.4921	17.6398	22.0664	6.89712	PPIEL
ENSG00000244151	1.60491	0.000926036	0.00813775	23.6069	38.3101	7.87983	3.20956	14.689	37.6315	28.5565	16.5531	AC010973.2
ENSG00000244218	2.08353	0.00789233	0.0441877	19.9751	41.9938	1.75107	1.06985	5.59579	10.5839	11.6822	12.4148	RN7SL81P
ENSG00000244306	-1.43155	0.00179364	0.0138998	116.219	69.2529	210.129	231.088	211.241	48.2154	35.0466	74.4889	AL589743.1
ENSG00000244560	2.0175	2.65471e-10	1.55604e-08	426.741	446.46	96.309	63.1214	103.522	493.914	463.393	191.74	AC004890.2
ENSG00000244578	1.59127	0.00357543	0.0239536	30.8706	39.7836	4.37768	4.27942	13.29	36.4555	25.9604	23.4502	LINC01391
ENSG00000244649	-4.00511	0.000340245	0.00358928	0	0	35.0215	49.2133	30.7769	8.2319	0	9.65597	LINC02086
ENSG00000244701	1.84352	0.0011086	0.00941492	61.7412	50.0979	15.7597	4.27942	8.39369	15.2878	36.3446	17.9325	AC004918.1
ENSG00000244879	1.39386	0.00083868	0.00751873	1703.33	1979.6	362.472	292.07	780.613	1620.51	1558.92	1178.03	GABPB1-AS1
ENSG00000245149	1.75603	0.000302535	0.00325105	75.3606	72.9366	5.25322	14.978	25.8805	63.5032	70.0931	38.6239	RNF139-AS1
ENSG00000245317	1.18741	0.00113215	0.00954452	40.8582	29.4693	20.1373	11.7684	13.29	30.5756	28.5565	11.0354	AC008393.1
ENSG00000245532	2.28284	2.19329e-09	1.02178e-07	18267.2	17901.1	1960.33	1797.35	3966.72	15226.7	15224.5	5967.39	NEAT1
ENSG00000245573	1.19135	0.00212371	0.0159516	23.6069	39.0469	14.0086	9.62868	13.9895	41.1595	27.2584	20.6914	BDNF-AS
ENSG00000245711	1.89227	0.002261	0.0167778	31.7786	41.9938	3.50215	2.13971	14.689	17.6398	20.7683	9.65597	NADK2-AS1
ENSG00000245849	1.43543	1.86508e-07	5.63796e-06	138.918	159.871	35.897	41.7243	62.9526	152.878	122.014	73.1095	RAD51-AS1
ENSG00000246090	1.08457	0.00770106	0.0432973	111.679	95.7753	35.897	21.3971	52.4605	67.0312	40.2386	38.6239	AP002026.1
ENSG00000246308	1.43252	0.00538393	0.033073	17.2512	12.5245	3.50215	4.27942	6.29526	16.4638	12.9802	8.27655	AC116535.1
ENSG00000246451	1.48365	1.70713e-07	5.26141e-06	254.229	247.542	66.5408	58.842	100.025	281.06	205.087	129.666	AL049840.1
ENSG00000246477	1.39112	0.006729	0.0390022	27.2388	27.2591	4.37768	4.27942	16.0879	23.5197	29.8545	16.5531	AF131216.1
ENSG00000246705	1.04571	6.78302e-06	0.000129544	734.539	744.837	495.554	434.361	374.219	1138.35	1159.13	525.561	H2AFJ
ENSG00000246859	2.14279	3.57712e-14	5.01388e-12	1519.02	1388.74	230.266	196.853	365.825	966.66	848.906	275.885	STARD4-AS1
ENSG00000246922	1.34698	0.00211998	0.015931	85.3482	85.4611	26.2661	11.7684	39.87	109.367	66.1991	59.3152	UBAP1L
ENSG00000246985	1.20658	6.92773e-06	0.000132152	69.9129	62.6223	35.897	29.9559	22.3832	82.319	68.7951	35.865	SOCS2-AS1
ENSG00000247134	-3.88332	9.46495e-07	2.3081e-05	5.44776	0	39.3992	51.353	29.3779	2.35197	1.29802	12.4148	AC090204.1
ENSG00000247157	1.1402	3.49477e-05	0.000530435	69.9129	78.0937	38.5236	22.4669	33.5747	67.0312	55.8149	27.5885	LINC01252
ENSG00000247708	2.08665	0.00334063	0.0227397	8.17163	8.8408	2.62661	2.13971	6.29526	19.9918	35.0466	5.5177	STX18-AS1
ENSG00000247982	1.57436	0.000257997	0.00282724	31.7786	41.9938	9.6309	9.62868	13.29	55.2713	49.3248	28.9679	LINC00926
ENSG00000248019	1.39807	0.00162902	0.0128464	87.1641	91.3549	11.382	26.7463	33.5747	45.8634	38.9406	28.9679	FAM13A-AS1
ENSG00000248124	-4.84821	4.56929e-13	5.07948e-11	1.81592	0.736733	28.0172	53.4927	55.9579	2.35197	2.59604	64.8329	RRN3P1
ENSG00000248187	-1.95645	0.000185077	0.00212029	10.8955	16.9449	57.7854	47.0736	53.8595	7.05591	9.08614	13.7942	AC078850.1
ENSG00000248215	-1.61436	1.70848e-09	8.14761e-08	24.5149	26.5224	64.7897	66.3309	85.3358	18.8158	24.6624	74.4889	LINC02505
ENSG00000248254	2.39441	0.000926408	0.00813775	54.4776	53.7815	2.62661	7.48898	5.59579	10.5839	10.3842	9.65597	AC107398.2
ENSG00000248458	3.25968	5.21431e-07	1.36666e-05	21.791	23.5755	1.75107	1.06985	3.49737	15.2878	18.1723	1.37942	AL139147.1
ENSG00000248587	1.27104	2.64013e-05	0.000416401	73.5447	94.3019	51.6567	42.7942	31.4763	84.6709	111.63	23.4502	GDNF-AS1
ENSG00000248592	1.59103	0.00395025	0.0258103	14.5273	11.7877	3.50215	8.55883	6.99474	24.6957	16.8743	2.75885	TMEM110-MUSTN1
ENSG00000248713	-1.26859	0.00129937	0.0107133	19.9751	21.3653	42.9013	28.8861	56.6574	8.2319	19.4703	38.6239	AC083902.2
ENSG00000248734	1.23833	0.00536131	0.0329717	59.0173	61.1489	21.8884	21.3971	15.3884	24.6957	24.6624	13.7942	AC008906.1
ENSG00000248858	1.61567	0.00470604	0.0296315	14.5273	19.1551	5.25322	7.48898	2.7979	8.2319	16.8743	4.13827	AC104211.1
ENSG00000249087	1.34234	0.000106615	0.00134259	71.7288	62.6223	24.515	38.5147	22.3832	105.839	97.3516	49.6593	ZNF436-AS1
ENSG00000249242	-2.24443	1.10568e-05	0.00019715	9.98755	5.15713	35.897	62.0515	68.5484	27.0477	9.08614	71.7301	TMEM150C
ENSG00000249306	-1.12587	1.13108e-07	3.61745e-06	108.955	152.504	260.034	313.467	258.805	94.0788	144.08	260.711	LINC01411
ENSG00000249669	2.22531	1.42135e-09	6.96374e-08	320.51	321.952	56.9099	38.5147	92.3306	439.819	415.367	133.804	CARMN
ENSG00000249751	-2.27772	0.00275722	0.0196306	2.72388	9.57753	11.382	40.6544	18.1863	0	5.19208	17.9325	ECSCR
ENSG00000249790	2.2372	0.000618711	0.00585613	61.7412	31.6795	32.3949	9.62868	3.49737	99.9588	55.8149	6.89712	AC092490.1
ENSG00000249835	4.3354	1.46896e-08	5.86095e-07	81.7163	83.2509	7.00429	0	2.09842	31.7516	23.3644	1.37942	VCAN-AS1
ENSG00000249846	-1.59523	5.96614e-05	0.000831186	18.1592	16.2081	35.0215	44.9339	53.16	10.5839	7.78812	28.9679	LINC02021
ENSG00000249867	-2.38877	0.000380845	0.00393768	9.98755	8.10407	27.1416	39.5846	30.7769	2.35197	0	15.1737	AC090833.1
ENSG00000249948	-2.85759	6.41666e-07	1.62882e-05	32.6865	21.3653	261.785	208.622	170.672	34.1036	6.4901	46.9004	GBA3
ENSG00000249992	2.49856	5.16504e-09	2.27474e-07	7707.67	8443.7	3017.1	3527.31	2262.8	21863.9	28570.7	2975.42	TMEM158
ENSG00000250038	-6.00797	1.43843e-06	3.31703e-05	0.907959	0.736733	34.1459	47.0736	41.269	0	0	2.75885	AC109588.1
ENSG00000250151	1.03361	0.00164569	0.01294	46.3059	30.9428	19.2618	17.1177	14.689	35.2796	32.4505	20.6914	ARPC4-TTLL3
ENSG00000250318	1.45141	0.00297791	0.0209154	25.4229	13.9979	14.0086	6.41912	9.79263	27.0477	35.0466	5.5177	AC003072.1
ENSG00000250546	1.23771	0.00775784	0.0435558	39.0422	41.2571	14.8841	19.2574	10.4921	22.3437	18.1723	6.89712	AC079160.1
ENSG00000250548	-1.26257	0.00685244	0.0395469	19.9751	9.57753	28.8927	23.5368	36.3726	10.5839	5.19208	20.6914	LINC01303
ENSG00000250602	1.95354	0.00104029	0.00893837	36.3184	45.6775	13.1331	2.13971	6.29526	24.6957	12.9802	9.65597	AC093535.1
ENSG00000250748	-1.11134	0.00360993	0.0241046	155.261	190.814	293.305	341.283	293.08	83.495	71.3911	158.634	AC025419.1
ENSG00000250920	-1.09733	1.85522e-05	0.000304835	73.5447	79.5672	126.077	157.269	141.993	41.1595	58.4109	120.01	AC105460.1
ENSG00000250961	1.52155	0.00112261	0.00948395	32.6865	19.8918	14.0086	6.41912	6.29526	18.8158	25.9604	6.89712	AC025470.2
ENSG00000250979	3.71482	8.08738e-07	2.00246e-05	30.8706	27.2591	3.50215	1.06985	0.699474	15.2878	12.9802	1.37942	AC022905.1
ENSG00000251143	1.11119	0.000399784	0.00410977	45.398	48.6244	20.1373	16.0478	24.4816	56.4473	33.7485	24.8296	AP002490.1
ENSG00000251320	-1.81487	0.000426526	0.00434587	12.7114	13.9979	16.6352	35.3052	41.9684	3.52796	7.78812	44.1416	AC011352.3
ENSG00000251442	-1.51845	0.000712968	0.00657952	5.44776	8.8408	14.8841	25.6765	27.979	8.2319	10.3842	24.8296	LINC01094
ENSG00000251661	1.30757	0.00190692	0.014637	40.8582	28.7326	21.0129	7.48898	12.5905	37.6315	23.3644	11.0354	AC136475.1
ENSG00000253276	1.00021	6.13002e-07	1.56345e-05	2041.09	2213.88	1351.83	959.659	827.478	1734.58	2105.39	907.661	CCDC71L
ENSG00000253503	7.06109	1.06157e-09	5.31412e-08	34.5024	24.3122	0	0	0	24.6957	11.6822	0	AC060765.1
ENSG00000253522	2.36165	3.39095e-10	1.9246e-08	723.643	674.848	132.206	164.757	98.6258	470.394	410.175	46.9004	MIR3142HG
ENSG00000253537	-1.2897	1.78121e-06	4.01871e-05	46.3059	78.0937	107.691	161.548	144.092	43.5115	59.709	147.598	PCDHGA7
ENSG00000253616	-2.25959	9.07041e-10	4.64146e-08	7.26367	8.8408	39.3992	40.6544	44.0669	9.40788	7.78812	34.4856	AC107959.3
ENSG00000253661	-1.81755	3.78196e-05	0.000565504	13.6194	40.5203	53.4077	72.7501	84.6363	11.7599	22.0664	104.836	ZFHX4-AS1
ENSG00000253669	-1.51203	6.3471e-09	2.72098e-07	35.4104	25.7857	99.8112	85.5883	87.4342	32.9276	25.9604	67.5918	GASAL1
ENSG00000253746	-1.01014	0.000409211	0.00420132	71.7288	72.9366	146.215	93.0773	130.102	39.9835	49.3248	104.836	AC091182.2
ENSG00000253898	7.63464	2.77733e-57	8.95355e-54	2037.46	1038.06	4.37768	5.34927	6.29526	1861.58	732.084	13.7942	LINC01419
ENSG00000254064	1.1808	0.00205075	0.0154829	26.3308	25.7857	9.6309	8.55883	10.4921	25.8717	24.6624	17.9325	AC105206.2
ENSG00000254066	-6.28741	1.86253e-06	4.16395e-05	0	0	196.12	44.9339	13.9895	1.17599	2.59604	4.13827	LINC01938
ENSG00000254221	1.46227	0.00235579	0.0173156	34.5024	31.6795	17.5107	9.62868	5.59579	16.4638	29.8545	8.27655	PCDHGB1
ENSG00000254237	-7.46293	5.02904e-11	3.40601e-09	0	0	55.1588	67.4008	70.6469	1.17599	0	20.6914	AC021242.2
ENSG00000254300	-3.21493	1.8407e-08	7.20152e-07	5.44776	0.736733	37.6481	42.7942	44.7663	2.35197	9.08614	27.5885	LINC01111
ENSG00000254339	-8.13222	6.17289e-12	5.26459e-10	0	0	99.8112	44.9339	41.269	0	0	20.6914	AC064802.1
ENSG00000254401	-3.17534	3.793e-06	7.85853e-05	0.907959	1.47347	42.0258	33.1655	43.3674	3.52796	10.3842	16.5531	AC111188.1
ENSG00000254403	-1.69459	0.000501351	0.00495784	23.6069	33.8897	70.9185	110.195	72.0458	16.4638	11.6822	27.5885	OR10Y1P
ENSG00000254461	1.32242	0.00057893	0.00557033	46.3059	50.0979	9.6309	14.978	27.2795	36.4555	55.8149	23.4502	AP001107.4
ENSG00000254577	1.95277	0.00463275	0.0293189	16.3433	11.051	0.875537	6.41912	3.49737	29.3996	9.08614	6.89712	AC087276.1
ENSG00000254750	2.41496	2.15986e-05	0.000349546	24.5149	24.3122	7.00429	1.06985	4.19684	27.0477	12.9802	4.13827	CASP1P2
ENSG00000254768	-6.49821	1.03065e-09	5.19159e-08	0	0	62.1631	44.9339	48.2637	0	2.59604	24.8296	AC104009.1
ENSG00000254860	1.03983	0.000586749	0.0056263	89.888	67.7795	45.5279	22.4669	50.3621	98.7828	80.4773	44.1416	TMEM9B-AS1
ENSG00000255031	1.32006	8.5896e-06	0.000158598	136.194	105.353	36.7725	42.7942	41.269	141.118	107.736	78.6272	AP002807.1
ENSG00000255036	1.40366	0.00462712	0.0292948	18.1592	16.2081	6.12876	3.20956	6.99474	14.1118	12.9802	6.89712	AL512590.3
ENSG00000255142	1.89473	0.00186598	0.0143912	29.0547	19.8918	11.382	3.20956	1.39895	21.1677	27.2584	11.0354	AP006621.2
ENSG00000255284	1.28505	0.00501484	0.0312222	65.3731	106.09	37.6481	26.7463	32.1758	144.646	146.676	95.1803	AP006621.3
ENSG00000255354	1.37876	0.00254921	0.0183993	69.9129	46.4142	8.75537	14.978	22.3832	45.8634	61.007	41.3827	NA
ENSG00000255364	3.50553	1.8846e-06	4.19005e-05	187.948	228.387	30.6438	5.34927	6.99474	51.7434	58.4109	2.75885	SMILR
ENSG00000255375	-2.49867	4.20042e-07	1.13411e-05	9.07959	4.4204	46.4034	59.9118	37.0721	5.87993	10.3842	20.6914	AL078612.2
ENSG00000255399	-1.68734	0.0012776	0.0105605	5.44776	3.68367	21.8884	23.5368	18.8858	7.05591	7.78812	9.65597	TBX5-AS1
ENSG00000255400	1.8063	0.000334197	0.00353472	27.2388	17.6816	6.12876	7.48898	5.59579	18.8158	14.2782	2.75885	AC124276.2
ENSG00000255518	1.90134	2.72416e-10	1.58522e-08	67.189	58.2019	14.8841	11.7684	17.4868	67.0312	61.007	24.8296	NA
ENSG00000255585	1.51163	0.000870852	0.00774256	27.2388	22.102	6.12876	7.48898	6.99474	19.9918	32.4505	16.5531	AL590627.1
ENSG00000255837	2.23304	6.88472e-05	0.000932519	48.1218	26.5224	7.87983	6.41912	7.69421	22.3437	16.8743	1.37942	TAS2R20
ENSG00000256087	-1.12706	4.60524e-06	9.27899e-05	345.024	324.163	517.442	687.916	678.49	217.557	202.491	500.731	ZNF432
ENSG00000256250	1.19428	0.00551343	0.0336448	49.0298	41.2571	15.7597	13.9081	16.0879	17.6398	24.6624	12.4148	AC073912.1
ENSG00000256771	-1.05045	0.00641471	0.0377508	60.8333	44.204	105.94	86.6582	95.8279	34.1036	22.0664	46.9004	ZNF253
ENSG00000256967	1.53245	1.0751e-05	0.000192336	41.7661	77.357	21.0129	16.0478	19.5853	61.1512	75.2852	33.1062	AC018653.3
ENSG00000256973	1.59286	0.00702643	0.0402324	67.189	101.669	9.6309	6.41912	40.5695	39.9835	41.5367	26.2091	AC053513.1
ENSG00000257151	1.25097	0.00539522	0.0331246	114.403	131.139	32.3949	37.4449	53.8595	54.0953	45.4307	20.6914	PWAR6
ENSG00000257219	-1.89007	3.9545e-13	4.45752e-11	52.6616	78.8305	231.142	283.511	256.007	71.7351	49.3248	168.29	LINC02407
ENSG00000257298	2.18442	0.00568912	0.0343714	15.4353	23.5755	1.75107	0	6.29526	38.8075	18.1723	13.7942	AC008147.2
ENSG00000257335	-1.33065	0.00116571	0.00978139	103.507	83.9876	289.803	387.287	223.832	139.942	71.3911	100.698	MGAM
ENSG00000257354	2.03634	7.30544e-06	0.00013805	283.283	352.895	45.5279	21.3971	81.139	161.11	175.233	89.6626	AC048341.1
ENSG00000257497	1.15808	0.00173397	0.0134958	41.7661	30.9428	8.75537	13.9081	19.5853	32.9276	33.7485	20.6914	AC121761.1
ENSG00000258297	1.19002	0.000989362	0.00858317	295.995	240.175	92.8069	80.239	99.3253	122.302	114.226	66.2124	AP001157.1
ENSG00000258302	1.9821	0.000362634	0.00378582	34.5024	34.6265	7.00429	2.13971	9.79263	27.0477	11.6822	8.27655	AC025034.1
ENSG00000258376	1.24344	0.00086304	0.00769007	55.3855	47.8877	22.764	18.1875	30.0774	88.1989	83.0733	45.521	AC004846.1
ENSG00000258393	-1.86244	0.000794139	0.00719951	23.6069	41.9938	170.73	128.382	72.0458	12.9358	31.1525	28.9679	AL049833.1
ENSG00000258424	1.97077	0.00368639	0.0245402	37.2263	23.5755	2.62661	9.62868	3.49737	10.5839	9.08614	5.5177	AL512791.1
ENSG00000258461	2.05859	3.77735e-06	7.83618e-05	31.7786	34.6265	4.37768	11.7684	5.59579	44.6874	35.0466	15.1737	AC012651.1
ENSG00000258515	1.39082	0.00520157	0.0321488	17.2512	33.8897	6.12876	9.62868	6.29526	16.4638	15.5762	11.0354	AL355075.2
ENSG00000258559	1.36292	0.0022237	0.016556	37.2263	35.3632	13.1331	16.0478	10.4921	27.0477	16.8743	5.5177	AC005519.1
ENSG00000258791	-2.41556	0.000100911	0.00128077	9.07959	0.736733	28.8927	43.864	32.8753	10.5839	3.89406	20.6914	LINC00520
ENSG00000259153	-2.77112	0.00658932	0.0384831	0	0	14.8841	11.7684	20.2847	9.40788	1.29802	22.0708	AC004816.1
ENSG00000259244	1.50827	0.000479561	0.00480725	26.3308	30.9428	7.00429	5.34927	9.79263	27.0477	22.0664	16.5531	AC048382.2
ENSG00000259275	1.07442	0.0014462	0.0116907	76.2686	88.408	27.1416	24.6066	30.0774	52.9193	48.0268	46.9004	AC087477.2
ENSG00000259298	1.95527	0.00671827	0.0389819	29.9627	27.9959	2.62661	4.27942	9.79263	14.1118	5.19208	2.75885	AC012170.2
ENSG00000259392	1.89928	0.000894795	0.00788584	13.6194	17.6816	7.87983	3.20956	2.09842	14.1118	23.3644	5.5177	AC090877.1
ENSG00000259450	-1.35335	1.70112e-05	0.000284738	39.0422	52.3081	96.309	101.636	104.222	23.5197	28.5565	68.9712	NA
ENSG00000259488	1.51356	0.00256624	0.0184996	21.791	31.6795	4.37768	6.41912	15.3884	38.8075	36.3446	19.3119	AC023355.1
ENSG00000259498	1.43503	0.00712226	0.0406385	119.851	120.088	25.3906	33.1655	49.6626	239.901	192.107	142.081	TPM1-AS
ENSG00000259658	2.2018	2.82714e-08	1.05978e-06	48.1218	61.1489	4.37768	12.8382	16.0879	61.1512	45.4307	13.7942	AC027559.1
ENSG00000259727	-2.09097	3.73822e-07	1.02477e-05	21.791	17.6816	89.3047	130.522	71.3463	28.2236	11.6822	46.9004	AC103740.2
ENSG00000259807	2.34783	8.23329e-05	0.00107721	43.582	42.7305	10.5064	4.27942	2.09842	41.1595	62.305	22.0708	AC009093.1
ENSG00000259884	4.53275	2.11993e-09	9.90466e-08	59.0173	45.6775	0	1.06985	2.09842	34.1036	16.8743	4.13827	AC025259.3
ENSG00000259946	1.54398	0.00134253	0.0109961	50.8457	64.8325	13.1331	8.55883	20.9842	24.6957	24.6624	13.7942	BX005019.1
ENSG00000259972	1.17349	0.000121892	0.0015113	112.587	128.928	32.3949	37.4449	53.8595	77.615	75.2852	52.4181	AC009120.2
ENSG00000260062	-3.36223	3.23505e-05	0.000498049	1.81592	0	30.6438	51.353	84.6363	11.7599	12.9802	95.1803	GOLGA2P11
ENSG00000260097	2.1656	8.1493e-05	0.00106883	28.1467	36.8367	5.25322	8.55883	10.4921	78.791	71.3911	24.8296	SPDYE6
ENSG00000260157	1.44731	0.00545004	0.0333774	64.4651	67.0427	32.3949	28.8861	11.1916	48.2154	33.7485	5.5177	AC233702.1
ENSG00000260261	1.70016	3.73448e-07	1.02477e-05	48.1218	47.1509	14.8841	7.48898	15.3884	45.8634	42.8347	19.3119	AC124944.3
ENSG00000260517	1.96512	0.000140437	0.00168305	23.6069	36.8367	9.6309	4.27942	3.49737	18.8158	32.4505	12.4148	AC009093.2
ENSG00000260552	1.26157	7.52083e-06	0.000141127	80.8084	78.8305	39.3992	36.375	35.6732	109.367	128.504	55.177	AC023043.1
ENSG00000260645	2.11346	3.57823e-05	0.000541572	45.398	39.7836	6.12876	7.48898	10.4921	19.9918	19.4703	4.13827	AL359715.2
ENSG00000260751	1.98992	0.00642217	0.0377531	44.49	46.4142	3.50215	2.13971	5.59579	31.7516	14.2782	24.8296	AC008870.2
ENSG00000260757	2.06501	0.000741795	0.00680535	25.4229	12.5245	3.50215	1.06985	5.59579	21.1677	11.6822	6.89712	AC093520.1
ENSG00000260774	2.84511	6.69426e-05	0.0009129	24.5149	26.5224	0.875537	1.06985	2.09842	23.5197	32.4505	12.4148	AC021087.3
ENSG00000260793	1.25246	0.00278882	0.019777	47.2139	27.9959	14.0086	14.978	20.2847	57.6233	64.901	34.4856	AC003102.1
ENSG00000260822	-2.00488	2.71795e-07	7.75408e-06	100.783	96.5121	280.172	380.868	342.742	57.6233	35.0466	166.91	AC004656.1
ENSG00000260877	1.48623	6.32277e-09	2.71778e-07	225.174	225.44	56.0343	59.9118	83.2374	165.814	225.856	103.457	AP005233.2
ENSG00000260924	1.45743	0.00711505	0.0406117	16.3433	17.6816	2.62661	6.41912	7.69421	21.1677	29.8545	15.1737	LINC01311
ENSG00000260977	2.01094	3.08466e-08	1.14566e-06	88.98	87.6713	27.1416	16.0478	15.3884	111.719	49.3248	26.2091	AC016722.3
ENSG00000261051	1.27246	0.000930129	0.0081571	101.691	131.875	29.7682	44.9339	44.7663	54.0953	61.007	24.8296	AC107021.2
ENSG00000261220	1.89668	2.04516e-07	6.08227e-06	46.3059	47.1509	6.12876	12.8382	11.8911	38.8075	38.9406	16.5531	AC103706.1
ENSG00000261270	1.45557	0.0035028	0.0235355	36.3184	24.3122	6.12876	13.9081	12.5905	54.0953	50.6228	28.9679	AC012181.2
ENSG00000261296	-5.89535	1.94189e-08	7.56072e-07	0	0	24.515	23.5368	37.7716	1.17599	1.29802	33.1062	AC126323.6
ENSG00000261326	2.02052	0.000327268	0.00347283	321.418	285.852	22.764	19.2574	81.8384	152.878	109.034	91.042	LINC01355
ENSG00000261366	2.20872	0.000559315	0.00542455	34.5024	36.8367	6.12876	5.34927	3.49737	11.7599	9.08614	5.5177	MANEA-AS1
ENSG00000261371	1.32435	0.00254188	0.0183733	75.3606	81.0407	53.4077	36.375	26.58	76.439	83.0733	8.27655	PECAM1
ENSG00000261379	1.57805	5.47907e-05	0.000772678	211.554	293.22	63.0386	34.2353	86.7348	114.071	216.769	96.5597	AC010735.1
ENSG00000261468	1.43078	0.00095892	0.00836861	41.7661	61.8856	17.5107	13.9081	10.4921	21.1677	36.3446	19.3119	AC096921.2
ENSG00000261526	1.31919	0.00294173	0.0206993	37.2263	28.7326	6.12876	12.8382	10.4921	28.2236	36.3446	24.8296	AC012615.1
ENSG00000261934	-1.72858	0.000708556	0.00655167	5.44776	3.68367	14.8841	21.3971	24.4816	9.40788	5.19208	15.1737	PCDHGA9
ENSG00000261997	1.75143	0.00900821	0.0489069	70.8208	69.9897	3.50215	4.27942	23.0826	41.1595	35.0466	34.4856	AC007336.1
ENSG00000262209	1.50955	6.03151e-05	0.00083812	50.8457	39.0469	14.8841	20.3272	18.1863	87.0229	44.1327	24.8296	PCDHGB3
ENSG00000262903	1.58101	8.13204e-05	0.0010683	65.3731	76.6203	14.0086	23.5368	18.8858	85.8469	85.6694	51.0387	AC027796.4
ENSG00000263069	1.14232	0.00404902	0.0263064	35.4104	48.6244	17.5107	10.6985	23.7821	61.1512	46.7287	35.865	AC124319.2
ENSG00000263272	1.26949	0.00112067	0.00948395	129.838	109.037	21.0129	28.8861	54.559	74.0871	79.1793	59.3152	AC004148.2
ENSG00000263874	1.73757	0.000579185	0.00557033	95.3357	69.9897	9.6309	8.55883	30.0774	71.7351	45.4307	37.2445	LINC00672
ENSG00000264235	1.74663	0.000316423	0.00337552	29.0547	21.3653	4.37768	6.41912	11.1916	21.1677	19.4703	4.13827	AP005329.1
ENSG00000264451	-3.28948	0.000355964	0.0037276	1.81592	0	21.8884	26.7463	20.9842	2.35197	3.89406	2.75885	AC036222.1
ENSG00000265107	-2.43647	5.05419e-06	0.00010062	4.5398	11.051	21.8884	28.8861	45.4658	5.87993	9.08614	71.7301	GJA5
ENSG00000265194	1.37828	0.000586454	0.0056263	57.2014	49.3611	13.1331	10.6985	17.4868	31.7516	29.8545	24.8296	AL359922.2
ENSG00000265479	1.05025	0.00224531	0.0166784	40.8582	32.4163	23.6395	11.7684	15.3884	30.5756	38.9406	17.9325	DTX2P1-UPK3BP1-PMS2P11
ENSG00000265489	1.99221	0.00026426	0.00288591	29.0547	22.102	3.50215	6.41912	8.39369	23.5197	11.6822	2.75885	AC005358.2
ENSG00000265717	1.88702	0.00846876	0.0467013	61.7412	33.153	23.6395	12.8382	4.89632	50.5674	14.2782	1.37942	AC103808.3
ENSG00000266053	1.01277	0.00750228	0.0424378	49.0298	38.3101	19.2618	13.9081	13.29	30.5756	32.4505	30.3473	NDUFV2-AS1
ENSG00000266743	3.49122	8.56276e-05	0.00111579	35.4104	8.10407	4.37768	1.06985	0.699474	34.1036	7.78812	1.37942	AC103808.6
ENSG00000267013	-3.74124	8.52662e-14	1.0908e-11	4.5398	5.15713	105.064	94.1471	72.0458	7.05591	6.4901	33.1062	LINC01929
ENSG00000267123	3.08383	7.03205e-12	5.87304e-10	69.0049	42.7305	11.382	9.62868	4.19684	91.7269	57.1129	5.5177	LINC02081
ENSG00000267193	2.19547	1.01008e-05	0.000181916	54.4776	25.7857	6.12876	10.6985	5.59579	37.6315	19.4703	8.27655	AC023421.2
ENSG00000267199	1.66257	2.68923e-05	0.000422081	94.4278	81.7774	16.6352	11.7684	39.1705	62.3272	68.7951	28.9679	AP001029.2
ENSG00000267252	1.37694	0.00277808	0.0197268	101.691	75.1468	41.1502	17.1177	38.4711	77.615	36.3446	13.7942	LINC01255
ENSG00000267265	2.85334	1.14505e-05	0.000203721	42.6741	25.7857	4.37768	9.62868	3.49737	44.6874	15.5762	0	AC011476.3
ENSG00000267313	1.39895	3.79875e-08	1.3577e-06	432.189	381.628	152.343	124.103	153.185	322.22	249.22	93.8008	AC021504.1
ENSG00000267368	1.73838	0.000492973	0.00490811	24.5149	16.2081	9.6309	3.20956	4.89632	24.6957	16.8743	6.89712	UPK3BL1
ENSG00000267453	-2.27096	5.21021e-06	0.000103396	3.63184	5.89387	20.1373	35.3052	43.3674	5.87993	12.9802	33.1062	LINC01835
ENSG00000267454	-1.20761	0.00123568	0.0102719	24.5149	25.7857	51.6567	95.217	61.5537	41.1595	18.1723	44.1416	ZNF582-AS1
ENSG00000267508	1.32987	6.19471e-05	0.000855635	133.47	119.351	28.0172	36.375	51.7611	75.2631	70.0931	42.7621	ZNF285
ENSG00000267680	1.00773	4.80074e-07	1.27906e-05	365.908	369.84	151.468	160.478	184.661	288.116	255.71	139.322	ZNF224
ENSG00000267765	1.28064	0.00238969	0.0174771	27.2388	25.0489	7.87983	9.62868	7.69421	17.6398	18.1723	12.4148	AC100793.3
ENSG00000267767	-2.05074	0.00059435	0.0056853	5.44776	3.68367	18.3863	16.0478	13.9895	0	6.4901	16.5531	LINC01801
ENSG00000267858	1.05829	0.000107314	0.00134853	99.8755	67.7795	44.6524	28.8861	44.0669	89.3749	99.9476	53.7975	MZF1-AS1
ENSG00000268030	1.30092	3.2618e-07	9.12794e-06	98.9676	85.4611	28.0172	33.1655	32.8753	71.7351	81.7753	45.521	AC005253.1
ENSG00000268201	2.06524	0.00411611	0.0266242	18.1592	12.5245	1.75107	2.13971	1.39895	18.8158	18.1723	12.4148	AC020915.2
ENSG00000268230	1.11842	0.000729548	0.00670826	44.49	41.2571	19.2618	13.9081	18.1863	51.7434	33.7485	28.9679	AC012313.3
ENSG00000268403	1.48527	0.00115744	0.00973738	21.791	17.6816	7.87983	6.41912	7.69421	35.2796	27.2584	15.1737	AC132192.2
ENSG00000268812	2.20892	0.00800305	0.0446835	14.5273	14.7347	1.75107	2.13971	6.29526	47.0394	68.7951	22.0708	AC004264.1
ENSG00000268849	6.36005	1.65014e-09	7.93989e-08	31.7786	34.6265	1.75107	0	0	59.9753	32.4505	0	SIGLEC22P
ENSG00000269001	-3.12042	3.12434e-06	6.58318e-05	3.63184	0.736733	20.1373	38.5147	30.7769	7.05591	1.29802	16.5531	AC092070.2
ENSG00000269416	1.68651	3.50143e-13	4.00281e-11	159.801	140.716	60.412	37.4449	48.2637	166.99	133.696	38.6239	LINC01224
ENSG00000269586	-7.59624	3.40659e-12	3.05061e-10	1.81592	0	110.318	139.081	100.724	0	0	34.4856	CT45A10
ENSG00000269609	1.11597	0.00111659	0.00946631	63.5571	50.0979	39.3992	20.3272	27.2795	94.0788	50.6228	31.7268	RPARP-AS1
ENSG00000269680	2.14002	0.00234404	0.0172606	23.6069	25.0489	6.12876	3.20956	1.39895	25.8717	5.19208	8.27655	AC008760.1
ENSG00000269737	1.41656	4.24712e-06	8.67672e-05	42.6741	48.6244	12.2575	17.1177	20.9842	50.5674	50.6228	22.0708	AL691432.1
ENSG00000269950	1.34874	0.00560365	0.034012	385.883	442.777	163.725	94.1471	118.911	123.478	149.272	55.177	AP000962.1
ENSG00000270012	1.5436	0.00600007	0.0359402	51.7537	47.1509	4.37768	8.55883	16.0879	51.7434	37.6426	37.2445	AC232271.1
ENSG00000270060	1.68933	0.000706838	0.00654048	22.699	22.8387	2.62661	6.41912	11.8911	32.9276	20.7683	9.65597	AC090589.3
ENSG00000270157	1.35846	0.00169351	0.0132513	57.2014	66.306	26.2661	9.62868	16.0879	29.3996	35.0466	22.0708	AC004918.3
ENSG00000270195	1.93629	0.00623813	0.0370135	15.4353	14.7347	7.00429	2.13971	2.7979	39.9835	40.2386	17.9325	AC016773.1
ENSG00000270392	1.19192	0.00585285	0.0352154	130.746	145.136	23.6395	29.9559	70.6469	71.7351	76.5832	62.0741	PFN1P2
ENSG00000270562	1.39744	0.00786211	0.0440644	52.6616	30.9428	4.37768	10.6985	20.9842	24.6957	23.3644	13.7942	AC097634.1
ENSG00000270589	2.65835	9.31325e-05	0.00120385	23.6069	44.204	4.37768	0	7.69421	23.5197	14.2782	4.13827	AL158163.1
ENSG00000271327	2.19433	0.000651637	0.00612105	21.791	19.8918	0.875537	1.06985	6.99474	18.8158	16.8743	8.27655	AC010201.2
ENSG00000271533	1.47821	0.00659488	0.0385016	187.04	228.387	22.764	37.4449	88.1337	72.9111	59.709	48.2798	Z83843.1
ENSG00000271576	1.33359	0.000703605	0.00651806	51.7537	42.7305	9.6309	12.8382	16.7874	32.9276	29.8545	24.8296	AL359504.2
ENSG00000271584	1.41732	0.000130518	0.00159381	28.1467	40.5203	17.5107	12.8382	16.7874	62.3272	50.6228	20.6914	LINC02550
ENSG00000271590	1.44871	0.000453786	0.00458881	60.8333	64.8325	13.1331	12.8382	19.5853	61.1512	44.1327	41.3827	AC108463.3
ENSG00000271857	1.00585	0.000997116	0.00862722	64.4651	77.357	48.1545	43.864	40.5695	134.062	106.438	57.9358	AL096865.1
ENSG00000271966	2.07932	5.31677e-05	0.00075441	16.3433	21.3653	3.50215	4.27942	4.89632	15.2878	18.1723	4.13827	AC021321.1
ENSG00000272008	1.6263	0.00720301	0.0410556	19.0671	24.3122	7.87983	4.27942	2.09842	27.0477	11.6822	13.7942	AL139274.2
ENSG00000272037	2.37012	9.88003e-05	0.00126194	41.7661	54.5183	0.875537	5.34927	11.8911	29.3996	23.3644	11.0354	AP002907.1
ENSG00000272054	1.17061	0.00213175	0.0159971	59.0173	41.9938	11.382	21.3971	18.1863	30.5756	32.4505	23.4502	AC007390.2
ENSG00000272072	3.41225	0.000104542	0.00132062	23.6069	36.0999	0.875537	1.06985	3.49737	10.5839	5.19208	1.37942	AC004492.1
ENSG00000272145	1.53838	0.00015195	0.00180002	46.3059	44.204	14.0086	11.7684	9.79263	54.0953	28.5565	26.2091	NFYC-AS1
ENSG00000272211	1.94928	0.00504955	0.0313939	16.3433	19.8918	0	5.34927	3.49737	15.2878	10.3842	8.27655	AC114760.2
ENSG00000272316	1.125	0.00204271	0.0154426	236.069	167.238	79.6738	63.1214	79.0405	82.319	110.332	51.0387	AL021368.2
ENSG00000272398	-5.60164	1.26137e-23	5.08302e-21	9.98755	0	182.987	201.133	367.923	7.05591	5.19208	295.197	CD24
ENSG00000272563	2.17581	4.14966e-06	8.49916e-05	40.8582	63.3591	14.0086	4.27942	11.1916	28.2236	35.0466	6.89712	AC016745.2
ENSG00000272622	1.14138	0.0013272	0.0108926	369.539	481.087	110.318	125.173	196.552	166.99	266.094	150.357	AC010735.2
ENSG00000272654	1.13491	0.00158209	0.0125562	55.3855	30.2061	15.7597	21.3971	17.4868	29.3996	46.7287	19.3119	AL358472.2
ENSG00000272760	1.76572	0.00429557	0.0275638	80.8084	66.306	35.0215	11.7684	11.1916	23.5197	42.8347	4.13827	AC093726.1
ENSG00000272836	1.86701	0.00136925	0.0111695	12.7114	20.6285	4.37768	8.55883	1.39895	18.8158	16.8743	5.5177	AL022328.1
ENSG00000272918	2.09915	0.00647741	0.0379808	31.7786	48.6244	8.75537	0	4.19684	11.7599	24.6624	15.1737	AC005070.3
ENSG00000273002	1.83586	0.000179833	0.00206609	27.2388	12.5245	7.00429	5.34927	5.59579	25.8717	23.3644	6.89712	AL355388.2
ENSG00000273007	1.74682	0.00141659	0.0114975	25.4229	25.7857	8.75537	1.06985	9.79263	18.8158	16.8743	5.5177	AC021205.3
ENSG00000273055	1.73456	0.00262183	0.0188162	30.8706	31.6795	1.75107	4.27942	13.9895	24.6957	28.5565	15.1737	AC005046.1
ENSG00000273179	1.69791	1.49213e-06	3.42128e-05	45.398	40.5203	14.8841	9.62868	16.7874	67.0312	51.9208	22.0708	AC092535.4
ENSG00000273230	1.11739	0.00212685	0.0159677	37.2263	53.7815	21.0129	12.8382	25.1811	57.6233	58.4109	37.2445	AC102953.2
ENSG00000273237	-2.17658	0.000251348	0.00276363	2.72388	5.89387	9.6309	19.2574	17.4868	3.52796	2.59604	23.4502	AC004520.1
ENSG00000273295	1.34989	0.00199514	0.0151369	22.699	34.6265	13.1331	5.34927	12.5905	42.3355	27.2584	19.3119	AP000350.6
ENSG00000273329	1.19195	0.000946847	0.0082767	36.3184	55.9917	13.1331	14.978	19.5853	42.3355	36.3446	28.9679	AC078846.1
ENSG00000273344	2.05889	2.98609e-08	1.11161e-06	53.5696	47.8877	13.1331	14.978	9.09316	79.967	63.603	23.4502	PAXIP1-AS1
ENSG00000273373	2.01787	0.000102945	0.00130249	214.278	123.771	14.8841	16.0478	54.559	85.8469	68.7951	35.865	AL355488.1
ENSG00000273449	1.48466	0.00859505	0.0472005	42.6741	32.4163	4.37768	9.62868	15.3884	17.6398	12.9802	8.27655	AC093788.1
ENSG00000273478	1.61854	0.00521294	0.0322068	53.5696	25.7857	7.87983	5.34927	7.69421	27.0477	12.9802	19.3119	AC099676.1
ENSG00000273723	1.3053	0.00368734	0.0245402	23.6069	30.2061	7.87983	14.978	8.39369	14.1118	28.5565	8.27655	AL139089.1
ENSG00000273771	1.22759	0.00137471	0.0112084	91.7039	83.9876	30.6438	27.8162	34.2742	62.3272	31.1525	22.0708	AC024337.2
ENSG00000274012	2.04024	0.00668529	0.0388552	281.467	241.648	116.446	120.893	126.605	1716.94	1805.55	620.741	RN7SL2
ENSG00000274292	1.72915	1.33735e-07	4.22681e-06	43.582	49.3611	12.2575	14.978	10.4921	44.6874	49.3248	20.6914	AC084018.2
ENSG00000274307	-1.53717	1.39967e-05	0.000241039	19.9751	24.3122	35.0215	81.3089	69.2479	24.6957	22.0664	80.0066	AC023449.2
ENSG00000274528	-1.72511	0.00223619	0.0166337	4.5398	7.36733	13.1331	22.4669	17.4868	5.87993	1.29802	12.4148	AC090970.3
ENSG00000274561	1.12263	0.00549058	0.0335746	29.9627	58.2019	14.8841	11.7684	29.3779	42.3355	37.6426	20.6914	AC005332.4
ENSG00000274565	1.35799	0.000695565	0.00646214	106.231	124.508	42.9013	31.0258	58.7558	191.686	183.021	104.836	AC080038.1
ENSG00000274627	1.26677	0.00652412	0.0381992	172.512	168.712	36.7725	26.7463	76.2427	178.75	144.08	137.942	NA
ENSG00000274756	1.55557	0.00880728	0.0481073	9.98755	26.5224	7.00429	3.20956	4.19684	23.5197	23.3644	15.1737	AC243732.1
ENSG00000274879	-2.93401	7.40854e-06	0.000139182	1.81592	1.47347	15.7597	19.2574	28.6784	3.52796	3.89406	12.4148	AC009804.1
ENSG00000275180	2.5568	1.06541e-12	1.08008e-10	81.7163	83.2509	7.00429	8.55883	16.7874	64.6792	70.0931	19.3119	AC048341.2
ENSG00000275216	-3.20127	4.85131e-10	2.6241e-08	21.791	28.7326	362.472	234.298	178.366	22.3437	16.8743	53.7975	AL161431.1
ENSG00000276107	1.75774	3.46313e-09	1.56365e-07	817.163	902.498	166.352	154.059	233.624	445.698	520.506	241.399	AC037198.1
ENSG00000276115	1.40434	0.00116275	0.00976539	19.0671	26.5224	4.37768	9.62868	10.4921	25.8717	24.6624	12.4148	AC026356.2
ENSG00000276166	1.30405	0.00235565	0.0173156	28.1467	24.3122	8.75537	8.55883	10.4921	21.1677	40.2386	19.3119	AC092118.2
ENSG00000276547	-3.62279	8.61621e-25	4.96017e-22	19.9751	47.8877	301.185	493.203	493.829	27.0477	54.5169	549.011	PCDHGB5
ENSG00000276600	-2.58925	0.000107337	0.00134853	0	4.4204	16.6352	11.7684	18.8858	4.70394	2.59604	23.4502	RAB7B
ENSG00000276953	1.51536	2.61431e-07	7.48491e-06	88.072	63.3591	35.0215	29.9559	18.8858	78.791	72.6892	22.0708	TRBV12-4
ENSG00000277072	1.15185	0.00301393	0.0210766	124.39	122.298	49.9056	34.2353	69.2479	209.325	136.292	114.492	STAG3L2
ENSG00000277135	1.23068	0.00227589	0.0168484	31.7786	30.2061	7.87983	8.55883	15.3884	29.3996	20.7683	16.5531	AC012409.3
ENSG00000277147	-3.01049	6.39045e-12	5.39308e-10	10.8955	19.1551	141.837	194.713	127.304	19.9918	14.2782	53.7975	LINC00869
ENSG00000277586	-1.59758	8.09338e-05	0.00106409	400.41	207.022	1141.7	1576.96	1081.39	491.562	303.737	441.416	NEFL
ENSG00000277687	1.51006	0.00314267	0.0216852	34.5024	39.7836	6.12876	7.48898	15.3884	14.1118	22.0664	9.65597	AL139407.1
ENSG00000278030	2.25162	0.000563611	0.00545636	24.5149	27.9959	7.87983	4.27942	1.39895	8.2319	33.7485	6.89712	TRBV7-9
ENSG00000278384	1.56728	8.80795e-08	2.87982e-06	84.4402	62.6223	22.764	26.7463	19.5853	56.4473	57.1129	19.3119	AL354822.1
ENSG00000278500	1.11853	0.000865414	0.00770271	30.8706	33.8897	14.0086	14.978	16.7874	32.9276	27.2584	11.0354	AC009336.2
ENSG00000278600	1.17517	0.00236084	0.0173255	82.6243	89.8815	21.0129	24.6066	27.2795	63.5032	46.7287	55.177	AC015871.3
ENSG00000278621	2.02194	0.000762558	0.00697597	531.156	694.739	36.7725	47.0736	173.47	524.489	667.183	339.338	AC037198.2
ENSG00000278784	1.36434	1.54819e-05	0.000263523	59.9253	53.7815	20.1373	14.978	32.8753	55.2713	67.4971	22.0708	AL136295.7
ENSG00000278875	2.10574	1.73141e-05	0.00028861	39.9502	21.3653	5.25322	4.27942	6.29526	36.4555	24.6624	13.7942	AC025809.2
ENSG00000278888	2.65477	0.00015112	0.00179374	35.4104	23.5755	3.50215	0	5.59579	11.7599	14.2782	4.13827	NA
ENSG00000278959	3.1779	6.81638e-05	0.000925638	23.6069	18.4183	5.25322	1.06985	0	14.1118	12.9802	1.37942	AC006378.2
ENSG00000278989	1.54163	0.00088996	0.00786905	58.1094	58.2019	14.8841	6.41912	20.9842	34.1036	24.6624	17.9325	AP001148.1
ENSG00000279030	1.70522	0.000218771	0.00246207	36.3184	25.0489	7.87983	13.9081	6.29526	49.3914	42.8347	20.6914	AC007336.3
ENSG00000279088	1.25643	6.28052e-06	0.000121677	305.074	271.855	81.4249	90.9376	128.703	297.524	280.372	184.843	AC022400.7
ENSG00000279108	1.23637	0.000819152	0.00737284	51.7537	40.5203	20.1373	10.6985	20.9842	29.3996	35.0466	13.7942	AC008537.3
ENSG00000279196	1.65457	5.37277e-06	0.000106262	61.7412	41.9938	27.1416	14.978	11.1916	65.8552	62.305	20.6914	AC135048.4
ENSG00000279254	1.74733	0.00309133	0.021448	21.791	14.7347	4.37768	8.55883	6.29526	16.4638	14.2782	0	AC020604.1
ENSG00000279265	2.78529	7.41926e-08	2.49148e-06	46.3059	46.4142	1.75107	3.20956	8.39369	43.5115	27.2584	11.0354	AC000123.2
ENSG00000279278	2.21497	0.00402533	0.0262053	45.398	46.4142	0.875537	1.06985	11.8911	34.1036	24.6624	19.3119	AC245060.6
ENSG00000279312	1.76759	1.58622e-06	3.62157e-05	147.089	148.82	21.0129	35.3052	37.7716	77.615	70.0931	37.2445	AL136164.4
ENSG00000279329	1.31246	0.00511746	0.0317263	16.3433	20.6285	5.25322	8.55883	5.59579	23.5197	18.1723	13.7942	AC020910.5
ENSG00000279400	2.46337	1.99838e-08	7.73105e-07	69.0049	57.4652	6.12876	6.41912	15.3884	64.6792	32.4505	12.4148	AC008957.3
ENSG00000279407	1.1787	0.00047684	0.00478592	105.323	67.0427	29.7682	23.5368	35.6732	79.967	49.3248	45.521	AC007191.1
ENSG00000279415	-1.10889	0.00507255	0.0314963	12.7114	29.4693	28.0172	57.7721	48.2637	16.4638	25.9604	49.6593	AC099494.2
ENSG00000279519	1.20369	2.52336e-05	0.000400336	163.433	179.026	58.661	52.4228	72.0458	105.839	97.3516	53.7975	AC007382.1
ENSG00000279520	1.42197	0.00913485	0.0494109	22.699	23.5755	5.25322	2.13971	11.8911	27.0477	24.6624	17.9325	AC093525.8
ENSG00000279611	1.72397	0.00735041	0.0417188	13.6194	10.3143	5.25322	3.20956	4.19684	24.6957	36.3446	13.7942	AC012313.10
ENSG00000279713	1.22512	1.11649e-06	2.67014e-05	123.482	127.455	51.6567	49.2133	65.7505	164.638	168.743	84.1449	AC080038.3
ENSG00000279744	2.47165	0.000208469	0.00235977	29.9627	23.5755	1.75107	0	6.29526	23.5197	18.1723	9.65597	AC132938.5
ENSG00000279759	1.65137	5.84059e-06	0.000114115	59.9253	75.1468	11.382	13.9081	24.4816	63.5032	53.2188	31.7268	AC118344.2
ENSG00000279789	1.57492	0.00633343	0.0374088	55.3855	44.204	3.50215	9.62868	17.4868	52.9193	49.3248	38.6239	AC120114.4
ENSG00000280067	1.57508	0.00159324	0.0126137	34.5024	19.1551	8.75537	2.13971	11.1916	27.0477	25.9604	13.7942	AC023818.1
ENSG00000280069	1.66012	0.00756118	0.0426298	11.8035	19.1551	4.37768	2.13971	9.09316	24.6957	9.08614	4.13827	AC127024.8
ENSG00000280138	1.79245	0.00569729	0.0344079	104.415	131.875	10.5064	8.55883	32.8753	145.822	122.014	95.1803	AC027290.2
ENSG00000280143	1.25511	2.09971e-08	8.07762e-07	201.567	210.706	129.579	84.5185	90.2321	254.013	279.074	89.6626	AP000892.3
ENSG00000280184	2.48885	3.8792e-06	7.99602e-05	21.791	24.3122	3.50215	1.06985	4.89632	27.0477	16.8743	6.89712	AL023806.3
ENSG00000280347	1.39381	0.00505021	0.0313939	183.408	210.706	40.2747	33.1655	70.6469	64.6792	53.2188	51.0387	AC000123.3
ENSG00000280828	1.67182	0.000241839	0.00268525	43.582	38.3101	8.75537	11.7684	8.39369	55.2713	44.1327	30.3473	AC090114.3
ENSG00000281026	2.06623	0.000171239	0.00198291	138.918	136.296	8.75537	13.9081	46.1653	54.0953	64.901	24.8296	N4BP2L2-IT2
ENSG00000281183	1.04645	0.00164297	0.0129249	76.2686	91.3549	25.3906	28.8861	33.5747	57.6233	72.6892	59.3152	NPTN-IT1
ENSG00000281195	2.00314	0.00605445	0.0361987	16.3433	44.204	0	5.34927	9.79263	28.2236	24.6624	13.7942	AC007878.1
ENSG00000281490	1.68488	4.0485e-08	1.4374e-06	204.291	216.6	57.7854	51.353	65.7505	264.597	267.392	124.148	CICP14
ENSG00000281896	2.11497	2.71604e-11	1.93716e-09	53.5696	56.7285	10.5064	9.62868	14.689	59.9753	50.6228	16.5531	AC018638.8
ENSG00000282870	1.20936	1.78216e-05	0.000295239	176.144	190.814	60.412	71.6802	65.7505	118.775	97.3516	55.177	FRG1DP
ENSG00000282943	1.81585	0.00396455	0.0258723	21.791	39.0469	7.00429	1.06985	10.4921	12.9358	16.8743	6.89712	AC004784.1
ENSG00000282995	1.54819	4.05034e-05	0.000600138	63.5571	55.255	20.1373	21.3971	12.5905	49.3914	28.5565	13.7942	FRG1EP
ENSG00000283162	-2.24582	3.36978e-11	2.37194e-09	24.5149	16.9449	84.9271	98.4266	101.424	14.1118	15.5762	53.7975	AL390726.6
ENSG00000283189	1.49381	3.07413e-06	6.49435e-05	40.8582	34.6265	15.7597	14.978	12.5905	47.0394	45.4307	16.5531	AC104452.1
ENSG00000283265	-1.75322	1.85227e-06	4.14677e-05	11.8035	15.4714	47.279	56.7023	57.3569	11.7599	18.1723	28.9679	AL356234.3

## Sheet: Table S2 gene signatures 4 cell
Gene	p_val	avg_log2FC	pct.1	pct.2	p_val_adj	cluster
TNXB	0	3.09577	0.45	0.077	0	fibroblasts
COL6A3	0	0.978108	0.623	0.439	0	fibroblasts
DCN	0	0.595029	0.819	0.711	0	fibroblasts
COL3A1	0	0.967066	0.934	0.836	0	fibroblasts
COL1A2	6.04005e-300	0.6019	0.854	0.775	7.91005e-296	fibroblasts
COL6A2	2.64912e-267	0.668492	0.646	0.502	3.46928e-263	fibroblasts
COL1A1	1.04724e-256	0.57949	0.859	0.782	1.37146e-252	fibroblasts
LUM	9.70224e-244	0.95743	0.336	0.195	1.2706e-239	fibroblasts
COL6A1	1.03727e-218	0.764187	0.438	0.293	1.35841e-214	fibroblasts
LTBP4	1.77047e-182	0.861258	0.282	0.165	2.31861e-178	fibroblasts
FSTL1	2.75535e-167	0.819555	0.266	0.155	3.60841e-163	fibroblasts
COL15A1	5.71224e-155	0.692727	0.372	0.251	7.48075e-151	fibroblasts
FBN1	2.80813e-145	0.92927	0.187	0.099	3.67753e-141	fibroblasts
COL5A1	2.87575e-130	0.692929	0.283	0.182	3.76608e-126	fibroblasts
ELN	1.73653e-122	1.0965	0.18	0.102	2.27416e-118	fibroblasts
FBLN1	3.89258e-121	1.26545	0.1	0.043	5.09773e-117	fibroblasts
SLIT3	3.41284e-116	1.02646	0.14	0.072	4.46946e-112	fibroblasts
C1R	1.10474e-115	0.731532	0.26	0.169	1.44677e-111	fibroblasts
CCN3	2.7812e-115	1.19205	0.11	0.051	3.64226e-111	fibroblasts
DPT	1.90599e-111	0.626668	0.339	0.24	2.49608e-107	fibroblasts
LAMC1	8.79855e-92	0.638134	0.233	0.153	1.15226e-87	fibroblasts
AKAP12	1.42063e-91	0.812385	0.166	0.099	1.86045e-87	fibroblasts
COL4A1	2.93605e-89	0.894527	0.154	0.09	3.84505e-85	fibroblasts
FBLN5	4.10592e-87	0.735964	0.199	0.127	5.37712e-83	fibroblasts
EMP1	4.28885e-87	0.754581	0.184	0.114	5.61668e-83	fibroblasts
ISLR	6.97808e-87	0.798529	0.157	0.093	9.13849e-83	fibroblasts
CCDC80	5.41201e-86	0.54503	0.344	0.256	7.08757e-82	fibroblasts
LAMA2	1.7869e-85	0.903386	0.132	0.074	2.34012e-81	fibroblasts
LTBP2	1.62421e-84	0.876543	0.202	0.133	2.12706e-80	fibroblasts
COL14A1	7.73341e-82	0.607613	0.253	0.175	1.01277e-77	fibroblasts
ANGPTL2	1.26319e-80	0.891882	0.105	0.055	1.65427e-76	fibroblasts
CPE	6.27287e-77	0.664554	0.208	0.139	8.21495e-73	fibroblasts
LSP1	1.53506e-75	0.536186	0.266	0.189	2.01031e-71	fibroblasts
COL4A2	1.18045e-74	0.804778	0.164	0.103	1.54591e-70	fibroblasts
SPARCL1	1.95013e-72	0.617539	0.22	0.151	2.55388e-68	fibroblasts
CD248	4.26819e-66	0.872889	0.104	0.058	5.58962e-62	fibroblasts
SRPX	1.10902e-62	0.914742	0.105	0.061	1.45237e-58	fibroblasts
MATN2	2.03092e-62	0.643388	0.185	0.126	2.65969e-58	fibroblasts
CD44	3.95771e-61	0.749712	0.112	0.066	5.18302e-57	fibroblasts
C1S	9.49618e-58	0.643344	0.163	0.109	1.24362e-53	fibroblasts
MRC2	1.34846e-57	0.516149	0.237	0.173	1.76595e-53	fibroblasts
COL5A2	2.47417e-57	0.581535	0.177	0.121	3.24017e-53	fibroblasts
FGL2	2.96797e-55	0.695662	0.126	0.079	3.88686e-51	fibroblasts
PTN	1.1171e-54	0.569762	0.191	0.134	1.46296e-50	fibroblasts
TIMP1	7.29522e-51	0.448552	0.237	0.175	9.55382e-47	fibroblasts
PCOLCE	8.30009e-51	0.551463	0.17	0.117	1.08698e-46	fibroblasts
CST3	1.01172e-50	0.480948	0.226	0.166	1.32495e-46	fibroblasts
COL12A1	3.24995e-48	0.643239	0.127	0.083	4.25614e-44	fibroblasts
PODN	2.26312e-47	0.657619	0.141	0.095	2.96378e-43	fibroblasts
PDGFRL	3.68407e-47	0.623012	0.126	0.082	4.82466e-43	fibroblasts
CPQ	7.31327e-47	0.626026	0.136	0.091	9.57745e-43	fibroblasts
GSN	2.24314e-44	0.579519	0.145	0.099	2.93761e-40	fibroblasts
PLXDC1	5.31519e-43	0.687623	0.109	0.07	6.96077e-39	fibroblasts
C7	2.96373e-41	0.856447	0.103	0.066	3.8813e-37	fibroblasts
LRP1	3.86356e-41	0.379531	0.308	0.248	5.05972e-37	fibroblasts
FN1	1.30624e-40	0.171108	0.176	0.126	1.71065e-36	fibroblasts
LOXL1	2.11921e-40	0.388228	0.164	0.116	2.77532e-36	fibroblasts
LGALS3BP	9.28573e-40	0.600021	0.122	0.082	1.21606e-35	fibroblasts
CTSK	1.45615e-38	0.549526	0.141	0.099	1.90698e-34	fibroblasts
SPARC	4.9898e-38	0.242258	0.652	0.595	6.53465e-34	fibroblasts
LAMB1	2.70789e-37	0.472403	0.18	0.133	3.54626e-33	fibroblasts
MMP2	3.76086e-37	0.202752	0.515	0.45	4.92522e-33	fibroblasts
ITM2B	1.79206e-34	0.456367	0.16	0.117	2.34688e-30	fibroblasts
SERPINF1	3.03784e-33	0.484397	0.16	0.118	3.97835e-29	fibroblasts
APP	1.62077e-32	0.410013	0.194	0.149	2.12256e-28	fibroblasts
ADAMTS2	6.227e-32	0.570811	0.105	0.072	8.15488e-28	fibroblasts
ADH1B	1.12579e-31	0.473052	0.152	0.112	1.47433e-27	fibroblasts
SPRY1	1.16851e-30	0.427832	0.182	0.14	1.53028e-26	fibroblasts
IGFBP3	8.26372e-29	0.369182	0.2	0.157	1.08222e-24	fibroblasts
MARCKS	9.06268e-29	0.312677	0.227	0.181	1.18685e-24	fibroblasts
CAV1	1.68458e-27	0.477043	0.109	0.077	2.20613e-23	fibroblasts
GASK1B	4.55398e-27	0.467962	0.139	0.104	5.9639e-23	fibroblasts
LAMA4	9.68369e-27	0.396935	0.149	0.112	1.26818e-22	fibroblasts
EMILIN1	1.13148e-26	0.444225	0.147	0.111	1.48179e-22	fibroblasts
PSAP	1.83082e-26	0.346325	0.197	0.156	2.39765e-22	fibroblasts
CXCL12	2.52149e-26	0.291892	0.34	0.291	3.30214e-22	fibroblasts
CCN2	2.80992e-25	0.443333	0.112	0.081	3.67987e-21	fibroblasts
PDGFRB	4.29056e-25	0.454178	0.135	0.102	5.61892e-21	fibroblasts
CFH	6.32758e-25	0.414328	0.138	0.104	8.28659e-21	fibroblasts
LAMP1	1.12042e-21	0.405303	0.12	0.091	1.4673e-17	fibroblasts
PLPP3	5.44119e-20	0.35843	0.123	0.094	7.12578e-16	fibroblasts
DPYSL3	1.1251e-18	0.347203	0.111	0.084	1.47343e-14	fibroblasts
CYBRD1	4.64445e-18	0.32097	0.15	0.12	6.08237e-14	fibroblasts
PRSS23	1.09002e-17	0.374646	0.113	0.087	1.42749e-13	fibroblasts
LTBP3	1.8507e-16	0.269485	0.16	0.13	2.42368e-12	fibroblasts
OS9	2.23048e-15	0.339682	0.119	0.095	2.92103e-11	fibroblasts
MFAP4	5.28115e-15	0.2766	0.114	0.09	6.9162e-11	fibroblasts
IFITM3	7.10369e-12	0.339324	0.129	0.107	9.30299e-08	fibroblasts
CNN3	7.86218e-12	0.219535	0.18	0.154	1.02963e-07	fibroblasts
EID1	5.26096e-11	0.201561	0.151	0.128	6.88975e-07	fibroblasts
MMP14	1.49189e-10	0.149314	0.119	0.098	1.95378e-06	fibroblasts
NFIB	8.97598e-10	0.254479	0.135	0.115	1.17549e-05	fibroblasts
ALDH1A1	2.74071e-09	0.187526	0.157	0.135	3.58923e-05	fibroblasts
ADGRA2	3.50343e-09	0.295372	0.103	0.086	4.5881e-05	fibroblasts
FAM3C	3.9655e-09	0.21254	0.125	0.106	5.19322e-05	fibroblasts
ANXA5	2.09891e-08	0.134641	0.172	0.15	0.000274873	fibroblasts
NR1D1	2.83112e-08	0.251002	0.107	0.09	0.000370763	fibroblasts
MXRA8	1.0784e-07	0.237542	0.11	0.094	0.00141227	fibroblasts
S100A4	1.08013e-07	0.123353	0.19	0.168	0.00141454	fibroblasts
MT-CYB	1.09967e-07	0.102559	0.354	0.328	0.00144012	fibroblasts
BOC	1.45534e-07	0.227655	0.135	0.117	0.00190591	fibroblasts
BGN	3.88358e-07	0.284264	0.136	0.119	0.00508593	fibroblasts
MT-ND2	1.11199e-06	0.144949	0.175	0.156	0.0145626	fibroblasts
MAGED2	1.43083e-06	0.180083	0.15	0.133	0.0187381	fibroblasts
MT-ND4L	1.80309e-06	0.128099	0.164	0.146	0.0236132	fibroblasts
CYB5R3	2.55641e-06	0.18995	0.113	0.098	0.0334787	fibroblasts
NUCB1	2.57833e-06	0.185048	0.104	0.089	0.0337659	fibroblasts
CD63	5.93042e-06	0.160544	0.108	0.093	0.0776647	fibroblasts
SKI	1.78882e-05	0.153336	0.105	0.092	0.234264	fibroblasts
MGP	0.000119394	0.360778	0.384	0.374	1	fibroblasts
MT-ND5	0.000155823	0.133395	0.109	0.097	1	fibroblasts
ANXA11	0.0037317	0.113615	0.111	0.102	1	fibroblasts
H1F0	0.00809124	0.122421	0.103	0.095	1	fibroblasts
TNNI1	1.89565e-38	0.919098	0.116	0.081	2.48254e-34	modified SM cells
NES	4.93085e-22	0.532755	0.15	0.12	6.45744e-18	modified SM cells
EHBP1L1	5.40782e-16	0.370541	0.118	0.095	7.08208e-12	modified SM cells
CIRBP	8.20862e-15	0.226235	0.221	0.193	1.075e-10	modified SM cells
PLEKHA6	6.65491e-14	0.284473	0.152	0.128	8.71527e-10	modified SM cells
ANKRD10	5.2444e-11	0.3642	0.105	0.087	6.86806e-07	modified SM cells
CLIC4	2.38822e-10	0.517093	0.157	0.14	3.12761e-06	modified SM cells
C1orf198	1.66456e-09	0.193659	0.238	0.215	2.17991e-05	modified SM cells
DES	1.89147e-07	0.553948	0.135	0.122	0.00247706	modified SM cells
LENG8	5.56206e-05	0.166578	0.143	0.131	0.728407	modified SM cells
PFN1	0.000283959	0.109032	0.156	0.144	1	modified SM cells
TERT	0.000351131	0.11746	0.141	0.129	1	modified SM cells
ATN1	0.000413113	0.124541	0.138	0.127	1	modified SM cells
TNS2	0.000439368	0.197985	0.106	0.097	1	modified SM cells
WSB1	0.000784428	0.106736	0.141	0.13	1	modified SM cells
MXRA7	0.00346345	0.127774	0.18	0.171	1	modified SM cells
HNRNPA2B1	0.00696882	0.107711	0.146	0.137	1	modified SM cells
SPRY2	0.00787046	0.113219	0.129	0.121	1	modified SM cells
ANXA11	0.0094922	0.150933	0.108	0.101	1	modified SM cells
TPM1	0	2.56162	0.433	0.134	0	modified fibroblasts
ATP2A1	0	5.19092	0.141	0.026	0	modified fibroblasts
TNNC2	0	4.62704	0.143	0.032	0	modified fibroblasts
FN1	1.03297e-188	1.87986	0.259	0.124	1.35278e-184	modified fibroblasts
LOXL1	1.9729e-127	1.3427	0.226	0.116	2.58371e-123	modified fibroblasts
IGFBP7	4.62302e-122	1.40023	0.192	0.093	6.0543e-118	modified fibroblasts
TAGLN	2.30396e-88	1.05799	0.203	0.112	3.01727e-84	modified fibroblasts
VIM	5.47074e-85	1.08241	0.589	0.529	7.16448e-81	modified fibroblasts
SH3BGRL3	2.4925e-78	1.36436	0.131	0.064	3.26418e-74	modified fibroblasts
COL4A1	5.43042e-76	1.01129	0.178	0.099	7.11168e-72	modified fibroblasts
LGALS1	6.79247e-75	0.892063	0.419	0.328	8.89542e-71	modified fibroblasts
TPM4	8.56535e-71	1.33935	0.101	0.045	1.12172e-66	modified fibroblasts
BGN	1.70328e-69	0.953641	0.195	0.114	2.23062e-65	modified fibroblasts
TMSB4X	6.43017e-68	0.75946	0.497	0.415	8.42096e-64	modified fibroblasts
FTH1	1.42261e-67	1.31179	0.128	0.065	1.86305e-63	modified fibroblasts
MMP14	1.19542e-66	1.14407	0.167	0.095	1.56552e-62	modified fibroblasts
CTSB	6.55935e-63	1.10273	0.172	0.101	8.59013e-59	modified fibroblasts
COL1A1	8.74808e-59	0.461014	0.845	0.798	1.14565e-54	modified fibroblasts
COL4A2	1.25433e-58	0.845258	0.185	0.112	1.64268e-54	modified fibroblasts
MYL9	6.97512e-57	1.08854	0.123	0.065	9.13461e-53	modified fibroblasts
YBX1	3.02134e-54	1.11181	0.143	0.082	3.95674e-50	modified fibroblasts
S100A6	1.91253e-49	0.783341	0.32	0.243	2.50465e-45	modified fibroblasts
ACTB	1.38131e-46	0.748799	0.3	0.225	1.80896e-42	modified fibroblasts
CRABP2	3.19256e-46	0.98999	0.129	0.075	4.18097e-42	modified fibroblasts
SPARC	4.55004e-46	0.462291	0.658	0.605	5.95873e-42	modified fibroblasts
RTN4	9.13849e-46	1.05625	0.15	0.092	1.19678e-41	modified fibroblasts
MSN	3.37574e-41	0.962967	0.111	0.063	4.42087e-37	modified fibroblasts
TPM2	3.59474e-41	0.959133	0.281	0.212	4.70767e-37	modified fibroblasts
DPYSL3	4.62341e-41	0.875587	0.139	0.085	6.05481e-37	modified fibroblasts
MFAP2	1.2347e-40	0.973329	0.128	0.077	1.61696e-36	modified fibroblasts
FSTL1	2.7871e-39	0.687438	0.245	0.179	3.64999e-35	modified fibroblasts
MFAP4	4.46501e-39	0.9774	0.144	0.09	5.84737e-35	modified fibroblasts
S100A16	7.14994e-34	0.842942	0.123	0.076	9.36356e-30	modified fibroblasts
PFN1	7.31006e-34	0.737597	0.201	0.143	9.57326e-30	modified fibroblasts
PRSS23	3.63405e-33	0.789984	0.138	0.089	4.75915e-29	modified fibroblasts
CALU	4.20946e-33	0.623959	0.192	0.134	5.51271e-29	modified fibroblasts
LMNA	7.37179e-33	0.670701	0.338	0.279	9.65409e-29	modified fibroblasts
SQSTM1	4.85324e-32	0.758391	0.174	0.121	6.3558e-28	modified fibroblasts
ANXA5	8.20993e-31	0.695649	0.205	0.15	1.07517e-26	modified fibroblasts
ANXA2	1.72991e-30	0.850479	0.172	0.122	2.26549e-26	modified fibroblasts
ANGPTL2	1.49941e-29	0.899162	0.105	0.065	1.96363e-25	modified fibroblasts
FBN1	5.23463e-28	0.731614	0.168	0.118	6.85527e-24	modified fibroblasts
CCN2	1.48086e-27	0.808905	0.128	0.085	1.93933e-23	modified fibroblasts
EMP3	3.6961e-27	0.7383	0.14	0.095	4.84042e-23	modified fibroblasts
HSPB1	1.84935e-26	0.78015	0.11	0.07	2.4219e-22	modified fibroblasts
ACTG1	1.90155e-26	0.736636	0.122	0.081	2.49027e-22	modified fibroblasts
CD44	5.08024e-26	0.754255	0.114	0.074	6.65308e-22	modified fibroblasts
ZYX	9.84703e-25	0.72589	0.109	0.071	1.28957e-20	modified fibroblasts
TMSB10	3.27839e-23	0.501776	0.266	0.214	4.29339e-19	modified fibroblasts
CLU	1.02155e-22	0.847513	0.191	0.148	1.33783e-18	modified fibroblasts
PALLD	3.81826e-22	0.582946	0.113	0.076	5.0004e-18	modified fibroblasts
COL6A2	1.16685e-20	0.228962	0.585	0.538	1.52811e-16	modified fibroblasts
CFL1	2.59636e-19	0.608275	0.149	0.109	3.40019e-15	modified fibroblasts
MMP2	2.51654e-18	0.430472	0.496	0.464	3.29566e-14	modified fibroblasts
MFGE8	4.754e-18	0.527028	0.165	0.125	6.22584e-14	modified fibroblasts
B2M	6.77515e-18	0.512867	0.15	0.112	8.87273e-14	modified fibroblasts
CAV1	3.68971e-17	0.558952	0.115	0.082	4.83205e-13	modified fibroblasts
COL5A1	1.46355e-16	0.457387	0.249	0.206	1.91666e-12	modified fibroblasts
COL1A2	3.94814e-16	0.175204	0.821	0.794	5.17049e-12	modified fibroblasts
BRI3	8.7537e-15	0.534451	0.111	0.081	1.14638e-10	modified fibroblasts
COL6A3	2.05059e-14	0.178234	0.528	0.487	2.68545e-10	modified fibroblasts
DRAP1	1.05263e-13	0.626384	0.106	0.078	1.37852e-09	modified fibroblasts
MT-CO3	1.7212e-13	0.2614	0.386	0.345	2.25408e-09	modified fibroblasts
LAMC1	1.80047e-13	0.427879	0.208	0.172	2.3579e-09	modified fibroblasts
LTBP2	4.93886e-13	0.271223	0.186	0.148	6.46794e-09	modified fibroblasts
MAP4	8.49303e-13	0.514112	0.128	0.099	1.11225e-08	modified fibroblasts
OAZ1	3.62034e-12	0.372194	0.26	0.224	4.7412e-08	modified fibroblasts
S100A4	1.46794e-10	0.47256	0.2	0.171	1.92241e-06	modified fibroblasts
SERPINH1	1.65355e-10	0.435922	0.103	0.078	2.16549e-06	modified fibroblasts
COL6A1	5.31768e-10	0.239788	0.366	0.33	6.96404e-06	modified fibroblasts
CNN3	6.79135e-10	0.392789	0.188	0.158	8.89395e-06	modified fibroblasts
MT-ATP6	7.09175e-09	0.152661	0.415	0.38	9.28736e-05	modified fibroblasts
MT-ND4	6.7391e-08	0.174725	0.365	0.334	0.000882553	modified fibroblasts
DES	6.93065e-08	0.249669	0.152	0.125	0.000907638	modified fibroblasts
CYB5R3	3.21183e-06	0.375666	0.12	0.1	0.0420621	modified fibroblasts
NUCB1	8.70942e-06	0.382852	0.109	0.091	0.114059	modified fibroblasts
HNRNPA2B1	1.48143e-05	0.385281	0.159	0.139	0.194008	modified fibroblasts
EMP1	1.61465e-05	0.290505	0.152	0.132	0.211455	modified fibroblasts
CSRP1	2.02757e-05	0.270855	0.208	0.187	0.265531	modified fibroblasts
MXRA8	3.52823e-05	0.329609	0.113	0.097	0.462056	modified fibroblasts
LUM	7.60003e-05	0.21142	0.253	0.233	0.9953	modified fibroblasts
CRTAP	0.000126855	0.263917	0.124	0.108	1	modified fibroblasts
COL5A2	0.000160362	0.271125	0.152	0.135	1	modified fibroblasts
RHOB	0.000183776	0.322353	0.147	0.13	1	modified fibroblasts
NFE2L1	0.000222469	0.263482	0.102	0.087	1	modified fibroblasts
TNNT3	0.000704846	1.18258	0.317	0.32	1	modified fibroblasts
PSAP	0.000775161	0.244544	0.182	0.166	1	modified fibroblasts
PHLDB1	0.0027166	0.198118	0.115	0.102	1	modified fibroblasts
ISLR	0.00320811	0.26955	0.123	0.11	1	modified fibroblasts
CAPN2	0.00367742	0.258339	0.145	0.132	1	modified fibroblasts
CTTN	0.00389494	0.251772	0.116	0.104	1	modified fibroblasts
TNNT3	0	1.62176	0.814	0.263	0	Smooth Muscle
TPM2	3.77569e-83	0.50132	0.337	0.208	4.94464e-79	Smooth Muscle
C1orf198	1.82319e-35	0.428987	0.299	0.218	2.38765e-31	Smooth Muscle
ALDH1A1	4.92421e-35	0.600082	0.201	0.135	6.44874e-31	Smooth Muscle
DHRS3	2.57476e-25	0.681899	0.114	0.071	3.37191e-21	Smooth Muscle
CXCL12	1.34932e-20	0.258924	0.368	0.298	1.76706e-16	Smooth Muscle
SPRY2	1.22399e-19	0.462414	0.167	0.12	1.60294e-15	Smooth Muscle
IGFBP3	3.44312e-17	0.358466	0.214	0.164	4.50911e-13	Smooth Muscle
TERT	9.75279e-17	0.407529	0.174	0.13	1.27723e-12	Smooth Muscle
CCDC102B	1.50101e-16	0.592264	0.101	0.068	1.96572e-12	Smooth Muscle
MYOC	5.64864e-16	0.498863	0.112	0.078	7.39746e-12	Smooth Muscle
SPRY1	2.39605e-13	0.322675	0.19	0.148	3.13787e-09	Smooth Muscle
PAGR1	3.41865e-13	0.491146	0.107	0.076	4.47706e-09	Smooth Muscle
ADH1B	9.0645e-13	0.309745	0.157	0.12	1.18709e-08	Smooth Muscle
C7	1.54084e-11	0.381991	0.102	0.074	2.01788e-07	Smooth Muscle
TNS2	1.61411e-09	0.352831	0.127	0.098	2.11384e-05	Smooth Muscle
C1orf21	2.28581e-09	0.351949	0.101	0.076	2.99349e-05	Smooth Muscle
ARGLU1	3.55447e-08	0.360686	0.11	0.086	0.000465493	Smooth Muscle
PLEKHA6	4.25483e-08	0.260469	0.166	0.136	0.000557212	Smooth Muscle
FBLN5	1.68728e-07	0.205109	0.175	0.145	0.00220967	Smooth Muscle
CIRBP	1.34614e-06	0.18594	0.235	0.203	0.0176291	Smooth Muscle
CCNL2	4.19751e-05	0.216547	0.145	0.124	0.549706	Smooth Muscle
MEOX2	7.08955e-05	0.25679	0.108	0.09	0.928448	Smooth Muscle
WSB1	0.000116292	0.177809	0.154	0.133	1	Smooth Muscle
NFIB	0.000125941	0.227987	0.138	0.119	1	Smooth Muscle
LENG8	0.000183231	0.170697	0.155	0.135	1	Smooth Muscle
SFRP2	0.000188513	0.127645	0.1	0.083	1	Smooth Muscle
HIPK3	0.00492784	0.162979	0.117	0.103	1	Smooth Muscle
MT-ND2	0.00561675	0.161394	0.175	0.16	1	Smooth Muscle
EPB41L2	0.00907981	0.105501	0.134	0.121	1	Smooth Muscle

## Sheet: Table S3 3D 68K Ct vs PQ
	p_val	avg_log2FC	pct.1	pct.2	p_val_adj		DOWN	UP	TOTAL
C11orf54	9.82e-05	1.00864	0.014	0.007	1		154	38	192
DDX50	0.000163836	1.00973	0.013	0.007	1
CAB39L	7.11e-06	1.0108	0.02	0.01	0.115559
FAM53C	0.000358812	1.0134	0.012	0.006	1
SLC35D2	0.00146789	1.02333	0.01	0.005	1
WDR70	3.17e-05	1.02409	0.015	0.007	0.515758
TMEM240	0.00059588	1.04781	0.011	0.005	1
ATAD2B	8.21e-05	1.05034	0.014	0.007	1
TBC1D24	0.000270616	1.05186	0.012	0.006	1
CCNDBP1	0.000155199	1.07177	0.012	0.006	1
RSAD1	2.54e-05	1.07312	0.014	0.006	0.411918
PIK3CA	0.000194823	1.09054	0.012	0.005	1
PLEKHO1	0.000357613	1.10417	0.011	0.005	1
PAM16	0.000111183	1.1093	0.012	0.006	1
WDR19	1.89e-07	1.12721	0.018	0.008	0.00306818
ASCC1	3.01e-05	1.15285	0.014	0.006	0.488542
SMG1	7.99e-05	1.16625	0.012	0.005	1
CENPX	0.000376475	1.17898	0.01	0.004	1
CCN2	3.29e-37	1.18626	0.123	0.058	5.34e-33
CAAP1	9.76e-07	1.18823	0.018	0.008	0.0158538
FILIP1L	1.63e-07	1.1933	0.021	0.01	0.00264611
PCGF5	2.58e-05	1.22578	0.013	0.005	0.418962
GPX3	2.59e-05	1.25638	0.012	0.005	0.420607
CSRNP2	2.6e-05	1.28844	0.012	0.005	0.42168
IFITM2	3.82e-06	1.29898	0.014	0.006	0.0621439
NR1H3	2.57e-05	1.32516	0.011	0.004	0.416933
DIAPH1	1.76e-06	1.34575	0.015	0.006	0.0286363
HIF3A	2.54e-07	1.38531	0.016	0.006	0.00412754
ANKRD13A	7.79e-06	1.39665	0.012	0.004	0.126505
KCTD9	2.98e-05	1.39821	0.01	0.004	0.484933
ACTA2	5.5e-05	1.4061	0.01	0.004	0.893492
LEPR	2.97e-06	1.41002	0.013	0.005	0.0483328
JUN	2.39e-10	1.50333	0.023	0.009	3.89e-06
AMOTL2	3.36e-13	1.56341	0.028	0.01	5.45e-09
CCN1	3.47e-17	1.63114	0.037	0.013	5.64e-13
ZBTB21	9.36e-07	1.82415	0.01	0.003	0.0152019
BCL6	3.75e-09	1.87177	0.014	0.004	6.1e-05
APOE	9.25e-36	-10.6564	0	0.015	1.5e-31
NNAT	8.27e-31	-10.6381	0	0.013	1.34e-26
LPL	4.67e-24	-10.054	0	0.01	7.58e-20
COLGALT2	1.32e-23	-9.96846	0	0.01	2.14e-19
HEYL	5.46e-25	-6.75185	0	0.011	8.86e-21
HSF1	8.29e-23	-5.63375	0	0.01	1.35e-18
ADAMTS19	1.85e-22	-5.09983	0	0.01	3.01e-18
DUSP3	2.44e-19	-3.02215	0.002	0.013	3.96e-15
ATP2A1	1.51e-34	-2.97409	0.023	0.061	2.46e-30
MEST	6.76e-23	-2.80721	0.002	0.016	1.1e-18
PHLDA1	4.75e-15	-2.65847	0.002	0.011	7.72e-11
TNNC2	2.51e-36	-2.61486	0.022	0.062	4.07e-32
ANP32E	4.95e-17	-2.61001	0.002	0.013	8.03e-13
SYNGAP1	1.28e-14	-2.26738	0.003	0.014	2.07e-10
NELFE	6.86e-12	-2.26612	0.002	0.01	1.12e-07
AP4M1	3.51e-11	-2.24736	0.002	0.01	5.7e-07
SEC61B	1.31e-13	-2.22518	0.003	0.012	2.13e-09
MAP4K2	8.39e-11	-2.18056	0.002	0.01	1.36e-06
PHC1	4.33e-10	-2.16856	0.002	0.01	7.04e-06
OST4	1.45e-13	-2.11662	0.003	0.013	2.36e-09
OLFML2A	1.46e-13	-2.11147	0.003	0.013	2.37e-09
PREX2	3.87e-11	-2.0264	0.003	0.011	6.28e-07
CRADD	8.48e-11	-1.97587	0.003	0.011	1.38e-06
CILP	4.09e-10	-1.97394	0.003	0.01	6.65e-06
RETREG3	6.14e-12	-1.96896	0.004	0.013	9.97e-08
C18orf32	1.64e-09	-1.87997	0.003	0.011	2.67e-05
FAXDC2	9.62e-11	-1.87922	0.004	0.013	1.56e-06
SEMA4F	2.82e-09	-1.84648	0.003	0.011	4.58e-05
YWHAB	5.81e-10	-1.83453	0.003	0.012	9.43e-06
SNCG	3.1e-27	-1.81692	0.013	0.039	5.04e-23
C7	1.17e-37	-1.80017	0.017	0.054	1.91e-33
SCARA5	2.86e-12	-1.79323	0.005	0.016	4.64e-08
C12orf4	2.85e-09	-1.74711	0.003	0.011	4.63e-05
KCNN3	3.45e-18	-1.71212	0.009	0.027	5.61e-14
SLC30A5	1.28e-08	-1.71076	0.003	0.01	0.000208722
TOMM40L	8.42e-09	-1.71027	0.004	0.011	0.000136749
EHD4	3.74e-10	-1.70138	0.004	0.013	6.07e-06
CD4	1.44e-13	-1.69552	0.007	0.02	2.34e-09
PELP1	4.24e-09	-1.68646	0.004	0.012	6.88e-05
KIAA1217	5.72e-08	-1.67112	0.003	0.01	0.000928688
LINGO1	6.3e-10	-1.65576	0.004	0.013	1.02e-05
MAP3K10	1.05e-07	-1.65538	0.003	0.01	0.00170156
FAIM	1.84e-08	-1.65096	0.004	0.011	0.000299519
POLD4	1.15e-07	-1.64203	0.003	0.01	0.00186541
VPS13B	4.01e-08	-1.63894	0.003	0.011	0.000651153
SLC16A3	1.25e-07	-1.61258	0.004	0.011	0.00203607
AAGAB	8.73e-08	-1.5987	0.003	0.01	0.00141803
OLFM2	6.5e-08	-1.59076	0.004	0.012	0.00105529
ARHGEF11	1.05e-07	-1.58392	0.003	0.01	0.00171328
CXXC5	2.22e-08	-1.56624	0.004	0.012	0.000361249
SCUBE2	8.27e-09	-1.54543	0.005	0.013	0.000134376
THAP12	4.78e-12	-1.54486	0.007	0.019	7.76e-08
CHCHD3	1.27e-08	-1.54243	0.004	0.012	0.000206909
GLUD1	3.34e-07	-1.54222	0.003	0.01	0.0054337
FAM217B	4.3e-08	-1.51822	0.004	0.012	0.000699341
MPP1	2.21e-09	-1.5172	0.005	0.015	3.59e-05
XYLT2	4.83e-12	-1.5166	0.007	0.019	7.84e-08
HNRNPR	8.83e-10	-1.50207	0.005	0.015	1.43e-05
ID4	1.41e-09	-1.41951	0.006	0.016	2.29e-05
COL4A6	2.82e-08	-1.41951	0.006	0.015	0.000457643
METTL23	3.23e-08	-1.38825	0.006	0.014	0.00052413
XRRA1	2.27e-05	-1.36925	0.004	0.01	0.368477
PCGF1	6.69e-10	-1.36634	0.007	0.018	1.09e-05
AMACR	1.11e-05	-1.36378	0.004	0.01	0.179577
TSTA3	2.38e-07	-1.36022	0.006	0.013	0.0038696
ATP1B2	6.4e-13	-1.35055	0.011	0.026	1.04e-08
MAF	4.55e-11	-1.33558	0.009	0.022	7.4e-07
QPRT	8.06e-06	-1.321	0.004	0.01	0.130911
G0S2	1.13e-20	-1.31891	0.019	0.044	1.83e-16
ZNF385A	7.02e-08	-1.31798	0.006	0.015	0.00114072
FAM120B	3.7e-07	-1.31573	0.006	0.013	0.00600698
LRFN4	3.8e-06	-1.31525	0.005	0.011	0.0617771
LAGE3	3.29e-07	-1.3099	0.006	0.014	0.0053378
CCDC97	1.62e-07	-1.30719	0.006	0.014	0.00262534
TMED3	2.83e-07	-1.30719	0.006	0.014	0.00459992
SERPINE2	2.03e-23	-1.29627	0.025	0.056	3.29e-19
PEG10	7.46e-07	-1.258	0.006	0.013	0.0121246
MEF2C	7.66e-06	-1.24665	0.005	0.011	0.124455
OSTF1	7.66e-06	-1.24665	0.005	0.011	0.124455
VSTM4	2.9e-07	-1.23504	0.006	0.014	0.00471538
ZNF441	9.9e-07	-1.2302	0.006	0.013	0.0160865
VASH2	2.47e-11	-1.22631	0.01	0.024	4.01e-07
MADD	2.41e-09	-1.22509	0.009	0.021	3.92e-05
FAH	5.05e-06	-1.22121	0.005	0.012	0.0821173
BLCAP	1.49e-06	-1.21805	0.005	0.013	0.0242644
RNF2	1.91e-07	-1.21627	0.007	0.016	0.00310946
ID2	8.6e-07	-1.215	0.005	0.013	0.013975
CAPRIN2	6.86e-09	-1.21193	0.009	0.02	0.000111509
ZDHHC3	8.33e-07	-1.20552	0.007	0.015	0.0135365
LRRC17	1.48e-07	-1.20315	0.007	0.015	0.00240317
BHLHE40	1.09e-15	-1.19008	0.017	0.038	1.77e-11
ZNF516	4.44e-06	-1.17492	0.007	0.015	0.0720704
GOLGA1	2.37e-06	-1.17309	0.007	0.015	0.0384588
METRN	1.62e-06	-1.17004	0.007	0.014	0.0263229
PTPN11	2.64e-05	-1.16838	0.006	0.012	0.428272
TPM1	9.81e-05	-1.16832	0.093	0.11	1
ZSCAN2	3.39e-05	-1.16613	0.005	0.011	0.550054
IGFBP4	2.9e-18	-1.16261	0.023	0.049	4.71e-14
SLC25A45	4.91e-08	-1.16201	0.009	0.019	0.00079847
B4GALT7	5.68e-08	-1.14781	0.009	0.019	0.000923298
ANP32A	2.87e-07	-1.14293	0.008	0.017	0.00466434
DCP2	7.91e-06	-1.13725	0.006	0.013	0.128575
CDK6	2.23e-05	-1.13366	0.005	0.011	0.36256
DNAJC18	6.13e-05	-1.12184	0.006	0.012	0.995619
CINP	5.31e-05	-1.12037	0.006	0.012	0.863442
SPOCK2	8.74e-05	-1.11797	0.005	0.01	1
TMEM116	0.000209169	-1.11617	0.005	0.01	1
SPICE1	0.000192011	-1.11491	0.006	0.012	1
STRIP1	8.27e-05	-1.11119	0.005	0.01	1
SV2A	7.94e-06	-1.10785	0.007	0.014	0.128929
TENM4	3.26e-05	-1.10675	0.005	0.011	0.529245
NCK2	0.000373102	-1.10675	0.005	0.01	1
ELN	9.89e-46	-1.10118	0.099	0.176	1.61e-41
ANGPTL1	1.03e-18	-1.10049	0.031	0.06	1.68e-14
PDIA5	5.33e-05	-1.09804	0.006	0.012	0.866235
TUB	5.33e-05	-1.09804	0.006	0.012	0.866235
SEC22C	1.51e-05	-1.09589	0.006	0.013	0.245685
CLIP2	9.54e-07	-1.0944	0.008	0.017	0.0154992
NTN4	1.56e-10	-1.09422	0.014	0.03	2.53e-06
IFFO1	6.16e-05	-1.08691	0.007	0.013	1
ABLIM3	3.7e-06	-1.08614	0.007	0.015	0.060161
LFNG	7.7e-24	-1.08569	0.042	0.081	1.25e-19
METTL5	6.35e-06	-1.08467	0.007	0.015	0.103115
CHAMP1	6.25e-05	-1.08222	0.005	0.011	1
RAB17	5.42e-05	-1.08126	0.005	0.011	0.880691
RAB5IF	6.17e-05	-1.07611	0.006	0.012	1
PRSS23	5.75e-22	-1.07386	0.04	0.076	9.34e-18
SLC43A3	9.62e-07	-1.07323	0.009	0.018	0.0156326
GXYLT2	1.77e-07	-1.07234	0.009	0.019	0.00287026
ADAMTS15	2.33e-07	-1.06911	0.01	0.02	0.00379227
SNRNP25	3.94e-05	-1.06731	0.007	0.014	0.639864
TRPS1	4.54e-06	-1.0668	0.007	0.015	0.0738256
SPATA5	3.43e-06	-1.06583	0.007	0.015	0.0556635
ZNF345	1.69e-06	-1.06279	0.008	0.016	0.0274951
TMEM25	0.000182299	-1.05797	0.005	0.01	1
COA8	0.000182299	-1.05797	0.005	0.01	1
PLPBP	5.83e-05	-1.05393	0.005	0.011	0.947812
PARG	7.49e-05	-1.05193	0.006	0.012	1
EXOSC8	2.49e-05	-1.05157	0.006	0.013	0.404588
RHBDD2	4.89e-05	-1.05088	0.006	0.013	0.793948
ALG12	5.09e-05	-1.04992	0.007	0.013	0.826228
NPY1R	1.81e-05	-1.04876	0.007	0.014	0.293826
TUBG2	2.49e-06	-1.04554	0.008	0.017	0.0405276
UFD1	3.33e-05	-1.02888	0.007	0.013	0.541462
TMOD2	5.51e-05	-1.02888	0.007	0.014	0.894399
ESS2	0.000298568	-1.02888	0.005	0.01	1
GLB1	0.000313636	-1.02888	0.005	0.01	1
CFAP20	2.45e-05	-1.01313	0.009	0.016	0.398311
ZDHHC5	4.17e-05	-1.01053	0.008	0.014	0.676735
WDR55	7.2e-05	-1.00873	0.007	0.013	1
TRIL	1.71e-11	-1.00709	0.018	0.036	2.77e-07
ZNFX1	0.00019441	-1.00689	0.006	0.012	1
TRAPPC8	0.000159929	-1.00468	0.006	0.011	1
TGFB3	5.31e-07	-1.00268	0.011	0.021	0.00862256

## Sheet: Table S4 3D 68Q Ct vs PQ
	p_val	avg_log2FC	pct.1	pct.2	p_val_adj
ACTC1	0	-15.8314	0	0.156	0
MYL2	2.12411e-234	-14.4408	0	0.085	3.45104e-230
TNNT2	2.22219e-184	-13.5872	0	0.067	3.6104e-180
TTN	5.77541e-179	-13.5696	0	0.065	9.38331e-175
CHRNG	5.45565e-158	-13.5268	0	0.058	8.8638e-154
NEB	3.2406e-162	-13.2876	0	0.059	5.26501e-158
MYBPH	6.36771e-131	-13.0979	0	0.048	1.03456e-126
MYH3	5.27892e-119	-12.8857	0	0.044	8.57665e-115
MYOG	2.09873e-122	-12.873	0	0.045	3.40981e-118
ASB5	7.96059e-106	-12.5853	0	0.039	1.29336e-101
MYMK	5.16294e-106	-12.5559	0	0.039	8.38823e-102
MYL1	5.62665e-89	-12.3289	0	0.033	9.14162e-85
SMPX	1.27804e-85	-12.2181	0	0.031	2.07643e-81
MYH2	4.12191e-87	-12.2156	0	0.032	6.69687e-83
HSPB3	1.43009e-83	-12.0844	0	0.031	2.32347e-79
CASQ2	2.08977e-80	-12.0844	0	0.03	3.39524e-76
RAMP1	1.71399e-71	-11.878	0	0.026	2.78471e-67
MYL4	9.94582e-59	-11.5442	0	0.021	1.6159e-54
TRIM72	8.32423e-58	-11.52	0	0.021	1.35244e-53
LMOD2	3.38415e-53	-11.419	0	0.019	5.49823e-49
MYOD1	2.3512e-51	-11.4059	0	0.019	3.82e-47
SYNPO2L	8.38469e-51	-11.3971	0	0.019	1.36226e-46
SRL	4.31099e-52	-11.3567	0	0.019	7.00407e-48
TNNI1	0	-11.3332	0	0.174	0
COX6A2	2.82048e-52	-11.3292	0	0.019	4.58244e-48
TCAP	2.28884e-44	-11.1622	0	0.016	3.71868e-40
TDRD1	2.76e-45	-11.1412	0	0.016	4.48417e-41
DYSF	1.89696e-43	-11.1037	0	0.016	3.08199e-39
VGLL2	8.89876e-40	-10.9614	0	0.014	1.44578e-35
PVALB	2.48127e-29	-10.9373	0	0.01	4.03133e-25
SHD	3.822e-40	-10.9127	0	0.015	6.2096e-36
PPFIA4	5.01749e-37	-10.8814	0	0.013	8.15192e-33
PTGDS	7.94385e-35	-10.8495	0	0.013	1.29064e-30
DUSP27	5.01631e-37	-10.7968	0	0.013	8.15001e-33
XIRP1	4.29466e-34	-10.7211	0	0.012	6.97753e-30
PCDH20	6.31349e-36	-10.6997	0	0.013	1.02575e-31
MEGF10	7.94185e-35	-10.6486	0	0.013	1.29031e-30
COL19A1	8.22813e-33	-10.6109	0	0.012	1.33682e-28
SMYD1	1.25444e-32	-10.5956	0	0.012	2.03808e-28
CARNS1	5.39623e-33	-10.5723	0	0.012	8.76726e-29
KRT80	6.77775e-32	-10.5486	0	0.011	1.10118e-27
CDH15	4.59464e-30	-10.5245	0	0.011	7.46492e-26
CHRND	3.66076e-31	-10.4666	0	0.011	5.94763e-27
SRPK3	1.29694e-30	-10.4582	0	0.011	2.10713e-26
RDH5	1.97706e-30	-10.4582	0	0.011	3.21213e-26
KCNJ6	3.78087e-29	-10.4238	0	0.01	6.14279e-25
KCNQ4	3.7807e-29	-10.3708	0	0.01	6.1425e-25
SCN5A	7.22642e-28	-10.3343	0	0.01	1.17408e-23
TRIM54	1.67877e-27	-10.325	0	0.01	2.7275e-23
CCDC141	2.55871e-27	-10.3063	0	0.01	4.15714e-23
CHRNA1	2.59764e-179	-10.1336	0	0.066	4.22039e-175
MYLPF	8.03139e-209	-9.53603	0	0.076	1.30486e-204
NCAM1	1.83341e-127	-9.43884	0	0.047	2.97873e-123
KLHL41	2.07906e-121	-9.35519	0	0.045	3.37785e-117
MYPN	1.31651e-54	-7.95525	0	0.02	2.13893e-50
TNNC1	0	-7.73375	0.002	0.134	0
ANK1	2.70167e-33	-7.1817	0	0.012	4.3894e-29
SLN	5.31176e-47	-6.88971	0	0.018	8.63002e-43
TMEM38B	8.12901e-47	-6.76465	0	0.017	1.32072e-42
KCNK2	1.60707e-26	-6.75942	0	0.01	2.611e-22
CDK18	3.84348e-43	-6.70055	0	0.016	6.2445e-39
TNNT1	0	-6.6869	0.003	0.125	0
CDKN1A	1.80186e-39	-6.57507	0	0.015	2.92749e-35
TRDN	3.10322e-69	-6.55796	0	0.026	5.04181e-65
TEAD4	2.97162e-35	-6.34979	0	0.013	4.82799e-31
RIPOR2	4.53238e-35	-6.32165	0	0.013	7.36376e-31
TNFRSF11B	2.52963e-32	-6.32165	0	0.012	4.10989e-28
RAPSN	7.3886e-31	-6.11586	0	0.011	1.20043e-26
MYOZ2	2.02828e-88	-5.98443	0.001	0.034	3.29535e-84
RASSF4	1.53107e-50	-5.72909	0	0.02	2.48753e-46
BCAM	4.36782e-60	-5.72858	0	0.023	7.0964e-56
CACNA1S	2.38308e-29	-5.64139	0	0.011	3.87179e-25
RBM24	1.56277e-35	-5.5675	0	0.014	2.53903e-31
PYGL	1.56795e-29	-5.50397	0	0.011	2.54745e-25
FMN1	6.5682e-42	-5.48976	0	0.016	1.06714e-37
ANKRD1	2.462e-259	-5.17151	0.005	0.105	4.00002e-255
CTAG2	7.32418e-40	-5.08355	0	0.016	1.18996e-35
ENO3	4.79223e-125	-5.03836	0.002	0.052	7.78593e-121
EYA1	7.67354e-32	-5.02008	0	0.013	1.24672e-27
ATRNL1	5.03015e-26	-4.91051	0	0.01	8.17249e-22
TMEM182	2.44372e-101	-4.73272	0.002	0.043	3.97031e-97
RNF17	5.57277e-38	-4.44762	0.001	0.016	9.05407e-34
ARPP21	3.99947e-100	-4.35513	0.003	0.044	6.49793e-96
CAVIN4	1.72956e-86	-4.17129	0.003	0.038	2.81001e-82
SYNPO2	5.34948e-103	-3.86946	0.004	0.049	8.6913e-99
SGCZ	5.58225e-48	-3.76027	0.002	0.022	9.06949e-44
FLNC	5.8121e-102	-3.7068	0.005	0.049	9.44292e-98
APOE	1.83138e-103	-3.59078	0.005	0.051	2.97545e-99
STAC3	5.6635e-43	-3.40174	0.002	0.021	9.20148e-39
OBSCN	2.95193e-42	-3.31455	0.002	0.021	4.796e-38
CAVIN2	6.07711e-31	-3.01617	0.002	0.016	9.87348e-27
DNAJA4	5.89479e-34	-2.97709	0.002	0.018	9.57727e-30
TNFRSF21	9.21329e-29	-2.95844	0.002	0.016	1.49688e-24
CYB5R1	4.42466e-92	-2.89619	0.009	0.055	7.18875e-88
BIN1	3.9007e-156	-2.71197	0.024	0.107	6.33747e-152
NES	1.60391e-215	-2.59952	0.057	0.18	2.60588e-211
BGLAP	2.4417e-22	-2.5711	0.002	0.013	3.96703e-18
MYOM3	6.30332e-17	-2.54635	0.002	0.01	1.0241e-12
PEG10	1.12673e-36	-2.52662	0.004	0.023	1.83059e-32
NAV3	2.60316e-19	-2.49508	0.002	0.011	4.22936e-15
NPNT	1.20356e-98	-2.43606	0.019	0.076	1.95542e-94
GFRA1	1.25328e-17	-2.43481	0.002	0.011	2.0362e-13
GYS1	9.22515e-23	-2.42046	0.003	0.015	1.49881e-18
PKIA	8.66669e-17	-2.29759	0.002	0.011	1.40808e-12
FAM49B	6.26676e-17	-2.27685	0.003	0.011	1.01816e-12
DES	1.6914e-286	-2.2668	0.033	0.172	2.74802e-282
GPSM2	5.64449e-26	-2.26069	0.004	0.018	9.1706e-22
PVR	8.69959e-19	-2.25479	0.003	0.013	1.41342e-14
DCLK1	8.01705e-62	-2.25294	0.012	0.048	1.30253e-57
GADD45A	1.73927e-36	-2.20726	0.006	0.026	2.82579e-32
EGFLAM	1.18242e-30	-2.1812	0.005	0.022	1.92107e-26
CDK5R1	1.14012e-13	-2.10431	0.002	0.01	1.85236e-09
MYL12A	3.20681e-25	-2.08973	0.006	0.021	5.2101e-21
FXYD1	4.28096e-15	-2.07807	0.003	0.011	6.95527e-11
MYL6B	9.49489e-50	-2.06296	0.012	0.042	1.54263e-45
MCAM	1.76081e-18	-2.03806	0.003	0.014	2.86078e-14
MAP3K7CL	1.23201e-66	-2.03583	0.023	0.068	2.00165e-62
RAB15	4.59208e-15	-2.02747	0.003	0.011	7.46075e-11
SLC9A7	2.06544e-15	-1.96906	0.003	0.012	3.35572e-11
COL5A3	7.86588e-117	-1.95781	0.032	0.105	1.27797e-112
CCDC9B	9.52854e-19	-1.88139	0.004	0.015	1.5481e-14
OLFML2A	9.63106e-60	-1.87924	0.017	0.056	1.56476e-55
LMO7	2.98302e-57	-1.86616	0.021	0.06	4.84651e-53
SEMA6C	7.39084e-15	-1.83665	0.004	0.013	1.20079e-10
PRUNE2	1.75965e-61	-1.79208	0.03	0.076	2.8589e-57
ACTN2	8.28328e-13	-1.78903	0.004	0.011	1.34578e-08
SGCA	3.39695e-19	-1.78733	0.006	0.019	5.51903e-15
MRAS	1.14897e-21	-1.78573	0.006	0.019	1.86674e-17
FADS3	4.53458e-21	-1.76887	0.006	0.019	7.36734e-17
CHRNB1	2.94614e-14	-1.76155	0.004	0.013	4.78659e-10
PPL	6.56936e-20	-1.75824	0.006	0.019	1.06732e-15
FILIP1	4.27554e-13	-1.74791	0.004	0.012	6.94646e-09
GGH	4.53904e-11	-1.74243	0.003	0.01	7.37458e-07
FOXO6	2.21471e-13	-1.71641	0.004	0.012	3.59824e-09
TXLNB	1.16772e-12	-1.71579	0.004	0.012	1.8972e-08
TSPAN7	2.2631e-11	-1.69936	0.004	0.011	3.67685e-07
WDR44	3.13564e-10	-1.5641	0.004	0.01	5.09447e-06
ASAH1	1.04264e-13	-1.55584	0.005	0.014	1.69397e-09
TMEM64	1.42005e-34	-1.53934	0.018	0.045	2.30716e-30
PDLIM3	5.87976e-13	-1.47821	0.006	0.016	9.55285e-09
GPC1	4.18073e-45	-1.40967	0.047	0.09	6.79244e-41
COLEC12	5.68137e-37	-1.4078	0.021	0.05	9.23052e-33
SORT1	7.82331e-23	-1.38374	0.014	0.033	1.27105e-18
NDST4	5.82303e-36	-1.36141	0.022	0.052	9.46068e-32
LRRC17	2.22743e-32	-1.3598	0.02	0.047	3.6189e-28
MMP11	3.0923e-10	-1.35544	0.004	0.01	5.02406e-06
IFIT1	1.1776e-09	-1.34261	0.004	0.011	1.91324e-05
ADAMTS15	3.99582e-14	-1.31985	0.008	0.019	6.49201e-10
SNRPN	2.28126e-18	-1.31781	0.01	0.024	3.70637e-14
CAMK2D	3.94956e-23	-1.31584	0.014	0.033	6.41685e-19
AADAT	4.30475e-09	-1.29962	0.004	0.01	6.99394e-05
ALDH1B1	2.02132e-17	-1.28098	0.012	0.026	3.28403e-13
NNMT	1.27358e-29	-1.259	0.031	0.06	2.06919e-25
SLIRP	1.43614e-08	-1.2514	0.004	0.01	0.000233329
NOTCH3	2.44691e-30	-1.24286	0.022	0.048	3.9755e-26
CILP	2.22036e-22	-1.23118	0.015	0.033	3.60742e-18
PLAT	4.23132e-14	-1.20971	0.009	0.02	6.87463e-10
VASH2	7.99763e-17	-1.19018	0.012	0.026	1.29938e-12
LIFR	1.19154e-22	-1.1774	0.017	0.037	1.9359e-18
BABAM2	1.28375e-11	-1.1735	0.009	0.019	2.08572e-07
CACNB1	1.03122e-18	-1.17123	0.015	0.032	1.67543e-14
RGMB	1.34739e-50	-1.16503	0.058	0.108	2.1891e-46
AKAP6	1.11676e-09	-1.15667	0.004	0.011	1.81441e-05
SEPTIN9	3.70479e-16	-1.14534	0.015	0.031	6.01917e-12
GRASP	2.22272e-07	-1.14227	0.006	0.012	0.00361125
PLAU	7.46965e-23	-1.13949	0.023	0.045	1.21359e-18
THSD1	3.06206e-09	-1.13573	0.007	0.015	4.97493e-05
GAMT	4.56789e-07	-1.11692	0.005	0.011	0.00742146
PLD1	1.28732e-07	-1.08019	0.006	0.012	0.0020915
CFL2	5.27456e-35	-1.07384	0.034	0.068	8.56958e-31
PAAF1	3.70248e-07	-1.0549	0.006	0.012	0.00601543
FLRT2	2.52913e-18	-1.04758	0.02	0.039	4.10908e-14
ISG15	2.27924e-10	-1.0453	0.01	0.02	3.70308e-06
ATP1A2	1.04399e-10	-1.04406	0.007	0.015	1.69617e-06
ALDH1A2	8.69598e-14	-1.02786	0.015	0.028	1.41284e-09
TSPAN9	5.3361e-40	-1.02209	0.056	0.1	8.66957e-36
GRID2	9.44529e-11	-1.0194	0.012	0.023	1.53458e-06
MAP1B	8.14904e-23	1.00431	0.052	0.029	1.32397e-18
NAB2	2.40925e-07	1.00732	0.013	0.007	0.00391432
SH3BGRL3	6.18222e-24	1.01122	0.086	0.055	1.00442e-19
ENO1	6.02942e-08	1.0135	0.012	0.006	0.0009796
C3orf70	1.15323e-07	1.0161	0.013	0.007	0.00187365
DGKH	5.17066e-06	1.01699	0.011	0.006	0.0840077
ANKZF1	6.02458e-07	1.02022	0.012	0.006	0.00978814
IGFBP7	6.45032e-47	1.02758	0.144	0.09	1.04798e-42
WIPI1	1.36691e-06	1.02816	0.01	0.005	0.0222083
MAP3K6	5.82293e-13	1.03521	0.02	0.01	9.46052e-09
NDRG3	3.04013e-13	1.03661	0.022	0.011	4.9393e-09
CDH13	2.24921e-16	1.03729	0.04	0.023	3.65429e-12
MIF4GD	1.10683e-06	1.04103	0.01	0.005	0.0179826
LATS2	4.34718e-10	1.04271	0.016	0.008	7.06286e-06
ID1	4.30354e-09	1.04301	0.014	0.007	6.99196e-05
PWWP2A	1.40646e-11	1.04559	0.018	0.009	2.28507e-07
SKIL	6.67983e-24	1.04771	0.048	0.025	1.08527e-19
AKR1C3	3.92147e-14	1.04807	0.029	0.015	6.37122e-10
FAM219A	5.31217e-07	1.05392	0.011	0.005	0.00863068
G0S2	1.97641e-13	1.05645	0.025	0.013	3.21107e-09
EFCC1	5.02195e-19	1.0634	0.035	0.017	8.15916e-15
DNAJC1	1.82152e-10	1.06495	0.018	0.009	2.95942e-06
SLC9A1	1.88701e-07	1.06688	0.012	0.006	0.00306582
PTGIR	6.50468e-07	1.06815	0.011	0.006	0.0105682
BGN	4.26113e-52	1.06818	0.163	0.104	6.92306e-48
FAM131A	3.57843e-07	1.07251	0.011	0.005	0.00581387
IER5L	2.5688e-20	1.07392	0.037	0.019	4.17354e-16
ENAH	8.13979e-28	1.07655	0.069	0.039	1.32247e-23
FAM102A	1.15868e-06	1.08045	0.01	0.005	0.018825
ARPC1B	2.24193e-16	1.08438	0.032	0.017	3.64246e-12
ERCC6	7.41689e-13	1.08664	0.02	0.01	1.20502e-08
FILIP1L	1.60819e-17	1.08705	0.029	0.014	2.61282e-13
TOR1B	1.72307e-08	1.0872	0.013	0.007	0.000279948
TNFSF13	1.18153e-12	1.08862	0.019	0.009	1.91963e-08
TSPO	4.17031e-26	1.09118	0.054	0.028	6.7755e-22
ROGDI	3.37054e-08	1.09632	0.011	0.005	0.000547612
ITGB5	1.36456e-08	1.09644	0.013	0.006	0.0002217
PLEKHG4	6.61764e-10	1.10515	0.015	0.008	1.07517e-05
MRAP2	3.41928e-09	1.10624	0.013	0.006	5.5553e-05
SNCAIP	1.06911e-14	1.11471	0.023	0.011	1.73698e-10
KLF2	2.01213e-14	1.11787	0.023	0.011	3.26911e-10
DSE	8.11702e-18	1.11854	0.033	0.016	1.31877e-13
GALNT1	1.61904e-17	1.12176	0.034	0.018	2.63046e-13
FOXD1	1.35408e-08	1.12306	0.013	0.006	0.000219998
MFGE8	1.7313e-88	1.12729	0.172	0.092	2.81284e-84
SYDE2	1.16487e-09	1.13016	0.013	0.006	1.89256e-05
LTBP1	7.74779e-33	1.13054	0.057	0.028	1.25878e-28
KERA	4.89653e-19	1.13686	0.03	0.014	7.95539e-15
ARHGAP29	2.14005e-07	1.14181	0.01	0.005	0.00347695
ARHGAP31	1.01113e-09	1.14498	0.014	0.006	1.64279e-05
JUN	2.31964e-21	1.1487	0.038	0.019	3.76871e-17
ETV4	5.52478e-08	1.15076	0.012	0.006	0.00089761
RAI14	1.00573e-14	1.15405	0.024	0.012	1.63401e-10
JCAD	4.69392e-07	1.15751	0.01	0.004	0.00762621
ABCC1	4.33044e-14	1.16818	0.02	0.009	7.03567e-10
ID4	1.02036e-12	1.184	0.019	0.009	1.65778e-08
HK1	2.48757e-08	1.18506	0.011	0.005	0.000404156
SLC20A1	5.00804e-25	1.18522	0.052	0.028	8.13656e-21
GABRE	1.36851e-15	1.1861	0.023	0.01	2.22342e-11
GRK5	1.68386e-11	1.18676	0.016	0.007	2.73576e-07
TUBA4A	1.34044e-07	1.18725	0.012	0.006	0.00217781
ACTA2	1.47105e-16	1.19295	0.027	0.013	2.39001e-12
ELOVL1	1.12696e-11	1.19337	0.015	0.007	1.83097e-07
ACOT7	3.23816e-10	1.19473	0.013	0.006	5.26104e-06
TALDO1	1.47304e-19	1.1973	0.028	0.013	2.39326e-15
NINJ1	1.40657e-08	1.19791	0.011	0.005	0.000228525
TMOD2	7.23496e-08	1.19791	0.01	0.005	0.00117546
TSC22D3	3.2033e-16	1.20201	0.023	0.011	5.2044e-12
TPM4	1.20218e-34	1.20651	0.067	0.034	1.95318e-30
ANKH	7.16166e-31	1.20689	0.047	0.022	1.16356e-26
FURIN	2.62702e-07	1.20689	0.01	0.005	0.00426811
CYTH1	5.7839e-19	1.21868	0.026	0.011	9.39711e-15
CLK3	6.79433e-13	1.21993	0.017	0.007	1.10388e-08
EPHA4	8.69032e-13	1.22043	0.017	0.008	1.41192e-08
CDKN2B	2.26057e-24	1.22634	0.037	0.017	3.67275e-20
CDR2L	3.20512e-10	1.22958	0.013	0.006	5.20735e-06
KIAA1211	9.58204e-08	1.22991	0.01	0.005	0.00155679
TAGLN	2.46051e-128	1.24284	0.193	0.092	3.9976e-124
NBL1	1.1173e-56	1.2549	0.087	0.04	1.81527e-52
NPC1	2.38585e-08	1.26247	0.011	0.005	0.000387629
DAB2IP	1.62783e-12	1.26613	0.016	0.007	2.64473e-08
FAP	2.11544e-34	1.26931	0.047	0.02	3.43696e-30
FOXP4	5.17609e-09	1.28286	0.011	0.005	8.4096e-05
RNF19B	5.15395e-14	1.28501	0.019	0.008	8.37362e-10
ADM	4.38761e-10	1.29214	0.012	0.005	7.12855e-06
NXT2	2.41806e-13	1.29455	0.016	0.007	3.92863e-09
MKNK2	1.14459e-12	1.29824	0.018	0.008	1.85961e-08
PTHLH	4.94809e-17	1.30494	0.022	0.009	8.03917e-13
ITGA10	8.27316e-13	1.31109	0.015	0.006	1.34414e-08
SPOCK1	2.89385e-22	1.31889	0.031	0.013	4.70163e-18
PCDHB6	8.0411e-12	1.32683	0.013	0.005	1.30644e-07
INMT	1.83951e-21	1.33531	0.026	0.01	2.98865e-17
TIMP3	6.88367e-12	1.34022	0.014	0.006	1.11839e-07
ZNF219	7.17061e-23	1.34395	0.027	0.011	1.16501e-18
SAMD11	6.28005e-18	1.36648	0.02	0.008	1.02032e-13
SH3BP4	7.98173e-11	1.37244	0.012	0.005	1.29679e-06
NR2F1	8.14612e-22	1.37559	0.025	0.01	1.3235e-17
TAGLN2	7.79311e-16	1.37621	0.019	0.008	1.26615e-11
SHB	1.4568e-11	1.37738	0.013	0.006	2.36687e-07
DGKB	9.36775e-16	1.38976	0.019	0.008	1.52198e-11
TSKU	3.24466e-14	1.39439	0.016	0.007	5.2716e-10
LOXL1	1.50513e-106	1.39589	0.193	0.103	2.44538e-102
G6PD	1.321e-26	1.39812	0.03	0.012	2.14623e-22
RDH10	1.56178e-11	1.39852	0.013	0.005	2.53742e-07
RFLNB	2.73241e-14	1.40053	0.017	0.007	4.43934e-10
SERPINE1	2.82473e-36	1.41535	0.044	0.018	4.58934e-32
CHST11	5.62685e-13	1.42103	0.013	0.005	9.14194e-09
RARRES2	3.77242e-09	1.42344	0.01	0.004	6.12904e-05
SERINC5	3.2944e-10	1.42588	0.01	0.004	5.35241e-06
CAB39L	7.61144e-15	1.42674	0.016	0.006	1.23663e-10
MFAP4	2.59436e-90	1.42894	0.139	0.066	4.21506e-86
AGO1	7.92487e-17	1.43369	0.018	0.007	1.28755e-12
GAS6	2.28194e-26	1.43926	0.031	0.013	3.70747e-22
MFAP2	3.87914e-89	1.43969	0.128	0.059	6.30243e-85
FMNL3	8.79728e-13	1.44293	0.014	0.006	1.42929e-08
FLNB	1.28605e-19	1.44959	0.022	0.009	2.08944e-15
LBH	7.5615e-18	1.46323	0.018	0.007	1.22852e-13
STK38L	3.76737e-14	1.48489	0.014	0.005	6.12085e-10
C11orf96	2.3785e-15	1.48673	0.016	0.006	3.86434e-11
NAAA	5.49194e-13	1.51183	0.012	0.004	8.92275e-09
CMKLR1	8.50958e-17	1.51705	0.017	0.006	1.38255e-12
CAPG	6.37799e-27	1.51843	0.028	0.01	1.03623e-22
BHLHE40	1.2918e-57	1.52058	0.077	0.033	2.09879e-53
SORBS2	8.24975e-12	1.52949	0.011	0.004	1.34034e-07
COL8A1	1.9378e-67	1.53011	0.078	0.031	3.14835e-63
GALNT10	1.38777e-34	1.53722	0.036	0.013	2.2547e-30
SYT11	1.02676e-18	1.55221	0.017	0.006	1.66818e-14
SPSB1	1.96165e-14	1.59016	0.013	0.004	3.18708e-10
ELN	8.96003e-122	1.62387	0.178	0.085	1.45574e-117
DKK2	5.73493e-15	1.63133	0.015	0.005	9.31754e-11
LRP8	2.37731e-11	1.63478	0.01	0.003	3.86242e-07
FAM180A	1.43115e-15	1.63646	0.014	0.005	2.32519e-11
JUNB	2.46082e-17	1.65282	0.015	0.005	3.99809e-13
DUSP23	1.0924e-12	1.67586	0.01	0.003	1.77482e-08
IRS2	2.13911e-24	1.70864	0.022	0.007	3.47542e-20
ASPN	2.84198e-61	1.78626	0.055	0.018	4.61737e-57
SUGCT	1.37676e-22	1.80152	0.019	0.006	2.23682e-18
PDGFC	3.99496e-18	1.80642	0.015	0.005	6.49061e-14
LIMS2	3.12429e-17	1.80848	0.014	0.004	5.07603e-13
FN1	1.27637e-155	1.83324	0.215	0.103	2.07371e-151
SPON1	1.36006e-48	1.84568	0.041	0.013	2.20969e-44
SFI1	9.04292e-14	1.86808	0.01	0.003	1.4692e-09
KIAA0355	9.22164e-14	1.86853	0.01	0.003	1.49824e-09
LEPR	1.119e-15	1.88788	0.011	0.003	1.81803e-11
RCAN2	6.24227e-15	1.89136	0.01	0.003	1.01418e-10
LDLR	1.55064e-14	1.917	0.011	0.003	2.51933e-10
MAFB	9.8626e-15	1.92971	0.011	0.003	1.60238e-10
ATP2A1	1.08736e-22	1.93446	0.05	0.027	1.76664e-18
BASP1	4.32533e-14	1.99258	0.01	0.003	7.02736e-10
RAB32	2.23013e-15	2.01943	0.01	0.003	3.62329e-11
TRAF1	4.08654e-24	2.02731	0.017	0.004	6.6394e-20
CCN2	5.93408e-228	2.04186	0.173	0.052	9.64109e-224
KCNMA1	1.26027e-18	2.09326	0.012	0.003	2.04756e-14
PNPLA7	1.12556e-21	2.12659	0.014	0.003	1.8287e-17
SCD	1.57311e-26	2.17482	0.018	0.004	2.55583e-22
THBS4	7.40768e-55	2.22077	0.037	0.009	1.20353e-50
UCHL1	3.01903e-62	2.27121	0.044	0.011	4.90501e-58
PODXL	7.27134e-51	2.38107	0.033	0.008	1.18137e-46
LCP1	1.21974e-40	2.42339	0.025	0.006	1.98172e-36
PLK3	1.34415e-21	2.4453	0.012	0.002	2.18384e-17
GPX3	2.7724e-35	2.45638	0.02	0.004	4.50431e-31
TSPAN2	7.19646e-23	2.45936	0.012	0.002	1.16921e-18
CYTL1	9.65282e-34	2.47703	0.018	0.003	1.56829e-29
HIF3A	3.72161e-34	2.48354	0.018	0.003	6.0465e-30
TES	9.44062e-45	2.48409	0.025	0.005	1.53382e-40
ENC1	1.2429e-56	2.51655	0.034	0.007	2.01934e-52
FIBIN	2.89559e-64	2.51993	0.035	0.006	4.70447e-60
SMAD7	9.00353e-21	2.56915	0.01	0.002	1.4628e-16
AQP1	1.75615e-90	2.60916	0.06	0.014	2.85321e-86
POSTN	2.88367e-103	2.62753	0.06	0.012	4.68509e-99
TMEM59L	1.84914e-19	2.67286	0.01	0.002	3.00429e-15
RARRES1	2.35019e-24	2.79261	0.011	0.002	3.81836e-20
CREB5	4.92679e-21	2.79489	0.01	0.001	8.00455e-17
PDGFD	8.10988e-33	2.87016	0.015	0.002	1.31761e-28
UNC5B	4.24056e-34	2.91943	0.016	0.002	6.88963e-30
SFRP1	2.00636e-30	2.94613	0.014	0.002	3.25973e-26
SYNPO	3.98361e-27	2.94722	0.012	0.002	6.47217e-23
CXCL14	2.67778e-79	2.96116	0.045	0.009	4.35058e-75
CCN4	5.42793e-41	2.96276	0.019	0.003	8.81875e-37
PCOLCE2	4.17804e-29	3.03266	0.013	0.002	6.78806e-25
VEGFC	4.51005e-29	3.07575	0.013	0.002	7.32748e-25
LMCD1	1.23085e-32	3.17129	0.014	0.002	1.99976e-28
GFPT2	1.48352e-39	3.19307	0.017	0.002	2.41028e-35
MICAL2	8.02474e-104	3.90787	0.041	0.003	1.30378e-99
CD70	1.25413e-46	4.1785	0.017	0.001	2.03759e-42
COMP	1.46058e-125	4.43277	0.046	0.003	2.373e-121
LRRC32	2.19616e-30	4.72156	0.01	0	3.5681e-26
TNFAIP6	1.60991e-120	4.81579	0.043	0.002	2.61562e-116
RGCC	5.08262e-47	5.06163	0.016	0	8.25773e-43
ANO1	1.16596e-37	5.20983	0.012	0	1.89434e-33
CDA	1.17387e-31	5.26186	0.01	0	1.90718e-27
DHCR24	2.2317e-33	5.73026	0.011	0	3.62585e-29
ANPEP	1.04304e-38	5.95553	0.012	0	1.69463e-34
SPECC1	1.19769e-31	6.17055	0.01	0	1.94589e-27
LRRC15	3.50856e-32	6.2491	0.01	0	5.70035e-28
PRR5L	4.09917e-35	6.32359	0.011	0	6.65992e-31
NEDD9	1.3979e-38	6.44297	0.012	0	2.27116e-34
CCL5	7.55271e-39	6.55323	0.012	0	1.22709e-34
SLC7A11	7.39301e-47	6.75128	0.015	0	1.20114e-42
COL8A2	4.46489e-54	6.9254	0.017	0	7.25411e-50
CEMIP	2.21612e-62	7.2863	0.019	0	3.60053e-58
ADAMTS10	8.44659e-40	7.40422	0.012	0	1.37232e-35
WNT5B	9.76785e-43	7.54674	0.013	0	1.58698e-38
PRG4	4.60223e-65	7.566	0.02	0	7.47725e-61
SLC12A8	1.77816e-46	7.69186	0.014	0	2.88898e-42
CES1	1.73893e-50	7.80963	0.015	0	2.82524e-46
NEFL	2.32924e-34	10.6631	0.01	0	3.78431e-30
HAS1	9.17915e-41	10.8353	0.012	0	1.49134e-36
ARNTL2	6.78119e-39	10.8353	0.012	0	1.10174e-34
MMP28	6.78119e-39	10.8353	0.012	0	1.10174e-34
ADAMTS16	4.52483e-57	11.5094	0.017	0	7.3515e-53

## Sheet: Table S5 3D P-myo Ct vs PQ
	p_val	avg_log2FC	pct.1	pct.2	p_val_adj		Total	up	down
PAPPA2	2.57e-41	-11.1619	0	0.027	4.17e-37		1714	73	1641
STAMBPL1	1.15e-21	-9.83484	0	0.013	1.86e-17
PPP4R4	1.34e-19	-9.79746	0	0.012	2.17e-15
GAL3ST3	1.34e-19	-9.79746	0	0.012	2.17e-15
CHDH	4.07e-20	-9.71967	0	0.012	6.61e-16
C1QTNF4	1.34e-19	-9.67914	0	0.012	2.17e-15
FAAH	1.45e-18	-9.67914	0	0.011	2.35e-14
ZNF181	4.4e-19	-9.63744	0	0.012	7.15e-15
NPW	4.76e-18	-9.55024	0	0.011	7.73e-14
PTGES	1.56e-17	-9.55024	0	0.011	2.54e-13
GRIK3	1.7e-16	-9.55024	0	0.01	2.75e-12
POU5F2	5.15e-17	-9.45743	0	0.01	8.37e-13
FBXO36	1.7e-16	-9.40869	0	0.01	2.75e-12
NRCAM	1.7e-16	-9.40869	0	0.01	2.75e-12
NAGS	5.58e-16	-9.35824	0	0.01	9.07e-12
FOS	1.62e-90	-9.23656	0	0.06	2.64e-86
ALG11	9.7e-21	-6.3754	0	0.013	1.58e-16
ZNF74	1.04e-19	-6.3754	0	0.013	1.7e-15
CD28	1.21e-17	-6.13507	0	0.011	1.97e-13
ALOX5	1.31e-16	-6.09081	0	0.011	2.13e-12
ZBED6CL	4.3e-16	-6.09081	0	0.01	6.99e-12
NUDT17	1.31e-16	-6.04515	0	0.011	2.13e-12
FIGNL1	4.31e-16	-5.998	0	0.01	7e-12
SMG8	4.31e-16	-5.998	0	0.01	7e-12
TFAP2E	1.42e-15	-5.94925	0	0.01	2.3e-11
TUBA1B	1.47e-26	-5.9374	0	0.018	2.39e-22
BOLA1	4.65e-15	-5.89881	0	0.01	7.56e-11
MYOZ3	4.65e-15	-5.89881	0	0.01	7.56e-11
TMEM106C	4.65e-15	-5.89881	0	0.01	7.56e-11
ZNF600	4.65e-15	-5.89881	0	0.01	7.56e-11
PUS10	2.39e-19	-5.44252	0	0.013	3.89e-15
NIPA1	8.35e-18	-5.40514	0	0.012	1.36e-13
KAZALD1	8.36e-18	-5.32735	0	0.012	1.36e-13
AHCY	2.74e-17	-5.24512	0	0.012	4.44e-13
CENPQ	2.92e-16	-5.15792	0	0.011	4.75e-12
PLK5	2.92e-16	-5.15792	0	0.011	4.75e-12
SHQ1	3.11e-15	-5.15792	0	0.01	5.06e-11
AMH	9.54e-16	-5.11226	0	0.011	1.55e-11
ZNF684	1.02e-14	-5.06511	0	0.01	1.65e-10
FIZ1	3.32e-14	-4.96592	0	0.01	5.4e-10
ZNF829	2.07e-13	-4.40404	0	0.01	3.36e-09
MAGOHB	5.23e-19	-4.40001	0.001	0.014	8.5e-15
DEFB124	8.49e-21	-4.37256	0.001	0.016	1.38e-16
HPSE2	4.47e-69	-4.35849	0.003	0.057	7.26e-65
MINDY4	3.29e-16	-4.32159	0.001	0.012	5.35e-12
NKRF	3.4e-15	-4.23695	0.001	0.011	5.52e-11
DERL3	8.55e-21	-4.23265	0.001	0.016	1.39e-16
DMKN	2.76e-19	-4.20297	0.001	0.015	4.48e-15
TNFRSF6B	3.48e-14	-4.19269	0.001	0.011	5.65e-10
PCDHGB2	5.49e-17	-4.16241	0.001	0.013	8.92e-13
VTA1	1.11e-13	-4.14703	0.001	0.01	1.81e-09
DRC3	1.77e-15	-4.00671	0.001	0.012	2.88e-11
POP1	1.13e-12	-4.00068	0.001	0.01	1.84e-08
TRPS1	1.7e-24	-3.84405	0.001	0.021	2.77e-20
PNMA8B	1.78e-13	-3.83216	0.001	0.011	2.9e-09
DUSP15	1.76e-12	-3.83216	0.001	0.01	2.86e-08
IKZF4	2.15e-19	-3.82354	0.001	0.016	3.5e-15
FAT3	4.34e-17	-3.75706	0.001	0.014	7.05e-13
ARHGAP28	1.79e-15	-3.7484	0.001	0.012	2.91e-11
RGS22	5.54e-12	-3.68581	0.001	0.01	9.01e-08
ZFP69	1.86e-15	-3.6355	0.001	0.013	3.02e-11
DPYSL4	3.93e-14	-3.60934	0.001	0.012	6.38e-10
ASTE1	9.29e-21	-3.5834	0.002	0.019	1.51e-16
RASGEF1B	1.27e-14	-3.56992	0.001	0.012	2.07e-10
ADGRD1	4.47e-19	-3.56278	0.001	0.017	7.26e-15
LMNB1	2.71e-16	-3.533	0.001	0.014	4.41e-12
EIF3E	3.94e-14	-3.52939	0.001	0.012	6.41e-10
PPFIA2	5.59e-18	-3.50888	0.002	0.017	9.08e-14
FANCB	5.77e-15	-3.45761	0.001	0.013	9.37e-11
LAMC3	1.9e-46	-3.44587	0.004	0.044	3.09e-42
SRPK3	2.44e-11	-3.4275	0.001	0.01	3.97e-07
FCGR2A	1.15e-12	-3.40049	0.001	0.011	1.86e-08
PRSS12	2.23e-21	-3.37557	0.002	0.021	3.62e-17
AHCTF1	3.51e-12	-3.35483	0.001	0.011	5.7e-08
CHEK2	7.74e-15	-3.32704	0.001	0.013	1.26e-10
ROBO2	1.03e-18	-3.2963	0.002	0.018	1.67e-14
KCNK3	1.89e-12	-3.28966	0.001	0.012	3.07e-08
MFSD13A	2.56e-15	-3.28328	0.001	0.014	4.16e-11
UBXN11	3.24e-11	-3.25894	0.001	0.01	5.26e-07
ING3	3.24e-11	-3.25894	0.001	0.01	5.26e-07
DTX1	3.24e-11	-3.25894	0.001	0.01	5.26e-07
SFRP4	0	-3.24647	0.105	0.54	0
WNT2	1.71e-15	-3.24453	0.002	0.015	2.77e-11
EID3	2.98e-14	-3.21306	0.001	0.013	4.85e-10
ZNF586	6.37e-13	-3.21187	0.001	0.012	1.03e-08
SUGP1	9.79e-11	-3.20849	0.001	0.01	1.59e-06
PCDHB14	4.17e-15	-3.18094	0.002	0.014	6.78e-11
EFCAB13	1.37e-11	-3.16473	0.001	0.011	2.22e-07
ZCCHC12	1.57e-101	-3.14465	0.014	0.11	2.55e-97
EGFLAM	4.1e-21	-3.13548	0.003	0.022	6.66e-17
ABCE1	1.73e-15	-3.12193	0.002	0.015	2.8e-11
EGR2	1.49e-14	-3.08958	0.002	0.014	2.43e-10
PIANP	5.66e-12	-3.0867	0.001	0.011	9.2e-08
LAIR1	1.08e-13	-3.07685	0.002	0.013	1.76e-09
COMMD8	7.06e-16	-3.06997	0.002	0.016	1.15e-11
LRRC61	1.21e-10	-3.06884	0.001	0.01	1.97e-06
ZIM2	1.21e-10	-3.06884	0.001	0.01	1.97e-06
COMP	8.18e-17	-3.06489	0.002	0.017	1.33e-12
STRA6	1.4e-23	-3.0533	0.003	0.025	2.28e-19
RASD1	5.13e-15	-3.05293	0.002	0.015	8.33e-11
SDK1	1.92e-24	-3.04296	0.004	0.027	3.12e-20
ELOVL4	1.09e-13	-3.04042	0.002	0.013	1.77e-09
ATP8B4	1.92e-33	-3.02846	0.006	0.039	3.11e-29
FBXO24	9.85e-11	-3.01839	0.001	0.01	1.6e-06
TFB2M	3.59e-10	-3.01839	0.001	0.01	5.84e-06
ARSI	3.59e-10	-3.01839	0.001	0.01	5.84e-06
BLOC1S3	3.59e-10	-3.01839	0.001	0.01	5.84e-06
NEURL2	3.59e-10	-3.01839	0.001	0.01	5.84e-06
HPGDS	3.59e-10	-3.01839	0.001	0.01	5.84e-06
GREM1	6.72e-24	-3.01129	0.004	0.027	1.09e-19
TENM4	1.68e-21	-3.0053	0.003	0.022	2.73e-17
ITFG2	4.93e-11	-2.99679	0.001	0.011	8.01e-07
HSPA12A	1.28e-13	-2.98794	0.002	0.014	2.08e-09
ZNF669	6.78e-12	-2.97923	0.001	0.012	1.1e-07
FRRS1L	6.78e-12	-2.97923	0.001	0.012	1.1e-07
ZSWIM4	1.97e-11	-2.97923	0.001	0.011	3.21e-07
GDF7	5.2e-30	-2.97077	0.005	0.034	8.46e-26
MCOLN3	1.08e-53	-2.95449	0.009	0.062	1.75e-49
ZNF439	1.07e-12	-2.95241	0.002	0.013	1.74e-08
ZNF571	3.06e-12	-2.95241	0.002	0.013	4.98e-08
C1orf159	1.44e-10	-2.94964	0.001	0.01	2.35e-06
CCDC154	8.62e-15	-2.94546	0.002	0.016	1.4e-10
RHPN2	2.01e-14	-2.93288	0.002	0.015	3.26e-10
KATNB1	2.71e-12	-2.92525	0.002	0.012	4.41e-08
ZNF727	4.2e-13	-2.90806	0.002	0.014	6.83e-09
FANCI	5.74e-11	-2.89203	0.001	0.011	9.33e-07
ZNF584	5.74e-11	-2.89203	0.001	0.011	9.33e-07
CUBN	2.25e-11	-2.88472	0.002	0.012	3.66e-07
CYP39A1	3.08e-12	-2.87859	0.002	0.013	5.01e-08
FRK	8.78e-12	-2.87859	0.002	0.012	1.43e-07
CCDC122	5.79e-17	-2.8534	0.003	0.019	9.4e-13
DIO2	8.47e-28	-2.84889	0.004	0.031	1.38e-23
DNAH1	1.66e-10	-2.84637	0.001	0.011	2.69e-06
POLR1C	1.66e-10	-2.84637	0.001	0.011	2.69e-06
RFLNA	1.66e-10	-2.84637	0.001	0.011	2.69e-06
POLG2	3.09e-12	-2.84022	0.002	0.013	5.02e-08
CFAP58	5.03e-13	-2.83403	0.002	0.014	8.17e-09
LRRC34	6.81e-17	-2.80398	0.003	0.019	1.11e-12
B3GALNT1	4.75e-10	-2.79922	0.001	0.01	7.72e-06
ZNF43	2.51e-11	-2.76027	0.002	0.012	4.08e-07
TIMELESS	1.84e-10	-2.75582	0.002	0.011	2.99e-06
LRRC45	5.19e-10	-2.75582	0.002	0.011	8.43e-06
RIMBP2	1.35e-09	-2.75047	0.001	0.01	2.2e-05
GPLD1	3.65e-15	-2.7491	0.003	0.017	5.93e-11
PAFAH1B3	2.05e-14	-2.74152	0.002	0.015	3.33e-10
PCDHB9	5.2e-14	-2.73695	0.002	0.014	8.44e-10
DKK2	2.75e-27	-2.71491	0.005	0.031	4.47e-23
ZBTB12	7.62e-17	-2.71436	0.003	0.02	1.24e-12
SLC16A4	3.83e-09	-2.70003	0.001	0.01	6.22e-05
C16orf46	3.83e-09	-2.70003	0.001	0.01	6.22e-05
ANO5	2.08e-19	-2.68976	0.004	0.023	3.37e-15
ARHGAP25	4.16e-12	-2.68554	0.003	0.014	6.76e-08
KCNG1	6.7e-32	-2.68404	0.007	0.04	1.09e-27
MARS	1.46e-09	-2.66301	0.002	0.01	2.37e-05
PRRX2	2.73e-29	-2.65342	0.006	0.037	4.44e-25
ARMC2	1.53e-24	-2.62664	0.005	0.031	2.49e-20
ARHGEF33	1.13e-11	-2.62294	0.003	0.014	1.84e-07
SHLD3	4.07e-09	-2.61427	0.002	0.01	6.61e-05
SLC4A8	4.07e-09	-2.61427	0.002	0.01	6.61e-05
PHEX	4.07e-09	-2.61427	0.002	0.01	6.61e-05
F2RL2	1.34e-12	-2.61057	0.002	0.014	2.18e-08
MTCP1	7.15e-11	-2.60402	0.002	0.012	1.16e-06
ALDH3B1	2.1e-10	-2.60402	0.002	0.012	3.42e-06
SLC9A7	8.11e-11	-2.59643	0.002	0.013	1.32e-06
AZIN1	5.69e-13	-2.59059	0.003	0.015	9.24e-09
HECTD4	7.95e-11	-2.58011	0.002	0.012	1.29e-06
NOL11	7.95e-11	-2.58011	0.002	0.012	1.29e-06
PLCB2	2.17e-10	-2.58011	0.002	0.012	3.52e-06
WSCD2	4.13e-12	-2.57589	0.002	0.014	6.71e-08
PARPBP	1.12e-08	-2.56382	0.002	0.01	0.000182721
JMJD6	6.57e-11	-2.56108	0.002	0.011	1.07e-06
FOXL2	1.58e-12	-2.54095	0.003	0.015	2.57e-08
PRKCB	4.22e-09	-2.53857	0.002	0.01	6.86e-05
STX1B	5.47e-13	-2.52941	0.003	0.017	8.88e-09
SPINT2	1.46e-21	-2.52118	0.006	0.029	2.37e-17
EYA4	2.02e-13	-2.51794	0.004	0.018	3.29e-09
CCDC81	2.21e-10	-2.48126	0.002	0.012	3.59e-06
TRHDE	1.53e-15	-2.47955	0.004	0.021	2.48e-11
FBXO44	1.14e-11	-2.47551	0.003	0.014	1.86e-07
PIK3CD	1.6e-12	-2.46337	0.003	0.015	2.6e-08
DGKI	4.26e-12	-2.46337	0.003	0.015	6.92e-08
EDA	7.56e-14	-2.45928	0.004	0.019	1.23e-09
ZSCAN23	1.59e-09	-2.45495	0.002	0.011	2.59e-05
SFXN2	3.08e-11	-2.45342	0.003	0.014	5e-07
EEF1AKMT1	5.93e-10	-2.44073	0.002	0.012	9.64e-06
VILL	3.1e-08	-2.43937	0.002	0.01	0.000504039
PDSS2	3.1e-08	-2.43937	0.002	0.01	0.000504039
PCBP2	3.1e-08	-2.43937	0.002	0.01	0.000504039
PLA1A	4.25e-09	-2.42401	0.002	0.01	6.9e-05
NBPF3	1.15e-08	-2.42401	0.002	0.01	0.000186896
KLHDC8A	1.09e-14	-2.42011	0.004	0.02	1.77e-10
DGKB	2.83e-45	-2.41654	0.015	0.069	4.6e-41
ZNF225	4.27e-09	-2.41069	0.002	0.011	6.93e-05
DUS4L	3.91e-12	-2.40457	0.003	0.016	6.35e-08
SLC2A4	1.09e-08	-2.39903	0.002	0.011	0.000176798
TMEM187	5.86e-10	-2.38875	0.002	0.012	9.53e-06
TMEM216	1e-14	-2.38545	0.004	0.02	1.63e-10
GNRH1	2.22e-13	-2.36924	0.003	0.017	3.6e-09
TMEM79	1.13e-08	-2.36503	0.002	0.011	0.000183749
PSTK	2.96e-08	-2.36503	0.002	0.01	0.000481355
GRIP2	2.08e-13	-2.36349	0.004	0.018	3.38e-09
ZNF169	1.54e-09	-2.34822	0.002	0.012	2.51e-05
TIAF1	3.94e-12	-2.3458	0.003	0.016	6.41e-08
TMBIM6	1.48e-09	-2.34123	0.003	0.012	2.41e-05
C7orf31	9.76e-09	-2.34123	0.003	0.012	0.000158599
NPNT	2.2e-82	-2.33408	0.028	0.127	3.57e-78
ADPRM	3.31e-12	-2.33175	0.004	0.017	5.38e-08
NPAS3	7.82e-11	-2.32938	0.003	0.014	1.27e-06
TNFRSF10D	2.02e-10	-2.32938	0.003	0.014	3.29e-06
HECW1	2.97e-08	-2.31788	0.002	0.01	0.000482716
PPP2R1A	2.97e-08	-2.31788	0.002	0.01	0.000482716
GCAT	1.09e-08	-2.31184	0.002	0.011	0.000177849
CES1	7.18e-73	-2.29641	0.024	0.112	1.17e-68
MB21D2	3.76e-15	-2.29169	0.004	0.021	6.11e-11
PGM3	7.09e-11	-2.28735	0.003	0.015	1.15e-06
CCDC120	5.46e-13	-2.27352	0.004	0.018	8.87e-09
PEX5	1.06e-12	-2.27178	0.004	0.019	1.72e-08
TRIM9	9.39e-11	-2.27178	0.004	0.017	1.52e-06
NXNL2	7.73e-08	-2.26913	0.002	0.01	0.00125562
F10	7.2e-13	-2.26463	0.005	0.02	1.17e-08
IPCEF1	3.85e-09	-2.26129	0.003	0.012	6.25e-05
ARNTL	3.85e-09	-2.26129	0.003	0.012	6.25e-05
TMEM238	9.82e-09	-2.26129	0.003	0.012	0.000159605
TACC3	2.48e-08	-2.26129	0.003	0.011	0.000403642
CSKMT	4.91e-10	-2.25575	0.003	0.014	7.97e-06
DSCC1	4.25e-13	-2.24673	0.004	0.019	6.91e-09
SMIM3	3.12e-12	-2.24673	0.004	0.018	5.07e-08
CNTN4	1.05e-20	-2.2224	0.008	0.033	1.71e-16
RORB	1.24e-14	-2.22192	0.005	0.023	2.01e-10
GALM	6.13e-15	-2.22175	0.005	0.023	9.96e-11
PLXNA1	3.6e-12	-2.22093	0.004	0.017	5.86e-08
FAM185A	2.12e-11	-2.22093	0.004	0.017	3.45e-07
PEX7	3.51e-10	-2.22081	0.004	0.015	5.7e-06
LRRC29	7.3e-08	-2.21903	0.002	0.01	0.00118545
NBPF1	1.99e-07	-2.21869	0.002	0.01	0.0032317
BCHE	2.03e-36	-2.20372	0.016	0.063	3.31e-32
MSTN	1.3e-10	-2.19185	0.004	0.016	2.11e-06
RNF212	2.58e-09	-2.18905	0.003	0.014	4.19e-05
ATF7IP2	1.7e-10	-2.18745	0.003	0.015	2.76e-06
UTP15	1.25e-09	-2.18378	0.003	0.013	2.03e-05
UPRT	3.38e-09	-2.18378	0.003	0.013	5.5e-05
ZNF736	8.47e-09	-2.18166	0.003	0.012	0.000137585
GLRB	4.05e-09	-2.17929	0.002	0.012	6.58e-05
TMEM37	9.89e-09	-2.17929	0.003	0.012	0.000160622
MAFF	6.8e-08	-2.17366	0.002	0.011	0.0011056
PLAG1	1.85e-07	-2.17028	0.002	0.01	0.00301304
XRRA1	9.56e-17	-2.16835	0.006	0.026	1.55e-12
ZNF595	1.44e-10	-2.16216	0.004	0.015	2.33e-06
PCDHGA3	3.86e-12	-2.15462	0.005	0.02	6.28e-08
C8orf37	4.96e-10	-2.15017	0.003	0.014	8.06e-06
TIMM8A	2.86e-09	-2.15017	0.003	0.013	4.65e-05
MAST3	1.83e-17	-2.14522	0.007	0.029	2.97e-13
ZNF670	3.01e-07	-2.14224	0.003	0.011	0.0048916
SART3	7.14e-07	-2.14224	0.003	0.011	0.0116071
CD83	4.38e-11	-2.14195	0.004	0.017	7.12e-07
ZNF185	5.71e-15	-2.14181	0.005	0.023	9.27e-11
CSRNP1	6.28e-08	-2.13239	0.003	0.011	0.0010201
RBL1	5.33e-11	-2.13185	0.004	0.016	8.67e-07
SUV39H2	3.21e-10	-2.13185	0.004	0.015	5.21e-06
PIGC	1.13e-13	-2.13157	0.005	0.021	1.84e-09
RTN4R	8.67e-10	-2.1279	0.004	0.015	1.41e-05
CACNA1D	3.63e-22	-2.12487	0.009	0.036	5.9e-18
BCO2	1.71e-10	-2.12361	0.003	0.015	2.78e-06
HILPDA	4.66e-07	-2.11983	0.002	0.01	0.00757171
ZNF844	4.66e-07	-2.11983	0.002	0.01	0.00757171
CNTN1	9.51e-54	-2.11909	0.03	0.106	1.55e-49
KIAA1958	2.85e-22	-2.11265	0.01	0.039	4.63e-18
FRAT2	4.88e-11	-2.1058	0.004	0.017	7.92e-07
DNA2	9.25e-09	-2.10171	0.003	0.012	0.000150353
FERMT3	5.18e-08	-2.10171	0.003	0.012	0.000842044
PPP2R2C	9.7e-45	-2.09103	0.021	0.081	1.58e-40
RAD1	1.56e-07	-2.08673	0.003	0.011	0.00253441
KLF6	2.59e-10	-2.08656	0.004	0.016	4.21e-06
CRIP3	4.25e-07	-2.07777	0.002	0.01	0.00689758
FAM161A	1.56e-12	-2.07021	0.006	0.022	2.53e-08
TMEM132C	8.23e-15	-2.06285	0.006	0.024	1.34e-10
SPACA9	5.2e-08	-2.06001	0.003	0.012	0.000844959
ARHGEF5	5.75e-08	-2.06001	0.003	0.011	0.000934685
OSR1	7.06e-12	-2.0588	0.006	0.022	1.15e-07
SCX	3.61e-17	-2.05733	0.008	0.031	5.87e-13
TGM2	9.62e-170	-2.05357	0.095	0.316	1.56e-165
CSE1L	1.08e-10	-2.05155	0.004	0.017	1.76e-06
PACC1	6.31e-08	-2.05039	0.003	0.011	0.00102587
GMDS	1.41e-07	-2.05039	0.003	0.011	0.00229254
NQO1	1.41e-07	-2.05039	0.003	0.011	0.00229254
NOP14	9.27e-09	-2.04453	0.004	0.014	0.00015067
METTL18	3.83e-07	-2.03958	0.003	0.01	0.00622572
LMLN	1.73e-08	-2.03799	0.003	0.013	0.000280895
CACNA1G	5.46e-07	-2.03799	0.003	0.011	0.00886962
TTC33	9.69e-11	-2.03611	0.004	0.017	1.57e-06
AC073111.4	6.78e-14	-2.02962	0.006	0.023	1.1e-09
FAM184A	8.58e-10	-2.02924	0.005	0.017	1.39e-05
TCEAL5	1.27e-07	-2.01707	0.003	0.011	0.00205765
UBALD2	2.06e-10	-2.01533	0.004	0.017	3.35e-06
VAMP4	1.55e-08	-2.00956	0.003	0.013	0.000251526
ZNF569	1.57e-07	-2.00474	0.003	0.011	0.00254806
SLC30A6	3.24e-10	-2.00329	0.005	0.018	5.27e-06
PLCXD1	3.05e-09	-1.99928	0.004	0.015	4.95e-05
GPR35	4.18e-08	-1.99857	0.003	0.012	0.000679116
FRMD4B	1.13e-07	-1.98639	0.003	0.012	0.00183407
LRFN5	4.15e-26	-1.98582	0.012	0.047	6.75e-22
MFSD9	1.38e-08	-1.98309	0.003	0.013	0.000223907
ITGA10	1.82e-10	-1.98298	0.005	0.019	2.95e-06
MSR1	7.23e-15	-1.98054	0.008	0.028	1.18e-10
RTKN2	2.14e-09	-1.98054	0.004	0.014	3.47e-05
ANKMY1	1.07e-08	-1.98054	0.004	0.014	0.000173696
BFSP1	1.21e-10	-1.9755	0.005	0.018	1.97e-06
FAM71F2	3.05e-07	-1.97281	0.003	0.011	0.00495484
YEATS4	3.05e-07	-1.97281	0.003	0.011	0.00495484
FAIM2	1.23e-10	-1.96753	0.005	0.018	1.99e-06
NLGN4X	1.98e-11	-1.95918	0.005	0.019	3.21e-07
TRIM45	1.82e-10	-1.95918	0.005	0.019	2.95e-06
CIB2	5.28e-09	-1.95886	0.004	0.016	8.58e-05
STAT4	1.38e-08	-1.95838	0.003	0.013	0.000224462
PAOX	6.69e-08	-1.95838	0.004	0.013	0.00108618
DGKZ	1.54e-07	-1.95838	0.004	0.013	0.00250314
EHHADH	8.24e-07	-1.95758	0.003	0.01	0.0133911
ZKSCAN3	1.2e-14	-1.95341	0.007	0.025	1.95e-10
WWP1	4.92e-10	-1.94883	0.004	0.017	7.99e-06
SEMA4D	5.01e-08	-1.94745	0.004	0.014	0.000813557
GPR34	1.27e-07	-1.94345	0.003	0.011	0.00206902
ULK3	4.63e-11	-1.94204	0.005	0.019	7.52e-07
MYO1F	1.05e-06	-1.94038	0.002	0.01	0.0170057
ARSG	2.23e-06	-1.94038	0.003	0.01	0.0362082
ZNF765	2.23e-06	-1.94038	0.003	0.01	0.0362082
BEX1	2.23e-06	-1.94038	0.003	0.01	0.0362082
RPP40	1.08e-08	-1.93526	0.004	0.014	0.000174703
ZFAND4	8.96e-06	-1.92715	0.003	0.01	0.145635
PIAS3	1.16e-09	-1.91852	0.004	0.016	1.88e-05
SAP25	2.68e-09	-1.91852	0.004	0.016	4.36e-05
HSF2	5.51e-07	-1.91634	0.003	0.011	0.0089591
MMD	1.48e-09	-1.91428	0.006	0.019	2.41e-05
LRRC4B	1.92e-45	-1.91003	0.025	0.09	3.12e-41
ITGA4	6.4e-27	-1.90892	0.017	0.056	1.04e-22
HTT	1.96e-06	-1.90884	0.003	0.01	0.0317662
SLC25A15	1.96e-06	-1.90884	0.003	0.01	0.0317662
MPV17L	3.92e-09	-1.90569	0.005	0.017	6.37e-05
DDX28	1.49e-06	-1.89973	0.004	0.012	0.0242883
SQLE	3.38e-06	-1.89919	0.003	0.01	0.054932
XYLB	3.56e-10	-1.89555	0.005	0.019	5.78e-06
SH3BP1	4.5e-11	-1.89456	0.004	0.017	7.32e-07
SLC37A2	4.78e-07	-1.89124	0.003	0.012	0.00776681
RTTN	7.16e-09	-1.88756	0.004	0.015	0.000116318
HERPUD1	1.01e-11	-1.88268	0.007	0.024	1.64e-07
MNS1	1.04e-08	-1.88262	0.005	0.016	0.000168296
EFCAB7	1.71e-06	-1.88	0.003	0.01	0.0277075
HDGFL2	2.53e-08	-1.8789	0.004	0.014	0.000410665
EGR1	2.64e-92	-1.8772	0.053	0.182	4.29e-88
TAFA5	2.24e-19	-1.87514	0.009	0.035	3.64e-15
SLC7A3	1.58e-21	-1.87417	0.016	0.049	2.57e-17
PLPP5	1.27e-06	-1.8734	0.003	0.011	0.0206993
TXNDC16	2.75e-11	-1.87172	0.006	0.022	4.47e-07
PECR	6.21e-09	-1.86977	0.004	0.015	0.000100895
CDK5R1	3.21e-08	-1.86977	0.004	0.015	0.000520725
FEN1	1.8e-07	-1.86792	0.003	0.012	0.00292249
SLC8B1	1.8e-07	-1.86792	0.003	0.012	0.00292249
PLEKHG4	2.37e-14	-1.86575	0.008	0.029	3.85e-10
TFPT	1.5e-09	-1.86275	0.005	0.017	2.44e-05
ANAPC10	4.36e-08	-1.85934	0.004	0.014	0.000707624
SLC46A3	4.58e-06	-1.85839	0.003	0.01	0.0743493
SPPL3	1.56e-07	-1.8462	0.004	0.013	0.002532
SHMT1	1.56e-07	-1.8462	0.004	0.013	0.002532
MMS22L	1.8e-07	-1.8462	0.003	0.012	0.00292807
SPTY2D1OS	8e-07	-1.8462	0.004	0.012	0.0129922
ERCC2	8.02e-10	-1.84588	0.005	0.019	1.3e-05
P2RX7	5.85e-14	-1.84573	0.007	0.025	9.5e-10
PIGM	1.15e-07	-1.84336	0.004	0.013	0.0018723
TIFA	1.15e-07	-1.84336	0.004	0.013	0.0018723
DAPK2	8.26e-13	-1.84077	0.006	0.022	1.34e-08
PHLDA1	9.38e-34	-1.83895	0.022	0.073	1.52e-29
SAMD5	1.04e-08	-1.83532	0.005	0.016	0.000169461
AGA	7.16e-09	-1.83256	0.006	0.018	0.000116372
NAPG	3.95e-06	-1.83126	0.003	0.01	0.0642529
RHNO1	3.73e-11	-1.82846	0.007	0.022	6.06e-07
TECR	4.14e-07	-1.82739	0.003	0.012	0.00673081
COL27A1	2.97e-82	-1.8241	0.06	0.186	4.83e-78
SNAPC1	3.41e-09	-1.82179	0.005	0.017	5.53e-05
TGFB2	4.46e-11	-1.81834	0.007	0.022	7.25e-07
PIAS4	1.16e-07	-1.80693	0.004	0.013	0.00188018
TSPAN17	1.1e-06	-1.8066	0.003	0.011	0.017869
CDKL3	3.4e-06	-1.80638	0.003	0.01	0.0552778
PSTPIP2	3.4e-06	-1.80638	0.003	0.01	0.0552778
PCDHB10	3.17e-10	-1.7975	0.007	0.022	5.15e-06
POLE	1.13e-07	-1.79166	0.005	0.015	0.00184333
PC	1.07e-06	-1.78912	0.004	0.013	0.0174079
DFFB	3.06e-07	-1.78754	0.004	0.013	0.00496536
ZSCAN20	3.06e-07	-1.78754	0.004	0.013	0.00496536
C22orf39	3.06e-07	-1.78754	0.004	0.013	0.00496536
PCDHGA2	4.2e-10	-1.78569	0.006	0.02	6.82e-06
TMEM223	4.67e-06	-1.78569	0.003	0.011	0.0758423
NUDT8	1.49e-06	-1.78348	0.003	0.011	0.0241594
MAGEE1	1.49e-06	-1.78348	0.003	0.011	0.0241594
TC2N	6.44e-20	-1.78329	0.014	0.044	1.05e-15
ZNF853	4.6e-06	-1.78081	0.003	0.01	0.0746758
PCDHB5	9.04e-06	-1.78081	0.003	0.01	0.146921
CCDC171	3.2e-11	-1.77677	0.007	0.023	5.2e-07
IGFBP6	2.45e-30	-1.77605	0.02	0.065	3.98e-26
GPR155	2.76e-08	-1.77483	0.004	0.015	0.000448648
ITGAX	4.46e-12	-1.77259	0.01	0.03	7.24e-08
IPPK	2.61e-07	-1.76955	0.004	0.013	0.00424486
MYOCD	5.52e-36	-1.76687	0.028	0.085	8.96e-32
ATP23	8.06e-07	-1.76625	0.004	0.012	0.0130884
TMEM117	7.71e-06	-1.75763	0.003	0.01	0.125341
EMILIN3	3.96e-09	-1.75607	0.005	0.018	6.44e-05
TXNDC9	2.12e-06	-1.74275	0.003	0.011	0.0344263
C1orf131	9.98e-08	-1.73684	0.004	0.014	0.00162199
MTBP	1.45e-05	-1.73633	0.003	0.01	0.235588
ADRB2	1.12e-06	-1.73271	0.005	0.014	0.0181547
YOD1	5.83e-07	-1.73118	0.004	0.013	0.00947456
NFKBID	5.83e-07	-1.73118	0.004	0.013	0.00947456
TFAP2C	8.43e-09	-1.72767	0.004	0.015	0.000137026
CCDC170	5.31e-07	-1.72767	0.005	0.014	0.00862576
RUNX2	5.94e-11	-1.71677	0.007	0.023	9.65e-07
CEP41	2.93e-06	-1.71668	0.003	0.011	0.0475871
C10orf143	2.93e-06	-1.71668	0.003	0.011	0.0475871
HS6ST1	5.56e-06	-1.71668	0.003	0.011	0.0903287
POLR2D	6.57e-06	-1.71668	0.003	0.01	0.106699
RLIM	9.66e-08	-1.71436	0.005	0.015	0.00156875
ZBTB49	2.08e-07	-1.71436	0.005	0.015	0.00338139
ARHGAP4	1.52e-06	-1.70759	0.004	0.012	0.0247383
DACH1	1.35e-16	-1.70364	0.011	0.035	2.2e-12
CCSAP	4.31e-09	-1.70349	0.006	0.019	7.01e-05
PI4K2B	8.13e-08	-1.70175	0.005	0.015	0.00132106
VIPR2	1.77e-17	-1.70073	0.014	0.042	2.87e-13
TMEFF1	1.74e-09	-1.70034	0.007	0.022	2.82e-05
ITCH	2.36e-06	-1.69458	0.005	0.013	0.0383936
CDK5	2.79e-06	-1.69176	0.004	0.012	0.0453396
GVQW3	2.79e-06	-1.69176	0.004	0.012	0.0453396
ABCF3	6.21e-60	-1.69017	0.05	0.147	1.01e-55
NAALAD2	1.54e-56	-1.68874	0.042	0.131	2.51e-52
SAXO2	5.62e-07	-1.68161	0.003	0.011	0.00913244
KCTD1	2.13e-06	-1.68161	0.003	0.011	0.0345917
KY	1.83e-05	-1.68161	0.004	0.011	0.298084
HNRNPK	1.12e-45	-1.68114	0.036	0.109	1.81e-41
ZUP1	1.44e-09	-1.6799	0.008	0.022	2.34e-05
KNTC1	1.46e-08	-1.67838	0.005	0.017	0.000236559
CYP2E1	5.86e-07	-1.67694	0.004	0.013	0.00952476
FIG4	1.08e-06	-1.67694	0.004	0.013	0.0176137
PCDHB2	1.29e-06	-1.67694	0.004	0.012	0.020923
RWDD2A	1.44e-09	-1.67238	0.008	0.022	2.34e-05
AMMECR1	2.65e-05	-1.66953	0.003	0.01	0.430195
SHOX2	6.48e-12	-1.66895	0.008	0.025	1.05e-07
SEMA5A	1.39e-53	-1.66687	0.051	0.142	2.26e-49
GJA1	5.41e-46	-1.6638	0.042	0.12	8.79e-42
STX1A	2.64e-07	-1.66303	0.004	0.013	0.00429293
FLVCR1	4.97e-07	-1.66303	0.004	0.013	0.0080743
KPNA5	4.97e-07	-1.66303	0.004	0.013	0.0080743
CAPN6	5.89e-29	-1.66044	0.022	0.068	9.56e-25
CCN2	7.12e-255	-1.65443	0.27	0.607	1.16e-250
FNDC5	7.69e-09	-1.65364	0.007	0.02	0.000124876
FANCE	1.03e-05	-1.65283	0.003	0.011	0.167045
FAM118B	1.03e-05	-1.65283	0.003	0.011	0.167045
PHLDB3	2.21e-05	-1.65283	0.003	0.01	0.35897
ZNF433	6e-06	-1.65123	0.004	0.012	0.09748
KBTBD7	7.66e-07	-1.64996	0.004	0.013	0.0124462
HPS4	7.66e-07	-1.64996	0.004	0.013	0.0124462
NIPAL3	1.48e-05	-1.64996	0.004	0.012	0.240512
EZH2	2.1e-07	-1.64893	0.005	0.015	0.00341276
ABHD14A	2.27e-06	-1.64807	0.005	0.014	0.0368368
SLC16A9	3.59e-15	-1.64717	0.011	0.035	5.84e-11
ESM1	2.32e-07	-1.64495	0.007	0.019	0.00377592
CHTF18	9.65e-08	-1.63805	0.006	0.018	0.0015678
PHF19	9.19e-07	-1.63785	0.005	0.015	0.0149387
ATRX	2.82e-08	-1.63776	0.004	0.015	0.000457521
DCPS	6.42e-07	-1.63765	0.004	0.014	0.010437
CCDC138	1.37e-06	-1.63765	0.004	0.013	0.0221909
ADA	1.29e-06	-1.63752	0.004	0.012	0.0210015
HSD17B12	2.35e-06	-1.63752	0.004	0.012	0.0381582
DSG2	3.18e-05	-1.63714	0.003	0.01	0.516204
FRZB	1.48e-54	-1.63636	0.059	0.155	2.41e-50
FAM180A	3.1e-09	-1.632	0.009	0.023	5.04e-05
BHMT2	4.03e-17	-1.63176	0.014	0.042	6.54e-13
NDP	4.86e-10	-1.63163	0.008	0.023	7.9e-06
MCM9	2.35e-08	-1.62892	0.006	0.018	0.000382319
CSF1R	7.86e-07	-1.62717	0.005	0.014	0.0127741
POT1	2.99e-07	-1.62603	0.004	0.014	0.00485814
ACHE	3.55e-07	-1.62603	0.004	0.014	0.00577469
OBSCN	1.31e-23	-1.62412	0.021	0.06	2.12e-19
PPIP5K1	8.63e-06	-1.62295	0.004	0.011	0.140148
FSD1L	2.66e-05	-1.62078	0.003	0.01	0.431555
CELF6	8.18e-08	-1.61711	0.005	0.015	0.00132972
CIITA	1.14e-06	-1.61506	0.005	0.014	0.0185223
RFC3	1.64e-06	-1.61258	0.004	0.013	0.0266982
FAM162B	3.01e-05	-1.61258	0.004	0.012	0.4896
CCDC90B	3.4e-08	-1.61204	0.006	0.018	0.000552502
GPAM	1.78e-09	-1.61018	0.007	0.022	2.88e-05
KRR1	3.35e-06	-1.60953	0.004	0.012	0.0544462
HMGXB4	6.02e-06	-1.60953	0.004	0.012	0.0978431
ATAD5	7.22e-06	-1.60953	0.004	0.011	0.117251
MDFI	1.27e-05	-1.60953	0.004	0.011	0.206733
NLGN3	6.62e-06	-1.60568	0.003	0.01	0.107513
APLP1	1.23e-05	-1.60568	0.003	0.01	0.199751
OPN3	2.22e-05	-1.60568	0.003	0.01	0.360145
HEATR3	4.5e-07	-1.60467	0.005	0.014	0.00731666
ZNF619	1.37e-06	-1.60122	0.004	0.013	0.0222865
TMEM143	6.56e-07	-1.59482	0.005	0.015	0.0106503
AKAP5	8.6e-07	-1.59338	0.006	0.016	0.0139666
LEMD3	3.76e-09	-1.59237	0.007	0.02	6.11e-05
PDXP	3.89e-05	-1.59169	0.004	0.01	0.631526
FIBIN	3.41e-10	-1.59161	0.008	0.024	5.54e-06
NEIL2	1.29e-10	-1.59102	0.009	0.025	2.1e-06
HPRT1	1.14e-06	-1.5905	0.005	0.014	0.0185813
TMEM116	7.04e-08	-1.58562	0.006	0.018	0.00114441
RAB11FIP1	3.14e-07	-1.58547	0.005	0.015	0.00509809
SORCS2	7.94e-07	-1.58547	0.005	0.014	0.0128995
HSD17B6	5.96e-10	-1.58275	0.008	0.023	9.68e-06
CDK1	5.2e-07	-1.58145	0.006	0.016	0.00845591
NRXN2	6.41e-26	-1.57513	0.028	0.074	1.04e-21
GMNN	7.25e-06	-1.57421	0.004	0.012	0.117842
ASAP3	3.38e-06	-1.57353	0.006	0.015	0.0548416
DHCR24	5.67e-05	-1.57033	0.003	0.01	0.921732
DPM2	5.67e-05	-1.57033	0.003	0.01	0.921732
STIMATE	7.67e-07	-1.56812	0.005	0.015	0.0124613
ALKBH3	3.13e-06	-1.56812	0.005	0.015	0.0508092
EBPL	1.28e-05	-1.56659	0.004	0.011	0.207482
SWSAP1	6e-06	-1.56384	0.004	0.013	0.0975333
PUS7L	4.53e-07	-1.56006	0.005	0.015	0.00735524
RIMS3	2.56e-06	-1.56006	0.006	0.015	0.0415526
LAMP5	3.9e-09	-1.55937	0.008	0.023	6.34e-05
PGR	3.47e-61	-1.55907	0.073	0.183	5.63e-57
THAP12	6.45e-12	-1.55714	0.011	0.03	1.05e-07
SCNN1D	1.06e-05	-1.55529	0.004	0.012	0.172222
FOXD4L5	2.2e-05	-1.55529	0.004	0.011	0.357074
ANO3	4.31e-07	-1.55175	0.006	0.017	0.00699856
ALKBH2	1.85e-06	-1.55175	0.006	0.017	0.0301246
FOXP4	4.7e-58	-1.54915	0.063	0.167	7.64e-54
SUSD5	1.99e-06	-1.54484	0.005	0.014	0.032385
SMAP2	3.9e-05	-1.54454	0.004	0.01	0.633604
SMYD5	3.9e-05	-1.54454	0.004	0.01	0.633604
CPNE5	3.9e-05	-1.54454	0.004	0.01	0.633604
ZNF675	3.9e-05	-1.54454	0.004	0.01	0.633604
PTN	5.96e-164	-1.54248	0.18	0.433	9.68e-160
HMOX1	1.01e-13	-1.54247	0.014	0.037	1.65e-09
PTCH1	2.5e-15	-1.53515	0.016	0.043	4.07e-11
AKAP6	2.91e-11	-1.5331	0.01	0.028	4.73e-07
AARS	2.65e-09	-1.5331	0.01	0.026	4.3e-05
GEMIN8	1.63e-08	-1.53253	0.007	0.02	0.000264834
TELO2	1.06e-13	-1.52607	0.013	0.035	1.72e-09
SALL1	6.14e-25	-1.52561	0.026	0.07	9.98e-21
NTHL1	3.14e-07	-1.5245	0.008	0.02	0.00510697
SULT1C4	1.13e-06	-1.52003	0.005	0.015	0.0184031
KIF27	1.32e-09	-1.51886	0.01	0.026	2.15e-05
FUT10	5.2e-09	-1.51776	0.008	0.022	8.45e-05
ZSWIM5	1.72e-08	-1.51776	0.008	0.021	0.000278757
MPEG1	2.37e-07	-1.51776	0.007	0.019	0.00384313
RALGPS2	7.01e-17	-1.51764	0.016	0.045	1.14e-12
HELLS	3.6e-13	-1.51691	0.015	0.038	5.86e-09
POPDC2	2.06e-05	-1.51669	0.005	0.012	0.334002
DNAAF2	8.73e-08	-1.51593	0.005	0.017	0.00141847
TFB1M	2.14e-07	-1.51593	0.006	0.017	0.00347211
TMEM97	1.06e-06	-1.51593	0.006	0.016	0.0172213
YIPF1	1.64e-07	-1.51274	0.007	0.018	0.00266595
SPATA20	1.81e-20	-1.51251	0.027	0.066	2.94e-16
TTC12	7.23e-19	-1.5112	0.018	0.051	1.17e-14
CSRNP3	1.3e-18	-1.50742	0.019	0.052	2.11e-14
COL8A2	1.13e-18	-1.50653	0.015	0.046	1.84e-14
VRK1	9.83e-05	-1.50649	0.003	0.01	1
FAM174B	8.05e-09	-1.50586	0.011	0.027	0.000130818
LRRC28	9.93e-08	-1.50508	0.008	0.02	0.00161365
GON7	3.58e-07	-1.50331	0.006	0.017	0.00581949
MACROD2	1.42e-08	-1.50096	0.009	0.024	0.000229999
SFXN4	4.81e-10	-1.49997	0.01	0.028	7.82e-06
TSEN54	1.29e-06	-1.49879	0.006	0.015	0.0209944
MORN4	2.91e-09	-1.49803	0.009	0.024	4.73e-05
KLC4	1.46e-07	-1.49741	0.006	0.018	0.00237568
ARL2BP	3.05e-05	-1.49426	0.004	0.012	0.494943
KHK	3.71e-05	-1.49426	0.004	0.011	0.602543
RPUSD1	2.81e-06	-1.49318	0.005	0.014	0.0456565
STYXL1	1.13e-05	-1.49318	0.005	0.013	0.183962
SSPN	2.58e-06	-1.49237	0.006	0.015	0.0419716
GMPS	3.99e-07	-1.49174	0.006	0.018	0.00648057
ADCK5	1.48e-07	-1.49125	0.007	0.019	0.00241003
CD163	1.23e-07	-1.49084	0.007	0.02	0.00199604
ELL2	3.29e-09	-1.48997	0.01	0.026	5.34e-05
EFHC2	3.95e-10	-1.48976	0.011	0.028	6.42e-06
RAVER2	6.95e-17	-1.48859	0.017	0.046	1.13e-12
ZNF286A	1.65e-08	-1.48644	0.009	0.023	0.000268257
RAB24	1.24e-05	-1.48605	0.004	0.012	0.201325
MTRES1	1.24e-05	-1.48605	0.004	0.012	0.201325
C3orf18	6.68e-05	-1.48589	0.004	0.01	1
PRMT5	1.03e-06	-1.4811	0.007	0.018	0.0167068
HTR2B	1.21e-21	-1.48082	0.022	0.06	1.96e-17
CYFIP2	2.06e-05	-1.47832	0.005	0.012	0.334002
ZNF672	3.24e-05	-1.47668	0.004	0.011	0.526562
SPATA2	0.00011106	-1.47668	0.004	0.01	1
ECM1	2.96e-09	-1.47498	0.009	0.024	4.81e-05
METAP1D	5.93e-07	-1.4748	0.006	0.017	0.0096357
ADGRL1	9.41e-10	-1.47348	0.01	0.027	1.53e-05
RRP7A	2.3e-06	-1.46945	0.006	0.016	0.0373614
ADAL	9.1e-05	-1.46809	0.004	0.011	1
ZFAT	2.59e-06	-1.46715	0.006	0.015	0.0421351
B4GALNT4	7.83e-12	-1.46711	0.013	0.033	1.27e-07
UTP18	3.12e-11	-1.46577	0.013	0.034	5.07e-07
ALCAM	4.77e-20	-1.46469	0.024	0.062	7.75e-16
NRM	2.43e-06	-1.46415	0.005	0.013	0.0394364
TBXA2R	1.39e-05	-1.46415	0.005	0.013	0.225104
CACHD1	2.05e-21	-1.46119	0.027	0.067	3.33e-17
LRIG1	4.42e-68	-1.4604	0.078	0.2	7.19e-64
ZDHHC15	1.96e-07	-1.45785	0.008	0.02	0.00318069
CRTC1	8.89e-07	-1.45785	0.007	0.019	0.0144384
SNN	2.01e-06	-1.45764	0.005	0.014	0.0327218
SOCS7	5.7e-06	-1.45764	0.005	0.014	0.0926178
NPL	9.65e-07	-1.45467	0.006	0.017	0.015685
WDR78	3.06e-05	-1.45256	0.004	0.012	0.496801
PFKFB2	6.11e-05	-1.45256	0.004	0.011	0.992602
EFNB3	1.4e-10	-1.44861	0.011	0.029	2.27e-06
FBLN2	1.51e-14	-1.44605	0.018	0.044	2.46e-10
ZNF696	1.39e-06	-1.44582	0.008	0.019	0.0225861
ARHGAP39	1.18e-06	-1.44571	0.006	0.017	0.0191661
DPH1	1.18e-06	-1.44571	0.006	0.017	0.0191661
TMEM107	8.56e-06	-1.44571	0.006	0.015	0.139107
KLHL3	0.000165702	-1.44535	0.004	0.01	1
ZNF519	4.57e-16	-1.44433	0.017	0.046	7.42e-12
TBX3	1.35e-28	-1.44209	0.042	0.099	2.19e-24
KNSTRN	8.29e-05	-1.44093	0.006	0.014	1
RASL10B	1.24e-05	-1.43889	0.004	0.012	0.20222
SLC18B1	2.06e-05	-1.43889	0.005	0.012	0.335333
ABHD17C	2.06e-05	-1.43889	0.005	0.012	0.335333
LAG3	6.79e-08	-1.43847	0.008	0.021	0.00110254
CFAP54	8.35e-10	-1.43604	0.009	0.024	1.36e-05
FAM98C	8.83e-08	-1.43497	0.008	0.021	0.00143468
ZNF177	1.5e-07	-1.43365	0.007	0.019	0.00244272
PCDHGA8	1.78e-08	-1.43296	0.009	0.024	0.000289217
ZGLP1	1.69e-05	-1.43266	0.005	0.013	0.275363
TOP2A	2.52e-05	-1.43266	0.004	0.012	0.408691
AIF1	2.61e-09	-1.43159	0.008	0.022	4.25e-05
CCN1	5.08e-48	-1.43128	0.088	0.19	8.25e-44
RBM24	6.13e-14	-1.43089	0.016	0.041	9.97e-10
MERTK	3.93e-05	-1.42952	0.004	0.01	0.638634
SCUBE2	2.06e-08	-1.42513	0.009	0.023	0.000334549
ACER3	1.76e-06	-1.42498	0.006	0.016	0.0285787
COG6	9.13e-05	-1.42243	0.004	0.011	1
TTC25	9.13e-05	-1.42243	0.004	0.011	1
POLR1B	1.14e-05	-1.42121	0.005	0.013	0.185524
PLD3	2e-05	-1.4204	0.006	0.015	0.32425
PRSS53	2.55e-06	-1.41983	0.007	0.018	0.0414609
TMEM91	2.8e-12	-1.41629	0.016	0.039	4.55e-08
ATG4D	4.99e-07	-1.41613	0.008	0.02	0.00810276
MEX3A	9.51e-07	-1.41603	0.005	0.015	0.0154563
TMEM231	7.48e-05	-1.41581	0.004	0.011	1
PRDM1	2.73e-21	-1.41374	0.028	0.069	4.43e-17
MGAT3	1.39e-07	-1.41298	0.008	0.021	0.0022652
GNB3	9.96e-12	-1.41002	0.012	0.033	1.62e-07
FGFRL1	3.73e-05	-1.40962	0.004	0.011	0.606792
C5	8.94e-07	-1.40903	0.007	0.019	0.0145219
CPA3	1.18e-05	-1.40866	0.011	0.023	0.191132
CTNS	9.33e-08	-1.40697	0.009	0.022	0.00151568
POP5	6.3e-06	-1.40621	0.005	0.014	0.102416
LRRK2	3.74e-19	-1.40566	0.026	0.063	6.08e-15
ZNF202	3.51e-08	-1.40539	0.01	0.024	0.000570583
PEG3	7.58e-28	-1.40402	0.038	0.093	1.23e-23
NAB1	2.86e-18	-1.40314	0.031	0.069	4.65e-14
ZNF214	9.93e-08	-1.40289	0.01	0.024	0.00161307
ZNF565	1.94e-05	-1.40171	0.006	0.014	0.315651
SLC9A1	7.59e-12	-1.40164	0.014	0.035	1.23e-07
ERI1	2.1e-11	-1.40051	0.013	0.034	3.42e-07
SPATA5L1	5.02e-05	-1.39837	0.004	0.012	0.816316
F3	3.09e-14	-1.39833	0.012	0.035	5.02e-10
ACAD9	1.68e-15	-1.39819	0.02	0.05	2.72e-11
RCC1	1.64e-06	-1.3968	0.007	0.018	0.0267054
MAD1L1	6.44e-08	-1.39602	0.009	0.023	0.00104617
ZBTB40	2.12e-10	-1.39556	0.011	0.028	3.44e-06
ERP29	3.47e-06	-1.39334	0.006	0.015	0.0564413
CEP85	1.25e-05	-1.39324	0.004	0.012	0.203151
RAD52	3.35e-11	-1.39206	0.015	0.036	5.44e-07
SLC7A2	4.18e-11	-1.39056	0.015	0.036	6.79e-07
VWA8	2.45e-25	-1.38988	0.035	0.085	3.99e-21
E2F5	5.52e-06	-1.38944	0.006	0.015	0.0896902
ACACA	1.4e-07	-1.38793	0.008	0.021	0.00228105
NAPEPLD	1.35e-06	-1.387	0.007	0.018	0.0218571
PCDHB16	1.97e-15	-1.38517	0.022	0.052	3.2e-11
ZNHIT2	2.23e-07	-1.38276	0.009	0.022	0.00362428
RAD9A	2.87e-08	-1.38186	0.01	0.024	0.000466366
BZW1	0.000222165	-1.38078	0.004	0.01	1
PCDH20	0.000222165	-1.38078	0.004	0.01	1
NPIPB15	0.000222165	-1.38078	0.004	0.01	1
ALDOC	0.000222165	-1.38078	0.004	0.01	1
EID2B	0.000222165	-1.38078	0.004	0.01	1
CFAP69	1.07e-09	-1.37927	0.011	0.029	1.73e-05
ACP5	3.86e-10	-1.37892	0.012	0.03	6.28e-06
ARHGEF4	4.15e-07	-1.3779	0.009	0.021	0.00674718
EPS8L2	1.49e-07	-1.37561	0.01	0.024	0.00241964
C14orf28	2.76e-07	-1.37559	0.009	0.022	0.00449142
CCDC40	2.34e-06	-1.37549	0.006	0.016	0.0379662
TGIF2	4.71e-06	-1.37549	0.007	0.017	0.0765065
NMNAT3	8.88e-06	-1.37549	0.007	0.016	0.144202
CDK7	5.58e-05	-1.37541	0.005	0.013	0.907114
CIPC	0.000181482	-1.37528	0.004	0.01	1
DNALI1	5.33e-12	-1.37306	0.015	0.038	8.67e-08
MS4A6A	6.41e-12	-1.37306	0.014	0.035	1.04e-07
UBL4A	7.24e-06	-1.37237	0.007	0.017	0.117643
MEST	8.88e-06	-1.37237	0.007	0.016	0.144237
BMT2	3e-12	-1.37209	0.017	0.04	4.88e-08
ABAT	1.24e-05	-1.37153	0.005	0.014	0.201101
CD84	0.000642266	-1.37153	0.005	0.012	1
CYP4V2	1.47e-13	-1.36974	0.024	0.052	2.39e-09
GPRASP2	1.6e-13	-1.36956	0.019	0.046	2.6e-09
RAP1GAP2	3.14e-06	-1.36937	0.007	0.017	0.0510351
TMEM26	1.01e-05	-1.36784	0.006	0.014	0.164566
CFAP70	3.71e-05	-1.36784	0.006	0.014	0.603126
PSD	7.13e-48	-1.36452	0.068	0.162	1.16e-43
TMEM106B	1.28e-09	-1.3645	0.011	0.028	2.08e-05
ATP6V0C	1.31e-08	-1.3645	0.011	0.027	0.000212456
TEX9	3.93e-06	-1.36372	0.007	0.018	0.0638966
ARHGAP42	2.18e-15	-1.36211	0.021	0.051	3.55e-11
SYNGR1	2.97e-19	-1.36179	0.035	0.076	4.82e-15
PPP1R26	1.54e-08	-1.36113	0.01	0.025	0.000249839
OSBPL1A	1.41e-07	-1.3611	0.008	0.021	0.00229839
PTGER2	5.8e-29	-1.3596	0.04	0.097	9.42e-25
TMEM41A	9.36e-07	-1.35687	0.009	0.021	0.0152076
PCDHB11	1.7e-06	-1.35687	0.009	0.021	0.0276978
PCDH7	3.26e-31	-1.35588	0.047	0.111	5.3e-27
MRI1	6.28e-21	-1.3556	0.028	0.069	1.02e-16
BCDIN3D	4.18e-07	-1.35486	0.009	0.022	0.00679257
RIPOR3	5.44e-18	-1.35468	0.026	0.062	8.84e-14
DHRS12	8.78e-15	-1.35412	0.021	0.05	1.43e-10
TMEM80	4.42e-14	-1.35334	0.016	0.042	7.18e-10
DUSP19	4.13e-05	-1.35271	0.005	0.012	0.671025
HSPB11	0.000126913	-1.35271	0.005	0.012	1
TAPBPL	0.000240427	-1.35271	0.005	0.011	1
EPDR1	1.61e-16	-1.35257	0.025	0.058	2.61e-12
GEN1	5.67e-05	-1.35185	0.006	0.014	0.920608
MDK	3.47e-35	-1.35121	0.052	0.123	5.64e-31
HERC5	3.82e-09	-1.35058	0.013	0.03	6.21e-05
EFS	1.67e-28	-1.35048	0.04	0.097	2.71e-24
C1QBP	3.71e-06	-1.34907	0.006	0.016	0.060337
USP49	4.4e-05	-1.34546	0.005	0.013	0.715329
SPOPL	5.82e-14	-1.34237	0.02	0.047	9.46e-10
HECTD2	3.41e-07	-1.34098	0.009	0.021	0.00554189
UBFD1	2.94e-05	-1.33898	0.005	0.013	0.477279
AVPR1A	1.64e-16	-1.33861	0.024	0.057	2.67e-12
ZNF280C	1.43e-06	-1.33729	0.009	0.021	0.02316
CUL7	6.61e-07	-1.3368	0.007	0.018	0.0107313
FAXC	7.34e-06	-1.3368	0.007	0.017	0.119284
GASK1A	9.35e-11	-1.33619	0.016	0.037	1.52e-06
NARS2	2.12e-15	-1.33577	0.022	0.053	3.45e-11
SPATA33	5.99e-06	-1.33463	0.007	0.018	0.0972661
PABPC1L	8.15e-12	-1.33308	0.018	0.041	1.32e-07
USP54	1.87e-07	-1.33217	0.009	0.023	0.00303105
ACSS1	1.48e-10	-1.33163	0.015	0.035	2.4e-06
MALT1	1.92e-10	-1.33152	0.017	0.038	3.13e-06
PHAX	2.63e-06	-1.33053	0.008	0.018	0.0427904
PTCH2	1.02e-05	-1.33046	0.006	0.014	0.165338
ZNF784	5.7e-05	-1.33046	0.006	0.014	0.926244
PRKCZ	0.000272857	-1.33033	0.004	0.01	1
GAS7	3.8e-41	-1.32988	0.063	0.147	6.17e-37
TBC1D32	1.75e-06	-1.32859	0.008	0.019	0.0284935
ASIC3	4.17e-07	-1.32603	0.01	0.023	0.00676968
DENND1B	4.47e-08	-1.3246	0.01	0.024	0.000726553
DNM1	1.6e-14	-1.32455	0.022	0.051	2.6e-10
C1orf112	4.12e-10	-1.32325	0.013	0.032	6.7e-06
SLC29A1	4.31e-09	-1.32321	0.01	0.025	7.01e-05
CENPX	5.97e-07	-1.32321	0.01	0.023	0.00969691
MROH7	4.07e-07	-1.32317	0.008	0.02	0.00660571
TLR1	1.65e-05	-1.32312	0.006	0.015	0.268133
ZNF420	0.000288851	-1.323	0.004	0.01	1
ZNF226	3.1e-05	-1.31829	0.009	0.019	0.503906
PDE5A	1.19e-50	-1.31787	0.079	0.182	1.93e-46
MBOAT1	1.95e-19	-1.31728	0.031	0.072	3.16e-15
LONRF2	5.02e-10	-1.31682	0.012	0.031	8.15e-06
ZNF552	2.51e-05	-1.31477	0.007	0.016	0.407007
CCDC28A	3.24e-18	-1.31462	0.027	0.063	5.26e-14
NUDT19	4.48e-08	-1.31446	0.011	0.026	0.000728629
ADRA2A	6.28e-17	-1.31437	0.029	0.065	1.02e-12
RGMA	7.99e-40	-1.31255	0.058	0.139	1.3e-35
PRRT2	1.75e-42	-1.31212	0.064	0.15	2.84e-38
MGME1	9.22e-09	-1.31119	0.014	0.032	0.000149788
ZGRF1	2.4e-08	-1.31117	0.012	0.028	0.000389945
ZNF585A	0.000449837	-1.31101	0.005	0.011	1
SEPHS1	1.89e-17	-1.30908	0.027	0.062	3.06e-13
CEP78	1.87e-09	-1.30699	0.015	0.034	3.05e-05
TAF3	8.47e-05	-1.30604	0.005	0.012	1
RUNX1	1.91e-16	-1.30588	0.029	0.065	3.1e-12
ISG15	1.07e-05	-1.305	0.01	0.021	0.174097
ANKH	1.98e-25	-1.30463	0.046	0.102	3.21e-21
TRUB2	2.39e-05	-1.30458	0.008	0.017	0.388318
FASTKD3	4.42e-05	-1.30376	0.005	0.013	0.718285
TRMT12	6.9e-05	-1.30376	0.005	0.013	1
PGAP2	8.77e-07	-1.30171	0.01	0.023	0.0142452
LRWD1	4.91e-06	-1.30167	0.008	0.018	0.0797793
DENND2C	0.000105939	-1.3016	0.005	0.013	1
TMA16	1.69e-11	-1.30057	0.018	0.042	2.75e-07
TUSC1	4.88e-06	-1.3003	0.008	0.019	0.0792676
PDGFRL	1.34e-12	-1.29999	0.018	0.043	2.18e-08
PDE1A	7.07e-12	-1.29712	0.016	0.039	1.15e-07
NOVA1	2.92e-11	-1.29712	0.016	0.038	4.75e-07
CAP1	3.91e-06	-1.29644	0.009	0.02	0.063462
CRPPA	5.3e-07	-1.29411	0.012	0.025	0.00861783
GRK6	8.27e-06	-1.29296	0.009	0.02	0.13429
NSUN7	0.000127941	-1.29236	0.006	0.014	1
FAAP100	6.52e-11	-1.29193	0.018	0.041	1.06e-06
ENOX1	5.19e-07	-1.29082	0.009	0.021	0.00843419
SERPINE2	1.17e-06	-1.29082	0.009	0.021	0.019009
PTPRU	1.75e-18	-1.29028	0.029	0.067	2.85e-14
STBD1	2.52e-05	-1.28925	0.006	0.015	0.410235
SLC25A37	1.36e-19	-1.28924	0.032	0.073	2.21e-15
C15orf61	1.12e-05	-1.28881	0.009	0.02	0.182095
FAM216A	2.22e-07	-1.28859	0.013	0.028	0.00361147
ZNF501	6.43e-06	-1.28785	0.009	0.021	0.10443
NCDN	6.42e-11	-1.28677	0.016	0.038	1.04e-06
TUBGCP4	9.01e-06	-1.28641	0.007	0.016	0.146394
PER2	3.81e-05	-1.28641	0.006	0.015	0.618913
SEPTIN6	4.24e-11	-1.28516	0.017	0.039	6.89e-07
SGIP1	7.59e-07	-1.28427	0.01	0.022	0.0123293
OAS1	1.99e-06	-1.28427	0.01	0.022	0.0323842
RFX7	2.05e-05	-1.28381	0.007	0.016	0.33325
PUSL1	1.36e-05	-1.28141	0.007	0.017	0.22135
FARS2	3.05e-05	-1.28141	0.007	0.016	0.495707
ZNF662	3.62e-05	-1.28028	0.007	0.017	0.58791
ZNF391	0.000113109	-1.28028	0.007	0.016	1
THNSL2	6.47e-15	-1.27822	0.021	0.051	1.05e-10
TTC26	6.5e-07	-1.27819	0.011	0.025	0.0105673
HIRA	7.38e-06	-1.27816	0.008	0.018	0.119906
FUNDC1	1.96e-05	-1.27715	0.008	0.018	0.318094
MAP3K5	2.34e-09	-1.27671	0.015	0.033	3.81e-05
CPEB1	1.09e-05	-1.27618	0.008	0.018	0.177272
SLC25A22	0.000436727	-1.27609	0.004	0.01	1
PROM2	0.000680655	-1.27609	0.004	0.01	1
MMP11	6.46e-79	-1.27586	0.088	0.23	1.05e-74
PRICKLE2	2.77e-31	-1.27551	0.057	0.125	4.49e-27
ZNF839	7.04e-05	-1.27525	0.008	0.017	1
HNMT	4.39e-18	-1.27441	0.027	0.064	7.14e-14
KIAA1614	1.78e-06	-1.27435	0.008	0.02	0.0289674
TULP3	7.84e-11	-1.27395	0.016	0.038	1.27e-06
ADAMTS19	1.47e-17	-1.27307	0.035	0.075	2.39e-13
POLA2	1.78e-06	-1.27264	0.008	0.02	0.0289751
DCLRE1C	7.05e-06	-1.27264	0.009	0.019	0.114473
MVD	7.28e-08	-1.27212	0.013	0.028	0.00118253
ATP10D	1.96e-11	-1.27203	0.021	0.045	3.18e-07
ANK3	1.12e-09	-1.27186	0.017	0.036	1.82e-05
FRA10AC1	1.95e-08	-1.27159	0.012	0.029	0.000316302
ARRB2	1.36e-13	-1.27109	0.02	0.048	2.22e-09
MIS18A	0.000365821	-1.27096	0.004	0.011	1
FAM107B	2.53e-48	-1.27005	0.087	0.19	4.11e-44
R3HDM2	0.000365832	-1.26947	0.004	0.011	1
SNRPN	4.52e-16	-1.26911	0.026	0.059	7.35e-12
CDK20	1.25e-11	-1.26886	0.018	0.041	2.04e-07
CASP8	1.44e-08	-1.26862	0.014	0.031	0.000233704
OPLAH	0.000242144	-1.26807	0.005	0.011	1
SAC3D1	0.000242144	-1.26807	0.005	0.011	1
SEPTIN1	0.000242144	-1.26807	0.005	0.011	1
DLG3	3.28e-11	-1.2675	0.018	0.041	5.33e-07
DHFR	1.7e-06	-1.26747	0.01	0.022	0.0276173
SNHG32	1.29e-38	-1.26736	0.068	0.15	2.1e-34
RCSD1	0.000127864	-1.26675	0.005	0.012	1
USO1	8.1e-18	-1.2665	0.031	0.07	1.32e-13
ANKMY2	1.56e-07	-1.26618	0.01	0.023	0.00252715
FAM124A	0.000160426	-1.26551	0.005	0.012	1
MTERF4	3.68e-22	-1.26487	0.038	0.085	5.99e-18
ROR1	3.82e-23	-1.26473	0.037	0.086	6.21e-19
EFCAB2	7.21e-10	-1.26441	0.015	0.035	1.17e-05
FAM118A	1.37e-14	-1.26353	0.025	0.055	2.23e-10
TAMM41	8.34e-16	-1.26332	0.025	0.058	1.35e-11
MSH2	4.45e-13	-1.26331	0.02	0.047	7.23e-09
GUSB	0.000130616	-1.26323	0.005	0.012	1
NKD1	1.6e-08	-1.26275	0.01	0.025	0.000259834
TCAF1	1.03e-23	-1.26273	0.043	0.095	1.68e-19
KIAA1755	1.1e-19	-1.26271	0.034	0.076	1.79e-15
IQCB1	8.66e-05	-1.26218	0.005	0.013	1
RNF135	8.66e-05	-1.26218	0.005	0.013	1
GREB1	2.6e-73	-1.26205	0.148	0.301	4.22e-69
BACH2	1.28e-05	-1.26173	0.011	0.022	0.208606
TSPAN6	1.75e-17	-1.26111	0.032	0.071	2.84e-13
NOP58	3.06e-08	-1.25939	0.011	0.027	0.000496671
NEDD4L	6.81e-08	-1.25939	0.011	0.026	0.00110627
CD4	1.45e-05	-1.25939	0.011	0.023	0.234847
SNRPA1	3.07e-05	-1.25935	0.006	0.014	0.498392
DMAC2L	5.04e-11	-1.25855	0.017	0.039	8.18e-07
CDRT4	2.15e-07	-1.25853	0.011	0.026	0.00349516
SIPA1L1	2.5e-05	-1.25849	0.006	0.014	0.406603
CISH	0.000230928	-1.25768	0.006	0.013	1
MBTPS2	2.77e-08	-1.25514	0.013	0.029	0.000449532
FGF7	7.83e-31	-1.25513	0.053	0.119	1.27e-26
XKR6	2.53e-05	-1.25412	0.007	0.016	0.410939
EFCAB6	0.000170264	-1.2535	0.007	0.015	1
PRR16	3.93e-11	-1.25294	0.02	0.043	6.39e-07
ANKRD36	2.49e-05	-1.2529	0.007	0.017	0.403978
DBF4	0.000335023	-1.25232	0.007	0.015	1
KREMEN1	1.1e-05	-1.25073	0.008	0.018	0.178243
FOXO6	5.02e-05	-1.24976	0.008	0.017	0.815683
SPRY1	2.53e-25	-1.24919	0.046	0.101	4.1e-21
PSMA1	8.69e-06	-1.24843	0.008	0.019	0.141187
MAD2L1BP	8.37e-06	-1.24762	0.009	0.02	0.135907
FANCF	0.000155441	-1.24762	0.009	0.018	1
TUSC3	1.94e-32	-1.24721	0.056	0.126	3.15e-28
EARS2	3.13e-06	-1.24686	0.009	0.021	0.0509084
CAPG	1.76e-19	-1.246	0.032	0.074	2.85e-15
GNPDA1	1.19e-10	-1.24549	0.018	0.04	1.94e-06
VKORC1L1	2.46e-06	-1.24515	0.01	0.022	0.0399951
ZNF483	1.11e-22	-1.24487	0.046	0.098	1.8e-18
NOC2L	1.28e-06	-1.24368	0.011	0.023	0.0207707
MED19	1.92e-05	-1.24368	0.011	0.022	0.311922
PPTC7	1.91e-07	-1.24341	0.01	0.024	0.00310417
DOCK5	1.28e-19	-1.24187	0.032	0.073	2.08e-15
PGAP1	1.11e-07	-1.24047	0.012	0.028	0.00180656
N4BP2	9.59e-16	-1.23992	0.024	0.057	1.56e-11
RCL1	1.19e-08	-1.23844	0.014	0.031	0.000194001
RXYLT1	1.24e-07	-1.23844	0.014	0.03	0.00200974
CYP51A1	1.97e-08	-1.23801	0.014	0.032	0.000319973
FAM171B	3.07e-15	-1.23788	0.028	0.062	4.99e-11
ESR1	1.67e-63	-1.23767	0.114	0.247	2.72e-59
BGN	3.16e-181	-1.23261	0.351	0.639	5.13e-177
CADM1	3.62e-29	-1.22781	0.045	0.105	5.88e-25
MYLIP	2.24e-36	-1.22381	0.06	0.138	3.65e-32
TRMT11	6.36e-17	-1.22381	0.028	0.064	1.03e-12
DTWD1	4.38e-13	-1.22381	0.018	0.043	7.11e-09
AGAP2	1.48e-10	-1.22381	0.016	0.037	2.41e-06
GUF1	4.72e-10	-1.22381	0.018	0.039	7.67e-06
ZNF713	1.48e-09	-1.22381	0.012	0.03	2.4e-05
MPPED2	1.49e-09	-1.22381	0.013	0.031	2.41e-05
TTC31	1.79e-09	-1.22381	0.013	0.031	2.91e-05
SETD6	1.91e-08	-1.22381	0.015	0.032	0.000310029
TTC13	1.24e-07	-1.22381	0.013	0.029	0.00201289
AK6	1.24e-07	-1.22381	0.013	0.029	0.00201394
DOCK10	1.66e-07	-1.22381	0.012	0.027	0.00269585
NAV2	5.7e-07	-1.22381	0.011	0.025	0.00926039
ADIPOR2	8.32e-07	-1.22381	0.013	0.027	0.0135167
SLC25A33	2.2e-06	-1.22381	0.009	0.02	0.0356798
MTMR11	3.87e-06	-1.22381	0.012	0.024	0.0629289
ISCA1	4.12e-06	-1.22381	0.01	0.022	0.0669833
NTN1	4.56e-06	-1.22381	0.009	0.021	0.0741387
NDOR1	1.33e-05	-1.22381	0.006	0.015	0.215588
SLC39A10	1.35e-05	-1.22381	0.008	0.018	0.21981
WDR4	1.9e-05	-1.22381	0.008	0.018	0.30902
MXD1	2.08e-05	-1.22381	0.006	0.015	0.337659
CLMN	3.65e-05	-1.22381	0.007	0.017	0.593561
HOXA3	3.84e-05	-1.22381	0.006	0.014	0.623115
BEND5	3.86e-05	-1.22381	0.009	0.018	0.627483
RALGPS1	4.31e-05	-1.22381	0.008	0.017	0.699514
FOCAD	7.08e-05	-1.22381	0.006	0.014	1
DNAJC12	0.000131198	-1.22381	0.006	0.013	1
SLC35G2	0.000243501	-1.22381	0.005	0.012	1
DIRAS1	0.000294389	-1.22381	0.005	0.012	1
CCL2	0.000298611	-1.22381	0.005	0.011	1
NUFIP1	0.000452944	-1.22381	0.005	0.011	1
WDPCP	0.000671488	-1.22381	0.006	0.013	1
PINX1	0.000686102	-1.22381	0.004	0.01	1
SPICE1	1.17e-08	-1.22381	0.016	0.034	0.000190364
ZNF75D	4.58e-08	-1.22381	0.015	0.032	0.000743451
DNHD1	8.57e-07	-1.22381	0.011	0.024	0.0139218
TCF19	1.13e-06	-1.22381	0.007	0.018	0.0183933
NCAPG2	2.1e-06	-1.22381	0.009	0.021	0.0340775
TMEM174	1.73e-05	-1.22381	0.01	0.021	0.280552
DNAH7	0.000299386	-1.22381	0.005	0.012	1
NFATC2IP	0.000299386	-1.22381	0.005	0.012	1
FAHD2B	0.000368194	-1.22381	0.005	0.011	1
ESYT3	0.000368194	-1.22381	0.005	0.011	1
CCDC61	0.000557372	-1.22381	0.005	0.011	1
USP53	4.82e-16	-1.21796	0.035	0.073	7.83e-12
IGFBP3	3.19e-108	-1.21655	0.202	0.412	5.18e-104
SNCAIP	6.3e-22	-1.21416	0.041	0.09	1.02e-17
TTLL7	1.36e-08	-1.2125	0.018	0.037	0.000221465
HSPA5	1.13e-08	-1.21204	0.018	0.037	0.000184283
MSI2	9.5e-28	-1.21161	0.06	0.125	1.54e-23
ZNF33A	2.14e-09	-1.211	0.016	0.035	3.47e-05
PCDHGC3	1.3e-24	-1.21091	0.044	0.098	2.12e-20
FOXO3	1.41e-21	-1.20992	0.044	0.093	2.29e-17
KDELR1	4.77e-08	-1.20856	0.013	0.03	0.00077515
DHX58	9.62e-08	-1.20676	0.012	0.027	0.00156282
METTL8	3.64e-07	-1.20655	0.012	0.026	0.00591267
RGS4	8.86e-12	-1.20644	0.022	0.048	1.44e-07
REEP2	1.63e-06	-1.20613	0.012	0.025	0.0265345
SLC2A1	3.83e-07	-1.20546	0.011	0.025	0.00621936
LARP1B	7.31e-07	-1.20421	0.011	0.024	0.0118731
TSEN2	2.51e-06	-1.20278	0.01	0.022	0.0407429
CENPV	5.1e-06	-1.20278	0.01	0.022	0.0828133
DTD2	9.9e-06	-1.20076	0.009	0.02	0.160807
COPS9	2.43e-05	-1.20076	0.009	0.02	0.394276
UNC5B	1.28e-09	-1.20037	0.017	0.038	2.07e-05
MIS12	2.23e-05	-1.19919	0.009	0.019	0.362963
NEK1	1.92e-08	-1.19874	0.016	0.034	0.000312505
EDNRA	1.52e-37	-1.19795	0.076	0.161	2.47e-33
RIC3	2.65e-13	-1.19698	0.029	0.061	4.3e-09
GCFC2	1.17e-11	-1.19635	0.023	0.049	1.9e-07
SLC25A6	3.8e-15	-1.19621	0.03	0.064	6.17e-11
FAM20A	7.95e-22	-1.19616	0.043	0.092	1.29e-17
GFM2	6.3e-09	-1.19609	0.015	0.033	0.000102358
BTN2A2	0.000225342	-1.19585	0.008	0.016	1
MEF2B	2.05e-05	-1.1953	0.007	0.017	0.332533
CHRD	1.43e-20	-1.19438	0.041	0.087	2.32e-16
RASA2	6.45e-08	-1.19409	0.014	0.03	0.00104856
PIGP	7.2e-07	-1.19315	0.013	0.028	0.0117058
BCL2L11	0.000365867	-1.19285	0.007	0.014	1
PHOSPHO2	7.28e-09	-1.19282	0.013	0.03	0.000118355
INTS13	9.88e-17	-1.19253	0.032	0.07	1.61e-12
ARF3	4.82e-08	-1.19214	0.013	0.03	0.000782949
VCAM1	6.89e-07	-1.19179	0.013	0.027	0.0111933
ZNF235	2.56e-05	-1.19146	0.006	0.015	0.416051
RAB3IL1	4.84e-28	-1.1914	0.054	0.116	7.86e-24
ZNF589	3.33e-06	-1.1903	0.013	0.026	0.0540868
SLC2A13	7.66e-18	-1.1902	0.029	0.067	1.25e-13
GPR137B	1.77e-24	-1.18987	0.059	0.118	2.87e-20
RNASET2	1.75e-06	-1.18909	0.012	0.026	0.0283823
MS4A7	3.01e-06	-1.18823	0.011	0.024	0.0489645
MAP3K1	1.25e-05	-1.18823	0.012	0.024	0.20346
INTS6	6.14e-09	-1.18669	0.017	0.035	9.97e-05
TCTN2	3.84e-13	-1.18636	0.021	0.048	6.23e-09
TRMU	8.27e-07	-1.18589	0.011	0.025	0.0134331
TIMM17B	0.000240411	-1.18544	0.006	0.013	1
COLEC12	6.04e-25	-1.18524	0.049	0.106	9.82e-21
MLLT3	3.21e-25	-1.18514	0.051	0.109	5.21e-21
SEC16B	1.07e-05	-1.18487	0.011	0.023	0.173089
SMOC2	1.79e-132	-1.18458	0.208	0.447	2.9e-128
TAF1B	2.63e-06	-1.18434	0.011	0.023	0.0427867
AMFR	1.7e-07	-1.18395	0.016	0.032	0.00275514
PUS1	0.000244374	-1.18328	0.005	0.012	1
ARID3B	0.000363409	-1.18328	0.005	0.012	1
NET1	9.12e-13	-1.18296	0.024	0.053	1.48e-08
PJVK	8.86e-06	-1.18265	0.01	0.021	0.143914
AHI1	1.01e-19	-1.18216	0.038	0.083	1.64e-15
ZNF408	0.000446979	-1.18211	0.005	0.012	1
PAM	3.7e-29	-1.18172	0.059	0.126	6.01e-25
PRKD1	1.54e-14	-1.18119	0.027	0.06	2.5e-10
CLEC11A	2.22e-13	-1.18094	0.034	0.066	3.61e-09
ANKRD49	1.52e-05	-1.18081	0.01	0.021	0.246877
C16orf70	2.58e-05	-1.18081	0.01	0.021	0.418845
TMLHE	1.79e-14	-1.18076	0.028	0.061	2.91e-10
SPTBN4	9.42e-06	-1.18016	0.01	0.021	0.153115
PPAT	0.00067679	-1.17955	0.005	0.011	1
SDHAF1	1.62e-08	-1.17707	0.013	0.03	0.000263921
RASSF4	0.000688246	-1.17666	0.004	0.01	1
PIGV	8.51e-06	-1.17658	0.009	0.02	0.138237
ARPC5	3.66e-05	-1.17658	0.009	0.019	0.594147
PDCD4	2.21e-59	-1.17605	0.128	0.26	3.6e-55
AC093323.1	1.84e-06	-1.17603	0.013	0.027	0.0298629
NPHP4	0.0012642	-1.17507	0.004	0.01	1
MFSD3	0.0012642	-1.17507	0.004	0.01	1
SVIP	0.0012642	-1.17507	0.004	0.01	1
LDB3	1.14e-08	-1.17496	0.012	0.029	0.000184875
SIRT5	1.18e-06	-1.17383	0.013	0.027	0.0190957
ADPRH	0.00155816	-1.17336	0.004	0.01	1
VPS16	7.21e-06	-1.17327	0.009	0.019	0.117201
KAT8	4.81e-05	-1.17327	0.008	0.018	0.78119
PLAGL1	4.35e-14	-1.17244	0.027	0.058	7.07e-10
ASB16	4.12e-05	-1.17237	0.008	0.018	0.669005
OLFML2A	1.13e-40	-1.17229	0.077	0.167	1.83e-36
PITPNM2	7.48e-14	-1.1716	0.031	0.063	1.22e-09
ERAP2	4.14e-05	-1.17144	0.008	0.018	0.67225
CYS1	1.95e-08	-1.17091	0.016	0.034	0.000317171
RIF1	1.74e-18	-1.17048	0.04	0.084	2.82e-14
SLC41A2	2.89e-05	-1.17047	0.008	0.018	0.469758
N4BP1	3.01e-05	-1.17047	0.008	0.017	0.488461
PCDHGA5	5.1e-05	-1.16947	0.008	0.017	0.828683
SKP2	0.000107884	-1.16842	0.008	0.017	1
C1QA	1.56e-08	-1.16814	0.017	0.036	0.000253051
ANO1	1.38e-35	-1.16786	0.067	0.146	2.24e-31
FAM227A	2.51e-05	-1.16734	0.007	0.017	0.408037
ABCD3	3.27e-13	-1.16725	0.032	0.064	5.31e-09
CENPBD1	1.08e-05	-1.16655	0.011	0.023	0.175087
EGFR	4.42e-18	-1.16643	0.039	0.081	7.18e-14
PACRG	4.53e-05	-1.16621	0.007	0.016	0.735546
PDE4C	0.000468425	-1.16621	0.008	0.015	1
CCND2	6.76e-40	-1.16559	0.08	0.17	1.1e-35
CPVL	5.99e-08	-1.16557	0.013	0.029	0.000972837
TIMP2	6.31e-07	-1.165	0.01	0.023	0.010245
TRIM14	1.07e-06	-1.165	0.011	0.024	0.0173075
CSNK1G3	3.88e-18	-1.16428	0.036	0.078	6.3e-14
TPMT	3.15e-05	-1.16254	0.007	0.015	0.511483
PPWD1	1.97e-06	-1.1625	0.01	0.023	0.0320292
ACVR1B	9.96e-09	-1.16246	0.017	0.036	0.000161745
PAK4	6.77e-07	-1.16182	0.014	0.029	0.0110002
ENPP2	5.47e-15	-1.16167	0.04	0.078	8.89e-11
SNED1	1.46e-13	-1.16145	0.026	0.056	2.38e-09
DPH6	1.04e-18	-1.16141	0.043	0.087	1.7e-14
ATG4B	2.3e-18	-1.16122	0.035	0.076	3.74e-14
SAYSD1	2.94e-06	-1.16071	0.01	0.022	0.047794
SLC41A3	0.000102755	-1.15982	0.007	0.015	1
RFC5	0.000259755	-1.15982	0.007	0.014	1
WDYHV1	1.54e-05	-1.15978	0.01	0.021	0.249755
CDKL5	4.22e-13	-1.15863	0.025	0.054	6.85e-09
ATG10	5.91e-10	-1.15827	0.019	0.041	9.6e-06
ITGA2	3.63e-06	-1.15782	0.01	0.022	0.0589436
PROSER1	2.8e-05	-1.15782	0.01	0.02	0.454334
AR	8.22e-20	-1.15738	0.042	0.088	1.34e-15
ZNF195	8.29e-06	-1.15518	0.012	0.025	0.134672
C20orf96	6.52e-12	-1.15495	0.027	0.054	1.06e-07
PHGDH	2.27e-09	-1.1546	0.018	0.039	3.68e-05
TRIAP1	9.64e-09	-1.1546	0.018	0.038	0.000156618
DENND2A	2.53e-24	-1.15415	0.053	0.11	4.11e-20
ZBED8	6.81e-10	-1.15405	0.018	0.039	1.11e-05
CCDC80	2.74e-205	-1.15385	0.437	0.733	4.45e-201
SLC7A7	0.00101475	-1.15359	0.006	0.013	1
MXRA8	4.59e-99	-1.15284	0.215	0.416	7.45e-95
GLI1	1.22e-07	-1.1528	0.015	0.031	0.00198117
PCOLCE	2.44e-29	-1.15238	0.061	0.128	3.97e-25
HYI	2.76e-13	-1.1523	0.025	0.055	4.48e-09
COA1	1.82e-07	-1.15209	0.014	0.03	0.00295979
LZTS3	0.00019634	-1.15	0.006	0.013	1
GSTA4	0.000287316	-1.15	0.006	0.013	1
NDC80	1.05e-05	-1.14994	0.009	0.019	0.170486
TUB	3.69e-16	-1.14929	0.037	0.076	5.99e-12
RARG	1.38e-11	-1.1489	0.021	0.046	2.25e-07
MCEE	3.21e-10	-1.14859	0.017	0.038	5.21e-06
WDR35	6.37e-10	-1.14791	0.022	0.045	1.03e-05
ANKRD26	8.06e-21	-1.14753	0.045	0.094	1.31e-16
NINL	3.08e-12	-1.14678	0.024	0.051	5e-08
PLCE1	3.35e-22	-1.14673	0.059	0.115	5.44e-18
SLC9A3R1	0.000296595	-1.14602	0.005	0.012	1
SRPK2	7.21e-05	-1.14595	0.008	0.017	1
SNX8	1.11e-09	-1.14587	0.019	0.04	1.81e-05
ERCC1	5.42e-21	-1.1456	0.047	0.097	8.8e-17
MRE11	1.87e-09	-1.14526	0.019	0.039	3.04e-05
RPAP1	3.86e-09	-1.14526	0.018	0.039	6.28e-05
ANKRD35	2.58e-07	-1.14504	0.013	0.029	0.00418896
PCDHGA6	5.13e-06	-1.14485	0.01	0.022	0.0833226
DNAJC9	1.7e-06	-1.14417	0.014	0.028	0.0276513
SWT1	2.27e-06	-1.14417	0.013	0.027	0.036958
HMGN5	1.49e-05	-1.14417	0.013	0.026	0.2425
PLA2G7	0.000105069	-1.14386	0.005	0.012	1
ZNF841	7.54e-08	-1.14371	0.015	0.032	0.00122471
FAM13A	4.13e-25	-1.14329	0.059	0.119	6.7e-21
PLXNA3	9.31e-08	-1.1422	0.015	0.032	0.00151213
ATP6V1B2	5.89e-15	-1.14196	0.039	0.077	9.57e-11
APPBP2	1.1e-12	-1.14192	0.022	0.05	1.79e-08
GAS2L1	0.000448489	-1.14158	0.005	0.012	1
MPP2	0.00202438	-1.14158	0.005	0.011	1
CCDC71	8.97e-05	-1.14147	0.011	0.021	1
TOMM34	3.83e-07	-1.14144	0.013	0.028	0.00622946
LPL	4.9e-06	-1.14074	0.018	0.033	0.0796069
RFC4	1.74e-05	-1.14027	0.01	0.021	0.283459
UFL1	0.000108413	-1.13991	0.008	0.017	1
PDIK1L	7.21e-07	-1.13983	0.015	0.031	0.0117162
TMEM25	1.19e-06	-1.13983	0.015	0.03	0.0193744
C1QC	8.06e-12	-1.13938	0.026	0.054	1.31e-07
CES4A	0.000551733	-1.13917	0.005	0.011	1
WNK2	1.51e-09	-1.13864	0.016	0.036	2.45e-05
ZNF782	2.84e-09	-1.13864	0.017	0.037	4.62e-05
ERAP1	8.58e-07	-1.13852	0.013	0.027	0.0139441
TRIB3	5.36e-05	-1.13825	0.008	0.017	0.871024
KCNE3	9.4e-05	-1.13825	0.008	0.016	1
FAHD2A	0.000278373	-1.13825	0.008	0.015	1
NIFK	3.59e-05	-1.13778	0.01	0.021	0.583032
PUM3	5.07e-06	-1.1375	0.012	0.025	0.0823215
PAICS	0.000993621	-1.13661	0.005	0.011	1
POMT1	4.55e-05	-1.13652	0.007	0.016	0.739129
RRAD	1.63e-07	-1.13642	0.017	0.034	0.00264408
ANKZF1	8.3e-13	-1.1364	0.025	0.054	1.35e-08
COG5	2.48e-18	-1.13578	0.04	0.083	4.02e-14
REV1	1.57e-06	-1.13538	0.012	0.025	0.0255182
ZNF529	4.76e-05	-1.13514	0.01	0.02	0.773179
PNPLA4	3.11e-05	-1.13473	0.007	0.016	0.505486
LCMT2	5.58e-05	-1.13473	0.007	0.016	0.906906
ARHGAP21	0.000417443	-1.13473	0.007	0.015	1
YWHAB	1.6e-06	-1.13464	0.015	0.029	0.0259165
TJAP1	0.00122314	-1.13389	0.005	0.011	1
TMEM86B	6.54e-05	-1.13375	0.01	0.02	1
ENDOD1	5.58e-05	-1.13285	0.007	0.016	0.907071
SLC27A1	0.000174073	-1.13285	0.007	0.015	1
USP42	4.08e-07	-1.13179	0.014	0.029	0.00663494
EFHD1	2.55e-13	-1.13148	0.035	0.069	4.14e-09
HDHD2	0.000121448	-1.1309	0.007	0.015	1
TSC1	7.62e-15	-1.13074	0.031	0.065	1.24e-10
COL12A1	1.11e-124	-1.13041	0.249	0.484	1.81e-120
LRP4	1.69e-12	-1.13028	0.029	0.059	2.75e-08
ZNF266	6.42e-10	-1.13016	0.022	0.045	1.04e-05
KIAA0319L	1.61e-07	-1.12992	0.016	0.033	0.00262177
GGA1	2.48e-13	-1.12988	0.031	0.063	4.02e-09
MEN1	0.000118994	-1.12933	0.009	0.019	1
EFCAB1	1.09e-08	-1.12925	0.018	0.037	0.000177508
MIER3	1.42e-10	-1.12923	0.026	0.052	2.31e-06
MKS1	1.09e-06	-1.12836	0.011	0.024	0.0176463
USE1	3.08e-06	-1.12836	0.011	0.024	0.0500655
RAD51C	4.23e-09	-1.1283	0.022	0.044	6.87e-05
ASTN2	0.000850052	-1.12792	0.004	0.01	1
NAA80	0.00328307	-1.12792	0.005	0.01	1
CYP7B1	1.29e-05	-1.12776	0.009	0.019	0.210002
ALDH5A1	1.74e-06	-1.1277	0.014	0.028	0.0283133
SPG7	1.1e-17	-1.12654	0.045	0.089	1.79e-13
SPARCL1	2.48e-244	-1.12556	0.588	0.843	4.02e-240
MMP16	3.69e-11	-1.12537	0.026	0.053	6e-07
RAB3D	0.000126714	-1.1245	0.006	0.014	1
HHIPL1	3.22e-05	-1.12445	0.009	0.019	0.523442
TADA2B	7.69e-06	-1.12439	0.013	0.025	0.125015
PPIL3	5.04e-07	-1.12323	0.013	0.027	0.00819353
CAPS	4.63e-06	-1.12323	0.013	0.026	0.0752992
MORN2	1.81e-10	-1.12259	0.024	0.048	2.94e-06
SLC66A3	0.000224665	-1.12217	0.006	0.014	1
SLC35A1	7.05e-15	-1.12133	0.038	0.075	1.14e-10
HSPA13	4.64e-06	-1.12084	0.013	0.026	0.0754483
OLFM2	5.21e-07	-1.12029	0.014	0.03	0.00847245
CSTF2T	1.37e-16	-1.11978	0.038	0.078	2.23e-12
UPF3B	8.41e-06	-1.1196	0.012	0.025	0.136599
SOBP	1.33e-14	-1.11922	0.032	0.066	2.17e-10
LYN	4.84e-05	-1.11903	0.008	0.018	0.785758
SRGAP3	0.000172542	-1.11903	0.008	0.017	1
PCDHGA7	0.000172542	-1.11903	0.008	0.017	1
PAXIP1	0.000172542	-1.11903	0.008	0.017	1
ADGRA3	4.85e-09	-1.11871	0.018	0.038	7.88e-05
NDUFA10	1.96e-27	-1.11865	0.066	0.133	3.19e-23
ZNF540	6.67e-05	-1.11861	0.01	0.021	1
ZNF740	4.8e-13	-1.11807	0.028	0.058	7.8e-09
IFFO1	8.25e-09	-1.11786	0.018	0.038	0.000134079
ACVR2B	0.000338709	-1.11716	0.006	0.013	1
H2AFX	0.000338709	-1.11716	0.006	0.013	1
DNPH1	1.29e-09	-1.11698	0.018	0.038	2.1e-05
ARRDC3	1.87e-20	-1.11661	0.046	0.095	3.03e-16
RNFT1	5.38e-05	-1.11545	0.01	0.02	0.873389
KIF3C	0.000726326	-1.11446	0.006	0.013	1
KIAA1328	0.00259153	-1.11446	0.006	0.012	1
SIMC1	6.95e-10	-1.11401	0.02	0.043	1.13e-05
OPHN1	4.79e-09	-1.11401	0.022	0.043	7.78e-05
ADAMTSL4	2.97e-07	-1.11351	0.014	0.029	0.00482224
CFH	6.81e-13	-1.11349	0.035	0.067	1.11e-08
ZNF141	3.18e-10	-1.11324	0.02	0.042	5.16e-06
AGL	1.65e-12	-1.11317	0.024	0.051	2.68e-08
NUP160	1.05e-12	-1.11305	0.035	0.067	1.71e-08
STRADA	0.000152451	-1.11299	0.008	0.017	1
PIK3C3	0.000432295	-1.11299	0.008	0.016	1
TTF1	1.67e-07	-1.1124	0.018	0.035	0.00270702
KCTD13	1.38e-05	-1.11229	0.014	0.027	0.224598
PAPLN	1.21e-21	-1.11224	0.053	0.106	1.96e-17
EMID1	6.75e-06	-1.11209	0.009	0.021	0.109635
SCO1	0.00153281	-1.11163	0.006	0.012	1
TMEM63B	4.7e-11	-1.11141	0.021	0.045	7.63e-07
EXOSC3	1.06e-09	-1.11024	0.018	0.039	1.73e-05
AFF3	2.24e-05	-1.10977	0.013	0.025	0.363499
GET1	2.45e-25	-1.10944	0.056	0.117	3.97e-21
HOXA9	1.38e-11	-1.10893	0.03	0.059	2.25e-07
SHROOM1	0.000627887	-1.10864	0.006	0.012	1
ZNF382	0.00109523	-1.10864	0.006	0.012	1
PLD1	9.44e-05	-1.10856	0.008	0.016	1
PHF5A	4.79e-05	-1.10852	0.01	0.02	0.77867
HELZ	1.01e-05	-1.10849	0.011	0.023	0.163554
CA5B	7.78e-11	-1.10843	0.018	0.041	1.26e-06
SLC10A7	1.97e-10	-1.1084	0.023	0.048	3.19e-06
SLC1A5	3.21e-08	-1.1074	0.017	0.034	0.000522075
WDR19	3.74e-18	-1.1071	0.038	0.08	6.07e-14
CCT4	2.97e-10	-1.10706	0.025	0.05	4.83e-06
PRELID2	1.38e-11	-1.10685	0.02	0.045	2.25e-07
FARP2	2.04e-14	-1.10602	0.036	0.071	3.31e-10
IFIT1	0.00134531	-1.10549	0.006	0.012	1
COL21A1	6.11e-10	-1.10474	0.023	0.046	9.93e-06
RARRES2	1.38e-09	-1.10362	0.017	0.038	2.24e-05
C1QB	4.26e-08	-1.1036	0.019	0.037	0.000691999
TMX1	1.25e-08	-1.10315	0.019	0.038	0.000203585
SLC5A3	2.89e-25	-1.10301	0.06	0.122	4.7e-21
PLEKHA8	2.05e-05	-1.10294	0.013	0.025	0.33351
RAB40B	5.18e-05	-1.10271	0.009	0.019	0.842164
MTX1	0.000948558	-1.10216	0.005	0.012	1
ARHGAP10	5.88e-08	-1.10193	0.016	0.033	0.000955201
PYGO2	9.94e-05	-1.10122	0.007	0.015	1
BDH2	3.67e-17	-1.10111	0.038	0.078	5.96e-13
ADCK2	2.28e-07	-1.10108	0.013	0.028	0.00370216
RAD51B	1.27e-13	-1.10024	0.028	0.059	2.06e-09
TET1	1.16e-09	-1.10016	0.02	0.042	1.88e-05
GLT8D2	2.66e-09	-1.10016	0.021	0.042	4.32e-05
AMPD2	3.11e-07	-1.09997	0.012	0.027	0.00505777
NRBF2	2.11e-07	-1.09976	0.014	0.029	0.00342777
UBAP2	1.33e-10	-1.0992	0.021	0.044	2.16e-06
EPB41	0.0020311	-1.09864	0.005	0.011	1
B4GALT4	1.71e-05	-1.09844	0.012	0.024	0.277834
OMD	0.000234218	-1.09844	0.012	0.022	1
UMAD1	1.19e-08	-1.09838	0.018	0.038	0.000192563
GAPVD1	7.03e-12	-1.09688	0.025	0.052	1.14e-07
SUN1	1.57e-29	-1.09665	0.072	0.145	2.54e-25
VIPAS39	2.64e-05	-1.09662	0.01	0.021	0.428162
HMCES	6.04e-05	-1.09662	0.01	0.02	0.980586
DOHH	0.000109777	-1.09662	0.01	0.02	1
F2R	0.000452381	-1.09662	0.01	0.019	1
LRIG3	2.75e-16	-1.09655	0.04	0.08	4.47e-12
VGLL4	5.69e-16	-1.0964	0.037	0.076	9.25e-12
ZC3HAV1L	1.43e-06	-1.09563	0.014	0.028	0.023204
ALG9	4.95e-09	-1.09402	0.021	0.042	8.04e-05
TPST1	9.77e-24	-1.09372	0.063	0.124	1.59e-19
ACOX3	9.55e-10	-1.09312	0.021	0.043	1.55e-05
AMD1	1.17e-07	-1.09312	0.022	0.041	0.00190404
TFDP2	5.26e-06	-1.09272	0.013	0.026	0.0854407
MPP6	1.05e-05	-1.09272	0.013	0.025	0.170346
FBXO33	1.26e-05	-1.09272	0.014	0.026	0.204454
TMSB15B	4.72e-08	-1.09267	0.02	0.039	0.00076696
SEPSECS	1.58e-10	-1.09179	0.022	0.046	2.56e-06
ZBTB9	0.000102178	-1.0916	0.008	0.017	1
LINS1	4.28e-08	-1.09148	0.016	0.033	0.000696122
ASXL2	3.7e-07	-1.09148	0.016	0.032	0.00601797
BCS1L	2.55e-06	-1.09013	0.011	0.024	0.0415007
ARMCX4	2.31e-08	-1.08991	0.018	0.036	0.00037588
ZNF786	0.000679636	-1.08982	0.006	0.013	1
ZNF10	0.00261341	-1.08982	0.007	0.013	1
TM9SF2	2.83e-06	-1.08967	0.013	0.026	0.0459126
HERC4	6.99e-10	-1.08937	0.02	0.043	1.14e-05
CCT8	2.18e-14	-1.08916	0.035	0.071	3.54e-10
EAPP	6.92e-17	-1.08869	0.05	0.094	1.12e-12
ZNF704	3.64e-40	-1.08869	0.099	0.196	5.92e-36
METTL17	2.67e-06	-1.08867	0.009	0.021	0.0433497
SRSF10	5.42e-05	-1.08867	0.01	0.02	0.879781
TPBG	1.49e-06	-1.08809	0.013	0.026	0.0242181
NOC4L	9.46e-06	-1.08809	0.013	0.025	0.153685
TRAP1	4.26e-20	-1.08792	0.05	0.1	6.92e-16
TAS2R4	4.82e-05	-1.08653	0.01	0.02	0.782593
DCAF17	2.89e-09	-1.08639	0.025	0.048	4.7e-05
GATA2	1.33e-14	-1.0853	0.036	0.072	2.16e-10
CLDN12	1.01e-10	-1.08511	0.031	0.059	1.65e-06
KIF22	2.19e-06	-1.08498	0.014	0.028	0.03556
ARID5B	2.74e-47	-1.08477	0.128	0.243	4.45e-43
ZNF524	1.84e-05	-1.0846	0.011	0.022	0.299205
XKR8	5.89e-05	-1.08431	0.009	0.019	0.956334
C6orf163	1.06e-08	-1.08377	0.014	0.032	0.000171735
ABCA5	4.39e-10	-1.08354	0.021	0.044	7.14e-06
LINC00672	0.000484028	-1.08329	0.006	0.013	1
IFNAR1	0.000833745	-1.08329	0.006	0.013	1
ZNF324	0.000102515	-1.08312	0.013	0.023	1
ASB3	3.14e-15	-1.08274	0.038	0.076	5.1e-11
ABCF2	2.9e-08	-1.08226	0.02	0.039	0.000470547
TMEM241	0.00267382	-1.08226	0.005	0.01	1
ASB8	1.67e-13	-1.08203	0.037	0.071	2.72e-09
METTL6	0.000432558	-1.08202	0.009	0.018	1
ADK	1.95e-12	-1.08163	0.029	0.059	3.16e-08
RAI1	1.32e-12	-1.08143	0.033	0.064	2.14e-08
SERPINB9	0.000343577	-1.08114	0.007	0.015	1
DERL2	4.09e-13	-1.08068	0.035	0.068	6.64e-09
CCDC32	1.08e-12	-1.08021	0.028	0.058	1.75e-08
PDK3	0.000289447	-1.07978	0.006	0.013	1
ZNF101	0.00059405	-1.07978	0.006	0.013	1
C3orf33	0.00102247	-1.07978	0.006	0.013	1
TAF12	6.37e-05	-1.07966	0.009	0.019	1
MRVI1	7.54e-66	-1.07959	0.162	0.312	1.22e-61
GCLC	5.31e-17	-1.07853	0.053	0.099	8.63e-13
ZNF823	1.63e-06	-1.07811	0.015	0.029	0.0264435
WIF1	0.00229288	-1.07747	0.004	0.01	1
AMACR	2.86e-06	-1.07714	0.013	0.026	0.046524
MCM5	6.39e-08	-1.07709	0.018	0.035	0.00103861
CEP95	7.68e-12	-1.07704	0.03	0.059	1.25e-07
USP20	2.46e-05	-1.07647	0.01	0.021	0.400203
CCDC117	1.33e-07	-1.07636	0.021	0.039	0.0021639
RAB3IP	1e-06	-1.07619	0.016	0.032	0.0163236
GATB	0.000729199	-1.07609	0.006	0.013	1
SPRYD7	0.00212379	-1.07609	0.006	0.012	1
TUBD1	2.24e-10	-1.07581	0.023	0.047	3.63e-06
ARHGEF3	3.57e-16	-1.0748	0.043	0.085	5.81e-12
ARHGEF19	3.65e-05	-1.07429	0.01	0.021	0.592688
ELK1	4.11e-09	-1.07402	0.02	0.041	6.67e-05
CPEB3	3.78e-05	-1.07398	0.012	0.023	0.613401
SNUPN	1.56e-09	-1.07365	0.025	0.049	2.53e-05
MBD6	4.88e-15	-1.07296	0.038	0.076	7.93e-11
NMB	0.000895252	-1.07221	0.006	0.012	1
SEMA6A	8.38e-05	-1.07207	0.008	0.018	1
SPEN	8.98e-11	-1.07191	0.022	0.047	1.46e-06
LDLRAD4	6.45e-18	-1.07136	0.043	0.087	1.05e-13
TNFAIP8	4.25e-06	-1.07048	0.015	0.03	0.0689996
TCEAL2	4.43e-12	-1.07047	0.03	0.06	7.2e-08
ABCC5	3.06e-09	-1.06975	0.021	0.042	4.97e-05
SMAD9	1.32e-08	-1.06975	0.02	0.04	0.000214511
ZFAND2B	6.42e-11	-1.06945	0.026	0.053	1.04e-06
PDS5B	1.16e-21	-1.06941	0.053	0.106	1.88e-17
EEF1AKNMT	0.00285354	-1.06936	0.009	0.015	1
CDK13	3.21e-16	-1.06923	0.042	0.082	5.21e-12
ANKRD12	1.34e-15	-1.06905	0.038	0.076	2.18e-11
PCNX4	1.99e-07	-1.06899	0.015	0.031	0.00322521
PARP1	0.000246802	-1.06887	0.007	0.015	1
ZBTB3	0.000246802	-1.06887	0.007	0.015	1
PRPS1	7.09e-07	-1.0687	0.014	0.029	0.0115265
GLIPR1	7.72e-17	-1.06848	0.045	0.088	1.25e-12
HACE1	3.55e-09	-1.06825	0.024	0.047	5.76e-05
TPK1	0.00188727	-1.06811	0.006	0.012	1
SMO	1.95e-14	-1.06803	0.039	0.076	3.17e-10
LUC7L3	6.9e-57	-1.06767	0.156	0.292	1.12e-52
PRIMPOL	3.65e-06	-1.06746	0.015	0.029	0.0592707
KCNJ8	4.46e-05	-1.06733	0.01	0.02	0.724768
IFT27	0.000142492	-1.06656	0.008	0.017	1
GABRE	5.09e-09	-1.06598	0.018	0.038	8.26e-05
PAXBP1	2.94e-06	-1.0659	0.015	0.029	0.0477472
KLHL13	0.000150329	-1.06546	0.007	0.015	1
CREB3L4	0.000868263	-1.06546	0.007	0.014	1
ZCWPW2	5.45e-05	-1.06486	0.01	0.02	0.884878
RNF24	1.03e-08	-1.06474	0.018	0.038	0.000168122
WLS	7.64e-25	-1.0647	0.058	0.118	1.24e-20
C17orf80	4.96e-05	-1.06453	0.013	0.024	0.806455
ZNF718	0.00165788	-1.06379	0.005	0.011	1
SLC1A3	0.00203637	-1.06379	0.005	0.011	1
DNASE1	0.000651242	-1.06364	0.008	0.016	1
CDV3	1.52e-05	-1.06357	0.011	0.023	0.246965
AKAP9	9.62e-37	-1.06337	0.089	0.179	1.56e-32
NAT9	9.74e-15	-1.06306	0.032	0.067	1.58e-10
ALMS1	7.67e-13	-1.06273	0.033	0.065	1.25e-08
MYO9A	6.89e-18	-1.06263	0.045	0.089	1.12e-13
ZNF697	1.41e-05	-1.06255	0.012	0.024	0.229757
TCEAL9	1.75e-12	-1.06254	0.025	0.053	2.84e-08
BLOC1S6	2.79e-07	-1.06199	0.016	0.032	0.00453912
ENTPD5	0.000370676	-1.0619	0.007	0.014	1
IL17RA	0.000370676	-1.0619	0.007	0.014	1
C1orf21	3.91e-40	-1.06152	0.122	0.225	6.35e-36
P4HTM	1.64e-13	-1.06136	0.04	0.076	2.67e-09
NRF1	1.35e-06	-1.06104	0.015	0.03	0.0219449
MAPKBP1	6.22e-14	-1.06016	0.035	0.069	1.01e-09
CETN2	1.2e-06	-1.05998	0.017	0.032	0.0195185
MED7	9.9e-05	-1.05969	0.009	0.019	1
DYNC2H1	8.02e-20	-1.05905	0.048	0.097	1.3e-15
CCDC36	6.16e-05	-1.05899	0.011	0.021	1
CNNM4	0.000764749	-1.05899	0.011	0.019	1
NEK4	3.06e-07	-1.05891	0.016	0.032	0.00497152
UCP2	0.00320892	-1.05818	0.006	0.012	1
NCAPD3	5.94e-08	-1.05793	0.019	0.038	0.000965201
NAP1L3	1.12e-05	-1.05763	0.015	0.028	0.182222
SCAF4	3.31e-07	-1.05732	0.015	0.031	0.00538489
BRAP	5.06e-07	-1.05732	0.016	0.031	0.00822273
MSH5	1.72e-07	-1.05706	0.017	0.034	0.0028012
FXN	0.000195748	-1.0566	0.011	0.02	1
SEC31B	5.82e-08	-1.05545	0.017	0.035	0.000946259
LDAH	7.99e-08	-1.05534	0.019	0.037	0.00129739
GPR27	0.00203802	-1.05439	0.005	0.011	1
ING2	0.00158805	-1.05429	0.007	0.013	1
CSGALNACT1	9.19e-06	-1.05414	0.01	0.021	0.149353
NDUFA7	9.12e-05	-1.05414	0.011	0.021	1
DEDD2	9.12e-05	-1.05414	0.011	0.021	1
MYOM1	1.4e-05	-1.05411	0.012	0.023	0.227249
AMN1	1.42e-05	-1.05409	0.013	0.025	0.230187
MADD	3.51e-12	-1.05398	0.026	0.054	5.7e-08
GTF2H4	9.97e-11	-1.05395	0.036	0.066	1.62e-06
ABI2	1.98e-22	-1.05392	0.064	0.123	3.21e-18
LY6G5B	1.94e-10	-1.05293	0.024	0.048	3.15e-06
CGNL1	1.44e-15	-1.05264	0.054	0.098	2.33e-11
UBE2E1	8e-10	-1.05147	0.019	0.04	1.3e-05
DHX57	1.93e-09	-1.05131	0.018	0.038	3.13e-05
SCAMP1	1.43e-07	-1.05131	0.018	0.036	0.00232081
SIRT6	0.000397772	-1.05127	0.009	0.018	1
ZNF26	0.000838447	-1.04925	0.005	0.011	1
TNFRSF19	0.0017699	-1.04925	0.005	0.011	1
TUBG1	6.67e-05	-1.04899	0.01	0.02	1
GPD2	0.000349643	-1.04899	0.01	0.019	1
PRPF39	1.42e-25	-1.04818	0.073	0.139	2.3e-21
BMERB1	8.29e-18	-1.04777	0.043	0.087	1.35e-13
CCS	4.61e-14	-1.04741	0.042	0.079	7.49e-10
CSAD	3.16e-22	-1.04725	0.06	0.117	5.14e-18
HNRNPR	5.95e-07	-1.04708	0.018	0.035	0.00966711
DENR	4.77e-08	-1.04705	0.022	0.042	0.000774976
ALS2	1.33e-14	-1.04679	0.041	0.079	2.16e-10
SARNP	1.47e-07	-1.04647	0.012	0.027	0.00239414
CRYZL1	1.4e-05	-1.04647	0.014	0.027	0.227659
CEP72	0.000111233	-1.0463	0.01	0.019	1
SF3B1	9.66e-13	-1.04539	0.032	0.064	1.57e-08
IL17RC	1.13e-08	-1.04495	0.024	0.046	0.000184253
RNPC3	4.82e-16	-1.0446	0.051	0.094	7.82e-12
IMMP2L	0.00881051	-1.0438	0.005	0.01	1
MTF2	2.59e-07	-1.0434	0.017	0.034	0.00421604
SEC24B	9.22e-11	-1.04334	0.026	0.052	1.5e-06
ATP6V1C1	8.85e-14	-1.0433	0.044	0.082	1.44e-09
ERCC6L2	1.48e-18	-1.04328	0.058	0.108	2.4e-14
ZFP1	2.25e-06	-1.04254	0.016	0.03	0.0365297
KIF3A	7.24e-06	-1.04241	0.013	0.026	0.117677
SALL2	1.58e-05	-1.04241	0.013	0.026	0.256962
GARNL3	0.000143124	-1.04194	0.008	0.017	1
TMTC2	1.07e-09	-1.04185	0.027	0.051	1.74e-05
NDUFAF2	1.62e-08	-1.0411	0.017	0.035	0.000263972
NGEF	0.000270508	-1.04066	0.009	0.018	1
EXOSC9	1.85e-11	-1.03978	0.03	0.059	3e-07
ZNF207	0.000583056	-1.03978	0.007	0.015	1
GYPC	5.12e-14	-1.03968	0.041	0.078	8.31e-10
SLC22A17	2.31e-09	-1.0395	0.024	0.048	3.75e-05
FAN1	1.49e-08	-1.03904	0.018	0.038	0.000242318
PLEKHH3	3.79e-17	-1.03888	0.045	0.088	6.16e-13
ENTPD7	7.33e-05	-1.0386	0.008	0.017	1
TMEM240	8.65e-17	-1.038	0.048	0.093	1.4e-12
WDR54	0.00268103	-1.038	0.005	0.01	1
FAM78B	0.00378652	-1.038	0.005	0.01	1
NDN	1.72e-09	-1.03784	0.021	0.042	2.79e-05
MED26	0.000436146	-1.0377	0.009	0.018	1
PHF14	7.37e-12	-1.03767	0.036	0.067	1.2e-07
TMEM69	4.01e-06	-1.0376	0.014	0.028	0.0651903
TMEM42	2.95e-06	-1.03712	0.016	0.03	0.0478796
CYP2R1	1.59e-05	-1.03699	0.01	0.021	0.258222
GAN	5.6e-05	-1.03699	0.011	0.021	0.909116
RPA2	6.81e-05	-1.03699	0.01	0.021	1
SS18L1	0.00031472	-1.03699	0.011	0.02	1
BTBD19	0.00125884	-1.03667	0.006	0.012	1
RABL3	4.18e-05	-1.03643	0.012	0.023	0.678376
CLCN2	0.000140511	-1.03643	0.012	0.022	1
PIKFYVE	1.46e-15	-1.03633	0.054	0.098	2.37e-11
CD68	7.2e-14	-1.03633	0.046	0.085	1.17e-09
HCFC2	7.31e-08	-1.03603	0.019	0.037	0.0011873
GM2A	1.3e-06	-1.03603	0.018	0.034	0.0211151
GPR135	3.69e-05	-1.03596	0.013	0.025	0.598711
PIGL	1.37e-08	-1.03575	0.019	0.039	0.00022266
SLC35D1	1.35e-06	-1.03557	0.014	0.029	0.0219039
CADM4	2.05e-09	-1.03547	0.027	0.052	3.34e-05
FAM110B	5.85e-16	-1.03521	0.041	0.081	9.5e-12
C6orf136	0.000143342	-1.03513	0.008	0.017	1
PRIM1	3.3e-06	-1.0335	0.014	0.028	0.0535628
TRIM28	9.84e-10	-1.03349	0.027	0.051	1.6e-05
FBXO17	1.11e-10	-1.03331	0.028	0.054	1.8e-06
ARHGEF17	1.27e-25	-1.03288	0.079	0.147	2.06e-21
WDR73	8.94e-12	-1.03284	0.034	0.065	1.45e-07
USP28	1.49e-08	-1.03265	0.022	0.043	0.00024278
OSR2	1.63e-33	-1.03236	0.09	0.175	2.65e-29
DDX3X	3.64e-12	-1.03229	0.027	0.055	5.91e-08
CKS1B	6.28e-13	-1.03225	0.027	0.056	1.02e-08
TPP2	2.68e-14	-1.032	0.038	0.074	4.35e-10
PYROXD1	0.00261086	-1.03168	0.006	0.012	1
PXMP4	0.000175272	-1.03153	0.008	0.017	1
OCLN	4.5e-05	-1.03145	0.01	0.02	0.731118
ZDHHC6	0.000928757	-1.03145	0.011	0.019	1
GGCX	2.58e-06	-1.03134	0.017	0.032	0.0418378
USP46	1.51e-08	-1.03132	0.019	0.039	0.00024487
CCP110	9.03e-11	-1.03128	0.024	0.049	1.47e-06
NLRP1	3.04e-12	-1.03126	0.028	0.056	4.95e-08
PDGFRB	6.65e-56	-1.02976	0.176	0.315	1.08e-51
GFPT2	3.44e-05	-1.02903	0.012	0.023	0.559235
VANGL2	4.99e-05	-1.02903	0.013	0.024	0.810898
TSPOAP1	1.66e-16	-1.02885	0.046	0.089	2.7e-12
MEX3B	1.91e-08	-1.02855	0.02	0.04	0.00030971
ATAD1	6.81e-14	-1.02841	0.04	0.076	1.11e-09
CRISPLD1	0.00029681	-1.02822	0.009	0.018	1
USP30	3.17e-07	-1.02806	0.018	0.035	0.00514477
TRMT61B	4.71e-07	-1.02785	0.017	0.033	0.00765132
IRF2BP1	1.16e-13	-1.02776	0.032	0.065	1.88e-09
ASNSD1	2.91e-14	-1.02759	0.038	0.075	4.72e-10
ROBO1	1.29e-17	-1.02747	0.051	0.097	2.09e-13
KBTBD3	2.65e-05	-1.02733	0.014	0.027	0.431091
BRWD1	2.42e-18	-1.02717	0.054	0.103	3.93e-14
BRIX1	2.38e-06	-1.027	0.013	0.027	0.0386722
ZBTB14	1.9e-05	-1.027	0.013	0.025	0.309111
ZMYND19	5.34e-05	-1.027	0.014	0.025	0.867338
EPHB3	3.26e-40	-1.02655	0.101	0.199	5.29e-36
OSBPL7	0.00189405	-1.02641	0.006	0.012	1
RNF121	6.43e-08	-1.02638	0.017	0.034	0.00104452
GATC	7.5e-05	-1.02614	0.011	0.022	1
COQ2	0.000440878	-1.02614	0.011	0.02	1
RPRD2	1.41e-12	-1.02578	0.03	0.061	2.29e-08
C1orf52	6.03e-09	-1.02576	0.026	0.049	9.8e-05
CNOT3	2.26e-08	-1.02552	0.025	0.047	0.000366845
PARD3B	5.96e-16	-1.02513	0.049	0.092	9.69e-12
ETFDH	1.64e-07	-1.02507	0.018	0.035	0.00266581
NGLY1	7.5e-10	-1.02489	0.026	0.051	1.22e-05
DNAJA2	4.91e-22	-1.02477	0.064	0.122	7.98e-18
PEX1	1.56e-05	-1.02473	0.013	0.026	0.25374
VPS33A	4.01e-05	-1.02473	0.013	0.025	0.651361
RAB30	9.53e-05	-1.02391	0.008	0.016	1
TTI2	2.28e-05	-1.02371	0.016	0.029	0.369961
TSPYL2	1.79e-35	-1.02327	0.104	0.196	2.9e-31
ZNF808	0.00048732	-1.02265	0.006	0.013	1
ZNF624	0.000266861	-1.02249	0.01	0.019	1
FAM102A	4.75e-16	-1.02246	0.045	0.086	7.72e-12
ZNF687	6.34e-05	-1.02241	0.013	0.025	1
DHX35	1.31e-09	-1.02153	0.026	0.05	2.12e-05
CD248	2.44e-29	-1.02138	0.087	0.164	3.97e-25
EED	0.000363359	-1.02135	0.009	0.017	1
SWI5	0.000783562	-1.02135	0.009	0.017	1
GFER	0.00232379	-1.02085	0.006	0.011	1
KNDC1	0.00232379	-1.02085	0.006	0.011	1
SRSF7	5.37e-08	-1.02042	0.021	0.041	0.00087297
CEP162	3.2e-09	-1.02015	0.023	0.045	5.2e-05
RBM14	4.15e-15	-1.01999	0.051	0.093	6.74e-11
ADCY3	1.65e-20	-1.01936	0.06	0.114	2.68e-16
MED11	0.000393045	-1.01931	0.01	0.019	1
TRMT6	0.000393045	-1.01931	0.01	0.019	1
TOGARAM1	4.67e-12	-1.01928	0.033	0.064	7.58e-08
MTG2	2.14e-06	-1.01896	0.011	0.024	0.0348452
N6AMT1	2.47e-06	-1.01854	0.016	0.031	0.0401439
BMI1	5.84e-13	-1.01851	0.042	0.077	9.49e-09
ACD	2.88e-11	-1.01807	0.026	0.053	4.68e-07
GBA	1.56e-11	-1.0179	0.034	0.064	2.53e-07
CCNQ	0.000270617	-1.01773	0.009	0.017	1
LAMA2	3.73e-18	-1.01769	0.052	0.099	6.06e-14
ADAT2	6.72e-05	-1.01766	0.01	0.02	1
SPATS2L	0.000145479	-1.01761	0.013	0.024	1
CLEC16A	1.77e-12	-1.01704	0.038	0.071	2.87e-08
ZNF217	1.15e-11	-1.01695	0.03	0.059	1.87e-07
TRMT112	3.02e-13	-1.01666	0.039	0.074	4.91e-09
AMOTL1	1.61e-17	-1.01658	0.053	0.099	2.61e-13
MXI1	2.82e-18	-1.01648	0.064	0.116	4.58e-14
COX7A2L	1.62e-21	-1.01592	0.059	0.115	2.63e-17
RCOR1	3.6e-10	-1.01569	0.025	0.05	5.85e-06
SEC16A	4.41e-10	-1.01569	0.026	0.051	7.16e-06
LGALS3	5.43e-26	-1.01551	0.082	0.152	8.83e-22
ST5	2.49e-11	-1.01533	0.029	0.057	4.05e-07
SYNJ1	7.13e-05	-1.01512	0.013	0.024	1
OTUD6B	3.19e-09	-1.01499	0.024	0.046	5.19e-05
ZRANB3	0.00480126	-1.01496	0.005	0.011	1
NOB1	7.32e-08	-1.01489	0.017	0.035	0.00118939
MXRA5	1.5e-07	-1.01451	0.021	0.04	0.00242898
EPM2AIP1	1.03e-13	-1.01413	0.042	0.078	1.67e-09
SLC31A1	2.75e-05	-1.01412	0.014	0.026	0.446201
SMDT1	2.75e-19	-1.01401	0.058	0.11	4.46e-15
ZMIZ1	1.53e-31	-1.01369	0.099	0.182	2.48e-27
L3MBTL1	8.19e-08	-1.01355	0.019	0.037	0.00133132
KCNQ4	1.27e-05	-1.01352	0.011	0.023	0.205737
ATP9B	9.46e-06	-1.01326	0.015	0.028	0.153616
GDI2	1.81e-05	-1.01326	0.015	0.028	0.294801
ALDH7A1	3.52e-07	-1.01298	0.021	0.039	0.00572623
SNX5	1.43e-07	-1.01289	0.023	0.043	0.00232462
PCDH18	6.27e-31	-1.01265	0.092	0.173	1.02e-26
METTL9	3.63e-15	-1.01216	0.047	0.088	5.9e-11
NUP43	9.35e-13	-1.01214	0.042	0.077	1.52e-08
ELP4	5.47e-07	-1.01192	0.019	0.036	0.00888585
SPIDR	7.15e-07	-1.01185	0.017	0.032	0.0116163
TRANK1	1.24e-13	-1.01159	0.038	0.074	2.02e-09
AGPAT4	1.16e-11	-1.01153	0.036	0.067	1.89e-07
HS2ST1	1.01e-10	-1.01114	0.024	0.049	1.64e-06
BMP2K	9e-09	-1.01114	0.024	0.046	0.000146293
FKBP10	1.07e-13	-1.01111	0.04	0.076	1.73e-09
LSM5	8.76e-06	-1.01104	0.015	0.028	0.142397
CIRBP	7.26e-158	-1.01037	0.426	0.688	1.18e-153
LIG1	7.06e-09	-1.01017	0.023	0.045	0.000114742
FUNDC2	0.000539679	-1.01008	0.009	0.017	1
LATS1	7.87e-16	-1.01007	0.05	0.093	1.28e-11
C1orf35	2.06e-06	-1.00988	0.016	0.031	0.0335355
ANKRD13C	1.31e-09	-1.00952	0.029	0.054	2.13e-05
AFAP1L2	6.95e-18	-1.00931	0.052	0.1	1.13e-13
EFEMP2	3.33e-23	-1.00915	0.065	0.126	5.42e-19
SERTM2	0.000181438	-1.00915	0.009	0.018	1
RMI1	0.00349961	-1.00873	0.005	0.011	1
TP53BP1	4.99e-14	-1.00871	0.046	0.084	8.11e-10
VPS8	0.000381675	-1.0084	0.011	0.02	1
ZMYM6	2.06e-06	-1.0083	0.015	0.03	0.033393
ANKRD50	1.08e-19	-1.00823	0.061	0.114	1.76e-15
MIGA2	5.04e-10	-1.00821	0.025	0.049	8.18e-06
LSM12	0.000192128	-1.00779	0.011	0.021	1
THAP7	4.95e-09	-1.00764	0.022	0.044	8.03e-05
FAM8A1	1.69e-08	-1.00738	0.023	0.044	0.000273861
SMIM13	6.45e-06	-1.00727	0.012	0.025	0.104781
IDUA	1.13e-13	-1.00671	0.044	0.082	1.84e-09
NPRL3	3.03e-06	-1.00613	0.015	0.029	0.0492815
GATM	0.000799803	-1.00604	0.008	0.016	1
ADAMTSL3	3.94e-09	-1.00595	0.022	0.044	6.4e-05
DDR1	3.96e-10	-1.00587	0.031	0.057	6.43e-06
ANKRD13D	3.79e-17	-1.0057	0.044	0.087	6.16e-13
NFAT5	7.13e-16	-1.00561	0.047	0.09	1.16e-11
ETFBKMT	0.000271289	-1.00554	0.009	0.018	1
SLC23A2	2.47e-15	-1.00553	0.049	0.091	4.01e-11
ZNF618	2.42e-13	-1.00542	0.042	0.078	3.93e-09
PPP1CC	2.26e-08	-1.00537	0.035	0.059	0.000367765
SLC20A2	2.27e-06	-1.00535	0.018	0.034	0.0369501
DCAF12	1.71e-09	-1.00516	0.028	0.052	2.77e-05
PRRG1	0.000150641	-1.00513	0.01	0.019	1
GALNT4	0.000201602	-1.00513	0.01	0.019	1
SMYD3	1.19e-05	-1.00452	0.013	0.025	0.192896
NAA25	1.92e-05	-1.00429	0.013	0.025	0.312105
NCAM1	3.65e-29	-1.00427	0.107	0.189	5.93e-25
ZNF680	1.62e-09	-1.00427	0.025	0.048	2.64e-05
RTKN	4.2e-07	-1.00375	0.015	0.031	0.00683026
CA11	2.37e-15	-1.00361	0.046	0.087	3.85e-11
NFKB1	1.19e-11	-1.00346	0.032	0.062	1.93e-07
BBS5	4.14e-08	-1.0032	0.02	0.04	0.000672598
RSPRY1	2.4e-14	-1.00277	0.05	0.091	3.9e-10
ELMOD2	8.16e-11	-1.00267	0.028	0.055	1.33e-06
RBM12	0.00429581	-1.0021	0.005	0.01	1
KPNA3	0.00145185	-1.00191	0.007	0.014	1
HAAO	6.18e-05	-1.00176	0.01	0.02	1
KANSL1	3.73e-05	-1.00168	0.013	0.025	0.606255
UAP1L1	5.99e-06	-1.00165	0.015	0.029	0.0973147
BTBD6	4.35e-09	-1.00156	0.024	0.046	7.06e-05
COX11	1.74e-10	-1.00154	0.027	0.053	2.83e-06
AKR1C3	0.00163981	1.02557	0.017	0.009	1
PTGER3	4.44e-41	1.02569	0.293	0.167	7.22e-37
PTPRB	0.000143088	1.03597	0.023	0.011	1
SDAD1	0.00280212	1.05501	0.015	0.008	1
DIPK2B	1.01e-05	1.06904	0.029	0.014	0.163695
SCARF1	0.000198023	1.07704	0.023	0.011	1
RNF125	0.0110723	1.09093	0.011	0.006	1
FAM189A2	0.000557133	1.09369	0.018	0.009	1
MAOA	0.00944656	1.10883	0.011	0.006	1
GIMAP4	8.87e-06	1.13275	0.03	0.015	0.144127
HSPA2	1.64e-05	1.13275	0.03	0.015	0.266976
ADAMTS6	0.00146128	1.14437	0.016	0.008	1
CD36	2.27e-05	1.16023	0.025	0.012	0.368105
OXTR	3.12e-06	1.161	0.028	0.012	0.0506366
COL4A4	0.00358437	1.16997	0.01	0.004	1
GNA14	2.37e-06	1.18672	0.033	0.016	0.0385424
PLAAT3	0.00878287	1.18931	0.01	0.005	1
ABCA10	3.91e-05	1.19347	0.02	0.009	0.635842
RAMP3	0.00164509	1.19847	0.015	0.007	1
MMRN2	0.000269427	1.20446	0.018	0.008	1
PAGE4	1.28e-05	1.2237	0.029	0.014	0.207282
PRKCH	0.000924081	1.24997	0.015	0.007	1
TPST2	0.00231974	1.33103	0.01	0.004	1
RASL11A	0.00175891	1.33335	0.011	0.004	1
AHR	0.000765817	1.33857	0.013	0.006	1
CCBE1	6.18e-05	1.34474	0.018	0.008	1
PI15	2.03e-12	1.35008	0.066	0.03	3.29e-08
TIE1	0.000748186	1.37105	0.01	0.003	1
DYSF	1.23e-05	1.37491	0.022	0.009	0.1993
EMCN	8.01e-11	1.4047	0.043	0.017	1.3e-06
CHST7	0.000453962	1.43592	0.013	0.005	1
ZNF366	0.000196175	1.45202	0.013	0.004	1
FAM9B	0.000167548	1.48282	0.014	0.005	1
CLSTN2	1.51e-12	1.48697	0.052	0.021	2.45e-08
FAM131B	0.000127584	1.54987	0.015	0.006	1
ARHGEF15	2.22e-07	1.63094	0.023	0.008	0.00361016
APCDD1	1.55e-24	1.66627	0.102	0.04	2.52e-20
NRN1	6.9e-05	1.67271	0.013	0.004	1
ADH1B	8.33e-10	1.67595	0.03	0.009	1.35e-05
GIMAP8	3.41e-06	1.69387	0.016	0.004	0.0554705
PLCB4	1.62e-05	1.70138	0.015	0.004	0.263792
CADPS2	2.02e-34	1.71392	0.271	0.174	3.28e-30
CLDN10	6.44e-06	1.74563	0.017	0.006	0.104566
NOVA2	3.93e-05	1.76477	0.012	0.003	0.638609
CD24	3.52e-08	1.77094	0.025	0.008	0.000572393
SGCA	2.62e-14	1.7815	0.046	0.014	4.26e-10
SEMA3G	4.44e-05	1.81007	0.013	0.004	0.721839
NOSTRIN	1.87e-06	1.81507	0.016	0.004	0.0303043
FLI1	3.23e-05	1.9671	0.012	0.003	0.525112
C1orf115	9.52e-06	1.99603	0.013	0.003	0.15472
GIMAP5	1.45e-06	2.01128	0.014	0.003	0.0235266
DNAJC15	4.82e-09	2.04772	0.025	0.007	7.83e-05
NDRG4	8.88e-08	2.14258	0.019	0.004	0.00144309
MMP28	5.85e-09	2.15322	0.019	0.004	9.5e-05
FABP4	6.34e-09	2.19701	0.026	0.008	0.000102944
CASP10	3.37e-06	2.23562	0.014	0.003	0.0547269
GIMAP6	1.85e-09	2.24428	0.023	0.005	3e-05
ABCB1	1.68e-05	2.29	0.011	0.002	0.273366
RGS11	3.12e-06	2.40944	0.012	0.002	0.0507129
GIMAP7	1.79e-08	2.47443	0.017	0.003	0.000290899
MMRN1	4.47e-06	2.52669	0.011	0.002	0.0725501
INMT	1.11e-06	2.87029	0.012	0.002	0.0180458
CLDN11	3.13e-08	2.95005	0.015	0.002	0.000508717
DAPP1	3.21e-16	3.37888	0.029	0.003	5.22e-12
MSLN	2.94e-17	3.62925	0.03	0.003	4.77e-13
CCL14	1.42e-25	4.16056	0.043	0.003	2.31e-21
HMCN2	7.48e-17	4.48943	0.027	0.001	1.21e-12
SLC6A1	6.15e-08	8.1877	0.01	0	0.000998874
CYP4B1	4.19e-09	8.5092	0.012	0	6.81e-05
NR5A2	8.76e-10	8.59157	0.013	0	1.42e-05
TRIM63	2.29e-10	8.78602	0.014	0	3.73e-06
WFDC2	4.71e-14	9.52522	0.019	0	7.65e-10
GRP	5.22e-40	11.7935	0.058	0	8.48e-36
